# Supplementary material
Source: PubMed Central journal article supplement (PMC3758252)
Supplement: NIHMS429604-supplement-01.pdf [file NIHMS429604-supplement-01.pdf]

# Child Abuse and Epigenetic Mechanisms of Disease Risk

Bao-Zhu Yang, PhD, Huiping Zhang, PhD, Wenjing Ge, MA, Natalie Weder, MD,  
Heather Douglas-Palumberi, MA, Francheska Perepletchikova, PhD,  
Joel Gelernter, MD, Joan Kaufman, PhD

---

## Appendix A

### Variability in methylation beta values

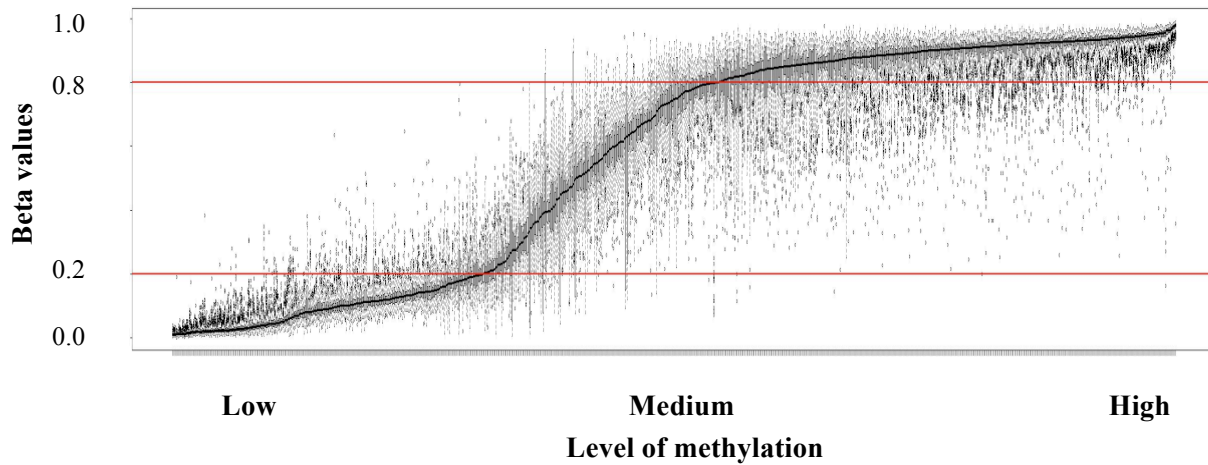

Figure 1A. The graph shows the mean (dark line) and distribution (scatter) of methylation beta values of 192 children for 1000 randomly selected CpG sites. Each site is summarized by a box-plot. These 1000 box-plots, sorted by means, empirically illustrate beta-distributed DNA methylation values (range: 0–1). Beta values in the mid-range have much larger variance than the variance of beta values for CpG sites with a mean at the two ends of the spectrum (0 and 1). The horizontal red lines denote the grouping beta-value thresholds of 0.2 and 0.8.

## Appendix B

### Results of model with age, gender, and race entered as covariates: noteworthy CpG sites

| IlluminaID | Maltreated | Control  | p-value  | Chromosome | CpG site location   |
|------------|------------|----------|----------|------------|---------------------|
| cg00021237 | 0.174678   | 0.124603 | 3.00E-08 | 8          | Promoter-associated |
| cg00024722 | 0.150617   | 0.169461 | 4.03E-07 | 15         | Promoter-associated |
| cg00026230 | 0.050587   | 0.039703 | 5.00E-09 | 16         | Body                |
| cg00026974 | 0.104915   | 0.075727 | 2.00E-09 | 17         | Body                |
| cg00040423 | 0.166992   | 0.190801 | 2.70E-07 | 6          | Body                |
| cg00077299 | 0.622283   | 0.577477 | 4.90E-08 | 22         | Promoter-associated |
| cg00097536 | 0.146437   | 0.166777 | 4.78E-07 | 2          | Promoter-associated |
| cg00102920 | 0.089325   | 0.102321 | 2.40E-08 | 6          | Promoter-associated |
| cg00123055 | 0.081209   | 0.066284 | 8.20E-08 | 8          | Body                |
| cg00147578 | 0.360139   | 0.302394 | 3.84E-07 | 12         | Intergenic          |
| cg00161515 | 0.811008   | 0.837007 | 3.60E-08 | 2          | 3'UTR               |
| cg00167275 | 0.167402   | 0.125518 | 5.00E-08 | 10         | Body                |
| cg00179576 | 0.859228   | 0.887179 | 0.00E+00 | 16         | 3'UTR               |
| cg00205436 | 0.765712   | 0.790064 | 1.35E-07 | 2          | Body                |
| cg00226085 | 0.778532   | 0.819693 | 5.30E-08 | 6          | Intergenic          |
| cg00226754 | 0.034183   | 0.025676 | 6.90E-08 | 12         | Promoter-associated |
| cg00231920 | 0.14572    | 0.165701 | 2.80E-08 | 20         | 5'UTR               |
| cg00252696 | 0.213562   | 0.146722 | 1.80E-08 | 1          | Body                |
| cg00260647 | 0.224573   | 0.18067  | 2.79E-07 | 6          | 5'UTR               |
| cg00271154 | 0.154471   | 0.185232 | 2.60E-08 | 2          | Promoter-associated |
| cg00280548 | 0.088404   | 0.068802 | 2.42E-07 | 10         | Body                |
| cg00280814 | 0.751098   | 0.782433 | 4.00E-09 | 22         | Body                |
| cg00292435 | 0.11586    | 0.134696 | 2.00E-09 | 9          | Promoter-associated |
| cg00306421 | 0.190626   | 0.230906 | 1.42E-07 | 18         | Promoter-associated |
| cg00319567 | 0.107967   | 0.087342 | 2.84E-07 | 13         | Body                |
| cg00320345 | 0.465872   | 0.448153 | 4.05E-07 | 10         | Intergenic          |
| cg00333870 | 0.838855   | 0.862288 | 5.40E-08 | 7          | Intergenic          |
| cg00350607 | 0.803619   | 0.837709 | 0.00E+00 | 6          | 3'UTR               |
| cg00355633 | 0.285367   | 0.343708 | 5.70E-08 | 1          | Body                |
| cg00371453 | 0.053181   | 0.042467 | 3.97E-07 | 19         | Body                |
| cg00389341 | 0.36315    | 0.31472  | 5.60E-08 | 6          | 5'UTR               |
| cg00393376 | 0.484243   | 0.551317 | 6.50E-08 | 7          | Promoter-associated |
| cg00395140 | 0.777767   | 0.811616 | 4.80E-07 | 19         | Body                |
| cg00399650 | 0.118196   | 0.136864 | 1.03E-07 | 7          | Promoter-associated |
| cg00402069 | 0.10337    | 0.074308 | 4.00E-09 | 5          | Body                |
| cg00419759 | 0.145063   | 0.16682  | 1.05E-07 | 1          | Promoter-associated |
| cg00420847 | 0.742834   | 0.776994 | 1.00E-09 | 19         | 5'UTR               |
| cg00422995 | 0.706521   | 0.751499 | 3.91E-07 | 2          | Intergenic          |
| cg00437985 | 0.039369   | 0.030787 | 3.57E-07 | 16         | 5'UTR               |
| cg00441754 | 0.428168   | 0.391528 | 1.24E-07 | 19         | Body                |
| cg00448143 | 0.24793    | 0.192633 | 1.47E-07 | 16         | Body                |
| cg00455883 | 0.091243   | 0.06219  | 0.00E+00 | 3          | Promoter-associated |
| cg00459447 | 0.110546   | 0.080947 | 9.00E-09 | 7          | Body                |
| cg00472801 | 0.082911   | 0.060762 | 8.10E-08 | 6          | Body                |
| cg00476986 | 0.277358   | 0.353804 | 6.00E-09 | 6          | Body                |
| cg00498603 | 0.022286   | 0.018668 | 1.65E-07 | 1          | Promoter-associated |
| cg00502932 | 0.118121   | 0.133091 | 3.14E-07 | 1          | Promoter-associated |
| cg00503302 | 0.09551    | 0.072507 | 3.10E-07 | 3          | Intergenic          |

| IlluminaID | Maltreated | Control  | p-value  | Chromosome | CpG site location   |
|------------|------------|----------|----------|------------|---------------------|
| cg00511674 | 0.106595   | 0.087906 | 1.16E-07 | 16         | Intergenic          |
| cg00514514 | 0.785764   | 0.821184 | 0.00E+00 | 16         | Intergenic          |
| cg00525044 | 0.782505   | 0.8065   | 3.22E-07 | 8          | Intergenic          |
| cg00529946 | 0.063309   | 0.040238 | 8.60E-08 | 2          | Promoter-associated |
| cg00538370 | 0.34111    | 0.422673 | 8.00E-09 | 2          | Promoter-associated |
| cg00539325 | 0.464921   | 0.429805 | 2.23E-07 | 6          | Body                |
| cg00544734 | 0.098681   | 0.114067 | 3.69E-07 | 12         | Promoter-associated |
| cg00547077 | 0.098913   | 0.074677 | 1.26E-07 | 19         | Promoter-associated |
| cg00572487 | 0.619185   | 0.573608 | 2.00E-09 | 16         | Body                |
| cg00574907 | 0.042742   | 0.034459 | 2.92E-07 | 2          | Body                |
| cg00598261 | 0.060342   | 0.052764 | 1.40E-08 | 6          | Promoter-associated |
| cg00599266 | 0.816526   | 0.850802 | 0.00E+00 | 4          | Body                |
| cg00599702 | 0.249881   | 0.206258 | 1.00E-09 | 1          | Intergenic          |
| cg00608467 | 0.024768   | 0.018442 | 1.00E-08 | 22         | Body                |
| cg00629514 | 0.236309   | 0.195787 | 2.25E-07 | 6          | Intergenic          |
| cg00637687 | 0.102695   | 0.078877 | 1.41E-07 | 5          | Body                |
| cg00639286 | 0.094654   | 0.073849 | 2.64E-07 | 5          | Promoter-associated |
| cg00649827 | 0.444661   | 0.397784 | 1.75E-07 | 15         | Promoter-associated |
| cg00668227 | 0.05252    | 0.037237 | 5.30E-08 | 1          | 5'UTR               |
| cg00669746 | 0.78652    | 0.809741 | 3.26E-07 | 2          | Intergenic          |
| cg00671225 | 0.693977   | 0.735903 | 0.00E+00 | 6          | Body                |
| cg00687252 | 0.043852   | 0.037143 | 3.98E-07 | 6          | Promoter-associated |
| cg00704288 | 0.148189   | 0.165622 | 2.00E-08 | 1          | Body                |
| cg00704909 | 0.152795   | 0.174749 | 1.40E-07 | 11         | Body                |
| cg00713294 | 0.224389   | 0.283215 | 4.90E-07 | 1          | Body                |
| cg00718440 | 0.115177   | 0.13232  | 8.50E-08 | 9          | Promoter-associated |
| cg00734800 | 0.134749   | 0.156901 | 5.90E-08 | 3          | Body                |
| cg00737992 | 0.834668   | 0.871194 | 6.00E-09 | 20         | Body                |
| cg00742472 | 0.39687    | 0.331614 | 0.00E+00 | 14         | Intergenic          |
| cg00748373 | 0.184057   | 0.115082 | 1.28E-07 | 16         | Body                |
| cg00751288 | 0.090061   | 0.102981 | 8.30E-08 | 5          | Promoter-associated |
| cg00759634 | 0.142521   | 0.104892 | 2.50E-08 | 10         | Intergenic          |
| cg00761755 | 0.09681    | 0.114618 | 3.20E-08 | 17         | Promoter-associated |
| cg00777537 | 0.100716   | 0.115398 | 2.40E-07 | 12         | Body                |
| cg00777895 | 0.450162   | 0.355803 | 1.58E-07 | 1          | Body                |
| cg00786390 | 0.84856    | 0.875532 | 2.30E-08 | 20         | Body                |
| cg00786747 | 0.155691   | 0.126472 | 3.63E-07 | 15         | Intergenic          |
| cg00789423 | 0.284922   | 0.221436 | 1.00E-08 | 1          | Promoter-associated |
| cg00790928 | 0.064173   | 0.052663 | 1.27E-07 | 1          | Body                |
| cg00794178 | 0.019961   | 0.014441 | 6.00E-09 | 3          | Body                |
| cg00814733 | 0.083458   | 0.063306 | 3.70E-08 | 12         | Body                |
| cg00823995 | 0.125504   | 0.140875 | 1.70E-08 | 19         | Promoter-associated |
| cg00829944 | 0.145047   | 0.16613  | 4.42E-07 | 11         | Body                |
| cg00830767 | 0.244391   | 0.187762 | 4.10E-08 | 16         | Intergenic          |
| cg00843623 | 0.087068   | 0.066869 | 2.70E-08 | 19         | Body                |
| cg00873521 | 0.182353   | 0.198667 | 5.20E-08 | 9          | Body                |
| cg00889778 | 0.68008    | 0.619352 | 4.40E-08 | 3          | Intergenic          |
| cg00893385 | 0.117015   | 0.136645 | 1.06E-07 | 11         | Intergenic          |
| cg00903375 | 0.146189   | 0.168442 | 1.60E-08 | 7          | Promoter-associated |
| cg00906435 | 0.083154   | 0.060882 | 3.80E-08 | 17         | Promoter-associated |
| cg00909976 | 0.02967    | 0.025066 | 4.49E-07 | 17         | Promoter-associated |
| cg00913521 | 0.452914   | 0.414151 | 2.80E-07 | 12         | Body                |
| cg00916439 | 0.15375    | 0.208093 | 6.70E-08 | 6          | Body                |

| lluminalID | Maltreated | Control  | p-value  | Chromosome | CpG site location   |
|------------|------------|----------|----------|------------|---------------------|
| cg00922697 | 0.841358   | 0.867127 | 4.00E-09 | 12         | Body                |
| cg00922781 | 0.136958   | 0.158869 | 2.56E-07 | 10         | 5'UTR               |
| cg00923803 | 0.264807   | 0.198984 | 3.16E-07 | 7          | Promoter-associated |
| cg00935924 | 0.398481   | 0.343075 | 1.80E-08 | X          | Promoter-associated |
| cg00949554 | 0.085962   | 0.061749 | 4.90E-08 | 2          | Body                |
| cg00960509 | 0.067766   | 0.049801 | 6.00E-09 | 1          | Promoter-associated |
| cg00960580 | 0.701761   | 0.745047 | 4.00E-08 | 17         | Promoter-associated |
| cg00987699 | 0.142253   | 0.090217 | 6.60E-08 | 7          | Body                |
| cg00994389 | 0.795628   | 0.6869   | 1.23E-07 | 13         | Body                |
| cg00994411 | 0.099763   | 0.07988  | 6.70E-08 | 8          | Promoter-associated |
| cg01025599 | 0.033692   | 0.025637 | 1.18E-07 | 16         | Intergenic          |
| cg01026613 | 0.578487   | 0.519123 | 3.30E-08 | 2          | Promoter-associated |
| cg01035689 | 0.080036   | 0.059445 | 2.84E-07 | 10         | Intergenic          |
| cg01047040 | 0.890309   | 0.834644 | 7.20E-08 | 3          | Intergenic          |
| cg01060358 | 0.169232   | 0.14672  | 8.00E-09 | 13         | Promoter-associated |
| cg01083340 | 0.156298   | 0.180443 | 8.50E-08 | 11         | Intergenic          |
| cg01093329 | 0.119647   | 0.137211 | 6.20E-08 | 2          | Body                |
| cg01116134 | 0.932761   | 0.940148 | 7.30E-08 | 20         | Body                |
| cg01117833 | 0.132203   | 0.089176 | 0.00E+00 | 14         | Body                |
| cg01131038 | 0.203573   | 0.133909 | 1.63E-07 | 8          | Intergenic          |
| cg01135780 | 0.027842   | 0.020191 | 3.40E-08 | 5          | Body                |
| cg01140149 | 0.866466   | 0.888297 | 1.69E-07 | 1          | Intergenic          |
| cg01145709 | 0.204181   | 0.268586 | 3.44E-07 | 7          | Body                |
| cg01149132 | 0.388949   | 0.328097 | 2.32E-07 | 14         | Promoter-associated |
| cg01149896 | 0.124535   | 0.13984  | 4.52E-07 | 4          | Promoter-associated |
| cg01153979 | 0.16602    | 0.130107 | 2.70E-08 | 6          | Promoter-associated |
| cg01158415 | 0.838686   | 0.864324 | 3.60E-08 | 2          | Intergenic          |
| cg01165560 | 0.813713   | 0.842903 | 1.00E-09 | 11         | Intergenic          |
| cg01166350 | 0.461415   | 0.367519 | 2.00E-09 | 14         | Intergenic          |
| cg01179631 | 0.040442   | 0.033399 | 2.00E-09 | 16         | 5'UTR               |
| cg01185138 | 0.702211   | 0.675747 | 2.41E-07 | 15         | Promoter-associated |
| cg01202751 | 0.116127   | 0.130687 | 7.80E-08 | 6          | Promoter-associated |
| cg01216607 | 0.131496   | 0.10823  | 1.83E-07 | 7          | Body                |
| cg01239717 | 0.108663   | 0.079652 | 0.00E+00 | 6          | Body                |
| cg01244944 | 0.158627   | 0.115359 | 5.00E-09 | 4          | Body                |
| cg01249180 | 0.063733   | 0.048459 | 1.37E-07 | 5          | Body                |
| cg01261351 | 0.141825   | 0.11037  | 1.40E-07 | 10         | Body                |
| cg01262133 | 0.227243   | 0.302148 | 2.02E-07 | 6          | Intergenic          |
| cg01279426 | 0.947864   | 0.955995 | 3.14E-07 | 17         | Body                |
| cg01297808 | 0.078657   | 0.058698 | 9.00E-09 | 10         | Intergenic          |
| cg01306985 | 0.134177   | 0.158535 | 2.10E-08 | 6          | Promoter-associated |
| cg01310829 | 0.051419   | 0.04446  | 4.95E-07 | 7          | Body                |
| cg01314194 | 0.115236   | 0.133124 | 3.15E-07 | 1          | Body                |
| cg01320048 | 0.289381   | 0.238845 | 0.00E+00 | 10         | 5'UTR               |
| cg01335042 | 0.11692    | 0.132164 | 1.57E-07 | 19         | Promoter-associated |
| cg01338834 | 0.248594   | 0.179389 | 0.00E+00 | 21         | Promoter-associated |
| cg01353569 | 0.088648   | 0.103592 | 1.45E-07 | 7          | 5'UTR               |
| cg01356981 | 0.799824   | 0.827413 | 4.00E-09 | 16         | Intergenic          |
| cg01358551 | 0.12797    | 0.145616 | 2.36E-07 | 19         | Promoter-associated |
| cg01363714 | 0.067008   | 0.049585 | 1.45E-07 | 14         | Intergenic          |
| cg01365762 | 0.126678   | 0.079431 | 1.30E-08 | 6          | Promoter-associated |
| cg01373292 | 0.025943   | 0.019664 | 2.11E-07 | 1          | Body                |
| cg01373691 | 0.101084   | 0.075464 | 4.00E-09 | 16         | Promoter-associated |

| lluminalID | Maltreated | Control  | p-value  | Chromosome | CpG site location   |
|------------|------------|----------|----------|------------|---------------------|
| cg01393327 | 0.095573   | 0.071265 | 9.00E-09 | 15         | 5'UTR               |
| cg01405143 | 0.097265   | 0.074345 | 2.50E-08 | 19         | Promoter-associated |
| cg01458686 | 0.10052    | 0.114476 | 2.99E-07 | 12         | Intergenic          |
| cg01460557 | 0.281725   | 0.235142 | 6.70E-08 | 5          | Body                |
| cg01462829 | 0.08518    | 0.100006 | 1.52E-07 | 4          | Body                |
| cg01467266 | 0.190155   | 0.159301 | 2.00E-09 | 19         | Body                |
| cg01482912 | 0.522      | 0.484716 | 1.00E-08 | 6          | Body                |
| cg01487433 | 0.10397    | 0.083372 | 1.32E-07 | 19         | Body                |
| cg01488674 | 0.504531   | 0.422114 | 5.00E-09 | 22         | Promoter-associated |
| cg01505312 | 0.779015   | 0.805973 | 7.00E-08 | 11         | Body                |
| cg01519164 | 0.121499   | 0.142666 | 6.00E-09 | 14         | Promoter-associated |
| cg01524091 | 0.120605   | 0.08866  | 1.70E-08 | 6          | Promoter-associated |
| cg01527159 | 0.18129    | 0.156027 | 2.17E-07 | 19         | Intergenic          |
| cg01531665 | 0.093626   | 0.109651 | 1.97E-07 | 9          | Body                |
| cg01542423 | 0.92287    | 0.933165 | 3.27E-07 | 8          | Intergenic          |
| cg01546046 | 0.261216   | 0.186946 | 0.00E+00 | 14         | Body                |
| cg01554453 | 0.319654   | 0.267005 | 1.33E-07 | 6          | Body                |
| cg01566127 | 0.10019    | 0.061556 | 3.20E-07 | 11         | Body                |
| cg01582807 | 0.112168   | 0.127752 | 2.93E-07 | 7          | 5'UTR               |
| cg01588546 | 0.063937   | 0.05507  | 1.40E-08 | 19         | Body                |
| cg01600222 | 0.242783   | 0.182901 | 4.67E-07 | 6          | Intergenic          |
| cg01613965 | 0.363785   | 0.325534 | 7.00E-09 | 2          | Body                |
| cg01638175 | 0.18668    | 0.150295 | 0.00E+00 | 3          | Body                |
| cg01638235 | 0.743099   | 0.771945 | 3.32E-07 | 12         | Intergenic          |
| cg01645753 | 0.049937   | 0.037934 | 2.21E-07 | 15         | Body                |
| cg01660676 | 0.164947   | 0.126891 | 1.90E-08 | 7          | Intergenic          |
| cg01663225 | 0.050314   | 0.044863 | 2.04E-07 | 11         | Body                |
| cg01684233 | 0.697065   | 0.609748 | 5.70E-08 | 3          | Body                |
| cg01719123 | 0.139431   | 0.111105 | 1.60E-08 | 8          | Promoter-associated |
| cg01726103 | 0.189681   | 0.213532 | 1.11E-07 | 6          | Body                |
| cg01747036 | 0.806428   | 0.846972 | 5.00E-09 | 13         | 3'UTR               |
| cg01755728 | 0.124786   | 0.105351 | 2.16E-07 | 3          | Body                |
| cg01759562 | 0.120351   | 0.099852 | 1.20E-08 | 12         | Intergenic          |
| cg01766908 | 0.093794   | 0.073958 | 2.91E-07 | 16         | Intergenic          |
| cg01768179 | 0.116931   | 0.134257 | 4.00E-08 | 7          | 5'UTR               |
| cg01769354 | 0.791298   | 0.813747 | 4.67E-07 | 16         | Intergenic          |
| cg01773951 | 0.08086    | 0.092166 | 1.07E-07 | 1          | Promoter-associated |
| cg01777630 | 0.144512   | 0.161921 | 7.50E-08 | 16         | Promoter-associated |
| cg01779076 | 0.390536   | 0.347516 | 5.20E-08 | 2          | Body                |
| cg01789478 | 0.166178   | 0.13101  | 3.09E-07 | 2          | Body                |
| cg01793617 | 0.909667   | 0.921575 | 1.45E-07 | 1          | Body                |
| cg01796104 | 0.04651    | 0.039282 | 5.40E-08 | 6          | Body                |
| cg01807919 | 0.183486   | 0.208313 | 1.68E-07 | 17         | Promoter-associated |
| cg01814186 | 0.156383   | 0.177066 | 3.58E-07 | 16         | Body                |
| cg01816191 | 0.794316   | 0.677484 | 2.78E-07 | 3          | Body                |
| cg01819787 | 0.607253   | 0.570234 | 3.74E-07 | X          | Body                |
| cg01823956 | 0.023206   | 0.017909 | 3.00E-08 | 14         | 5'UTR               |
| cg01861096 | 0.115562   | 0.097232 | 2.30E-07 | 22         | 5'UTR               |
| cg01906015 | 0.085034   | 0.072337 | 6.00E-09 | 8          | Body                |
| cg01909487 | 0.139574   | 0.157219 | 4.08E-07 | 1          | Promoter-associated |
| cg01923740 | 0.144987   | 0.166062 | 2.06E-07 | 19         | Body                |
| cg01932076 | 0.259788   | 0.223188 | 2.83E-07 | 21         | Intergenic          |
| cg01933421 | 0.859455   | 0.802994 | 6.00E-09 | 14         | Intergenic          |

| lluminalID | Maltreated | Control  | p-value  | Chromosome | CpG site location   |
|------------|------------|----------|----------|------------|---------------------|
| cg01936090 | 0.127334   | 0.115486 | 1.83E-07 | 1          | Promoter-associated |
| cg01939479 | 0.148056   | 0.168721 | 4.53E-07 | 15         | Body                |
| cg01939664 | 0.067674   | 0.057878 | 2.61E-07 | 1          | Body                |
| cg01945391 | 0.023996   | 0.017639 | 2.60E-08 | 5          | Promoter-associated |
| cg01959412 | 0.146926   | 0.100141 | 4.00E-09 | 4          | 5'UTR               |
| cg01981108 | 0.72559    | 0.586705 | 1.64E-07 | 8          | Intergenic          |
| cg01999086 | 0.346428   | 0.283663 | 1.30E-08 | 20         | Promoter-associated |
| cg02002494 | 0.119223   | 0.138391 | 2.98E-07 | 3          | Body                |
| cg02015876 | 0.064698   | 0.049964 | 6.90E-08 | 15         | Body                |
| cg02047359 | 0.135563   | 0.155362 | 4.81E-07 | 10         | Promoter-associated |
| cg02048674 | 0.148442   | 0.17338  | 1.83E-07 | 19         | Body                |
| cg02051077 | 0.319172   | 0.269831 | 2.79E-07 | 7          | 5'UTR               |
| cg02051553 | 0.738152   | 0.790009 | 0.00E+00 | 1          | 3'UTR               |
| cg02053340 | 0.093602   | 0.065665 | 2.49E-07 | 20         | Promoter-associated |
| cg02056921 | 0.125601   | 0.142825 | 1.84E-07 | 1          | 5'UTR               |
| cg02065970 | 0.69369    | 0.654365 | 1.40E-08 | 2          | Intergenic          |
| cg02096656 | 0.129672   | 0.097746 | 3.30E-08 | 7          | Body                |
| cg02120584 | 0.233435   | 0.203916 | 5.50E-08 | 2          | Body                |
| cg02121330 | 0.159595   | 0.178769 | 4.80E-07 | 14         | Promoter-associated |
| cg02136723 | 0.684668   | 0.649307 | 7.60E-08 | 3          | Intergenic          |
| cg02137583 | 0.903904   | 0.925167 | 0.00E+00 | 16         | Intergenic          |
| cg02151625 | 0.16729    | 0.148389 | 2.80E-08 | 6          | Body                |
| cg02157667 | 0.089156   | 0.103522 | 6.20E-08 | 16         | Body                |
| cg02172824 | 0.285976   | 0.248018 | 2.79E-07 | 16         | Promoter-associated |
| cg02181963 | 0.073184   | 0.06234  | 1.93E-07 | 13         | Promoter-associated |
| cg02187712 | 0.890836   | 0.90988  | 3.67E-07 | 6          | Intergenic          |
| cg02199589 | 0.035022   | 0.024194 | 4.28E-07 | 7          | 5'UTR               |
| cg02201215 | 0.121456   | 0.085508 | 2.00E-09 | 14         | Body                |
| cg02210038 | 0.816267   | 0.853934 | 1.10E-08 | 22         | Body                |
| cg02239805 | 0.075931   | 0.057488 | 2.01E-07 | 7          | Body                |
| cg02243437 | 0.144179   | 0.117638 | 3.80E-07 | 10         | Body                |
| cg02248325 | 0.20056    | 0.260914 | 3.35E-07 | 16         | Promoter-associated |
| cg02257675 | 0.319958   | 0.256043 | 1.06E-07 | 19         | Body                |
| cg02261604 | 0.098378   | 0.112987 | 6.20E-08 | 17         | 5'UTR               |
| cg02265379 | 0.299343   | 0.241097 | 3.57E-07 | 5          | Body                |
| cg02268424 | 0.135673   | 0.151728 | 4.43E-07 | 19         | Promoter-associated |
| cg02269221 | 0.104377   | 0.119726 | 4.20E-07 | 17         | Body                |
| cg02269272 | 0.109915   | 0.125735 | 2.80E-08 | 17         | Promoter-associated |
| cg02269636 | 0.676578   | 0.70647  | 1.82E-07 | 17         | Body                |
| cg02271227 | 0.123121   | 0.098174 | 4.00E-09 | 10         | Intergenic          |
| cg02283485 | 0.057877   | 0.041549 | 1.81E-07 | 10         | Body                |
| cg02291403 | 0.078309   | 0.091961 | 4.50E-08 | 12         | Body                |
| cg02297747 | 0.40835    | 0.341402 | 1.10E-07 | 17         | Intergenic          |
| cg02308112 | 0.144596   | 0.162608 | 4.20E-08 | 1          | 5'UTR               |
| cg02323694 | 0.114537   | 0.128621 | 4.68E-07 | 12         | Body                |
| cg02327123 | 0.12714    | 0.142669 | 1.98E-07 | 7          | Body                |
| cg02334926 | 0.108303   | 0.129136 | 4.06E-07 | 5          | Body                |
| cg02337499 | 0.105444   | 0.09164  | 2.82E-07 | 11         | Promoter-associated |
| cg02339297 | 0.113708   | 0.090149 | 3.05E-07 | 12         | Body                |
| cg02350644 | 0.708422   | 0.744854 | 6.70E-08 | 2          | Intergenic          |
| cg02351018 | 0.764877   | 0.701919 | 2.47E-07 | 17         | Intergenic          |
| cg02374837 | 0.144893   | 0.171029 | 1.24E-07 | 16         | Promoter-associated |
| cg02385840 | 0.089954   | 0.057981 | 9.60E-08 | 12         | Intergenic          |

| lluminalID | Maltreated | Control  | p-value  | Chromosome | CpG site location   |
|------------|------------|----------|----------|------------|---------------------|
| cg02386183 | 0.077022   | 0.056909 | 9.40E-08 | 20         | Promoter-associated |
| cg02390278 | 0.884625   | 0.899296 | 1.50E-08 | 8          | 5'UTR               |
| cg02396143 | 0.08454    | 0.062135 | 1.00E-08 | 1          | Promoter-associated |
| cg02399652 | 0.13729    | 0.156006 | 3.32E-07 | 3          | Body                |
| cg02405530 | 0.050702   | 0.041304 | 0.00E+00 | 4          | Body                |
| cg02411582 | 0.894463   | 0.913739 | 4.47E-07 | 16         | 3'UTR               |
| cg02426912 | 0.229023   | 0.16971  | 0.00E+00 | 16         | Promoter-associated |
| cg02429398 | 0.080254   | 0.05945  | 3.40E-08 | 16         | Body                |
| cg02432101 | 0.869761   | 0.8881   | 0.00E+00 | 18         | Body                |
| cg02445447 | 0.104091   | 0.071026 | 6.00E-08 | 2          | 5'UTR               |
| cg02446681 | 0.091079   | 0.069626 | 2.30E-08 | 16         | Body                |
| cg02453779 | 0.112773   | 0.084333 | 1.90E-08 | 11         | Body                |
| cg02473395 | 0.105276   | 0.124603 | 2.00E-09 | 12         | Promoter-associated |
| cg02475998 | 0.740949   | 0.769897 | 2.80E-08 | 7          | Intergenic          |
| cg02484047 | 0.122202   | 0.137662 | 2.48E-07 | 19         | Body                |
| cg02493614 | 0.109379   | 0.131705 | 2.12E-07 | 2          | Promoter-associated |
| cg02505596 | 0.761084   | 0.790076 | 8.90E-08 | 7          | Intergenic          |
| cg02507657 | 0.8976     | 0.913952 | 5.20E-08 | 2          | Intergenic          |
| cg02510736 | 0.221324   | 0.174433 | 6.90E-08 | 10         | Promoter-associated |
| cg02521102 | 0.249948   | 0.282191 | 5.80E-08 | 4          | Body                |
| cg02537106 | 0.17378    | 0.140755 | 8.50E-08 | 6          | Body                |
| cg02542103 | 0.724968   | 0.665386 | 4.94E-07 | 6          | Intergenic          |
| cg02558424 | 0.14241    | 0.118097 | 1.40E-08 | 15         | Intergenic          |
| cg02561482 | 0.229173   | 0.16633  | 1.90E-08 | 6          | 3'UTR               |
| cg02569759 | 0.349149   | 0.282214 | 3.09E-07 | 3          | 5'UTR               |
| cg02578312 | 0.365813   | 0.451307 | 1.90E-08 | 8          | Promoter-associated |
| cg02590295 | 0.125026   | 0.140037 | 1.41E-07 | 8          | Promoter-associated |
| cg02596190 | 0.410376   | 0.316732 | 2.00E-09 | 15         | Body                |
| cg02602480 | 0.085522   | 0.099663 | 2.50E-08 | 2          | Promoter-associated |
| cg02603784 | 0.897732   | 0.914805 | 1.52E-07 | 3          | Body                |
| cg02619495 | 0.906454   | 0.921217 | 1.10E-07 | 1          | Body                |
| cg02620228 | 0.175986   | 0.242061 | 9.00E-09 | X          | Promoter-associated |
| cg02621020 | 0.103283   | 0.122405 | 1.00E-09 | 8          | Promoter-associated |
| cg02631680 | 0.056327   | 0.042704 | 2.55E-07 | 6          | Body                |
| cg02632809 | 0.137833   | 0.107355 | 7.30E-08 | 7          | Promoter-associated |
| cg02639619 | 0.751865   | 0.779763 | 1.40E-08 | X          | Body                |
| cg02642298 | 0.429588   | 0.327984 | 0.00E+00 | 2          | Promoter-associated |
| cg02646394 | 0.426519   | 0.345898 | 1.48E-07 | 2          | Body                |
| cg02646665 | 0.49566    | 0.454137 | 3.00E-09 | 7          | Body                |
| cg02650266 | 0.050683   | 0.038491 | 1.63E-07 | 4          | Intergenic          |
| cg02661258 | 0.034982   | 0.024934 | 2.70E-08 | 5          | Promoter-associated |
| cg02661426 | 0.040837   | 0.034674 | 2.00E-09 | 1          | Body                |
| cg02668708 | 0.035722   | 0.024488 | 7.40E-08 | 9          | Promoter-associated |
| cg02671671 | 0.07081    | 0.056352 | 3.14E-07 | 19         | Promoter-associated |
| cg02675466 | 0.873261   | 0.892822 | 6.40E-08 | 16         | Body                |
| cg02683363 | 0.15963    | 0.180981 | 2.62E-07 | 19         | Promoter-associated |
| cg02697074 | 0.146951   | 0.165002 | 2.45E-07 | 17         | Body                |
| cg02707669 | 0.068461   | 0.052383 | 3.60E-08 | 13         | Body                |
| cg02709717 | 0.695998   | 0.659779 | 1.20E-08 | 8          | Promoter-associated |
| cg02716799 | 0.110404   | 0.125369 | 1.60E-08 | 4          | Promoter-associated |
| cg02717570 | 0.169225   | 0.191422 | 8.30E-08 | 17         | Body                |
| cg02723904 | 0.072022   | 0.05451  | 4.81E-07 | 3          | Promoter-associated |
| cg02727104 | 0.093198   | 0.072826 | 2.73E-07 | 13         | Intergenic          |

| IlluminaID | Maltreated | Control  | p-value  | Chromosome | CpG site location   |
|------------|------------|----------|----------|------------|---------------------|
| cg02736602 | 0.080472   | 0.056829 | 0.00E+00 | 1          | Body                |
| cg02763798 | 0.061906   | 0.048238 | 7.00E-09 | 12         | Promoter-associated |
| cg02768390 | 0.842316   | 0.863638 | 4.97E-07 | 19         | Body                |
| cg02773019 | 0.186542   | 0.207477 | 3.12E-07 | 3          | 5'UTR               |
| cg02778551 | 0.82867    | 0.852803 | 4.70E-07 | 7          | Body                |
| cg02788401 | 0.066037   | 0.05273  | 1.58E-07 | 17         | Promoter-associated |
| cg02792602 | 0.259776   | 0.192472 | 0.00E+00 | 2          | Body                |
| cg02836487 | 0.146537   | 0.16453  | 8.90E-08 | 3          | Body                |
| cg02846228 | 0.87291    | 0.900649 | 0.00E+00 | 16         | Body                |
| cg02859866 | 0.146486   | 0.170551 | 6.00E-08 | 10         | Body                |
| cg02862354 | 0.156177   | 0.173768 | 1.95E-07 | 3          | Promoter-associated |
| cg02863073 | 0.060411   | 0.044681 | 4.60E-08 | 19         | Body                |
| cg02870950 | 0.196383   | 0.154716 | 1.00E-08 | 10         | Body                |
| cg02877856 | 0.851112   | 0.880356 | 2.60E-08 | 16         | Intergenic          |
| cg02878439 | 0.062673   | 0.048773 | 2.78E-07 | 16         | Promoter-associated |
| cg02896705 | 0.30932    | 0.231376 | 0.00E+00 | 19         | Promoter-associated |
| cg02898122 | 0.047805   | 0.035225 | 5.00E-07 | 1          | Promoter-associated |
| cg02916409 | 0.232152   | 0.185139 | 8.00E-09 | 16         | Promoter-associated |
| cg02925229 | 0.155636   | 0.120701 | 1.56E-07 | 3          | Body                |
| cg02925427 | 0.753745   | 0.780868 | 4.00E-09 | 16         | Intergenic          |
| cg02929209 | 0.132017   | 0.099019 | 5.00E-09 | 4          | Intergenic          |
| cg02936451 | 0.112223   | 0.093098 | 2.59E-07 | 4          | Intergenic          |
| cg02938524 | 0.140149   | 0.159697 | 4.20E-07 | 14         | 5'UTR               |
| cg02952317 | 0.677611   | 0.72994  | 9.40E-08 | 12         | Intergenic          |
| cg02955287 | 0.26619    | 0.203553 | 4.60E-07 | 16         | Intergenic          |
| cg02964396 | 0.028902   | 0.023705 | 1.76E-07 | 19         | Promoter-associated |
| cg02976543 | 0.138723   | 0.160011 | 9.30E-08 | 2          | Promoter-associated |
| cg02994645 | 0.22373    | 0.258848 | 3.18E-07 | 8          | Body                |
| cg02996314 | 0.049708   | 0.039548 | 8.00E-09 | 1          | Promoter-associated |
| cg03004280 | 0.056766   | 0.039161 | 2.88E-07 | 16         | Promoter-associated |
| cg03015433 | 0.035578   | 0.02645  | 1.00E-07 | 16         | Body                |
| cg03031933 | 0.067922   | 0.056572 | 3.00E-08 | 8          | Body                |
| cg03041860 | 0.167546   | 0.186021 | 4.00E-08 | 2          | Body                |
| cg03044510 | 0.05681    | 0.045309 | 4.93E-07 | 21         | Body                |
| cg03052431 | 0.734935   | 0.700544 | 3.00E-08 | 7          | Intergenic          |
| cg03053597 | 0.141237   | 0.179555 | 4.30E-08 | 1          | Intergenic          |
| cg03061024 | 0.105498   | 0.119862 | 2.98E-07 | 3          | Body                |
| cg03067068 | 0.109397   | 0.123695 | 7.00E-09 | 16         | Promoter-associated |
| cg03069383 | 0.211105   | 0.179895 | 2.00E-09 | 2          | Promoter-associated |
| cg03071924 | 0.816482   | 0.846802 | 1.97E-07 | 8          | Body                |
| cg03072621 | 0.123644   | 0.101467 | 1.04E-07 | 16         | Body                |
| cg03108496 | 0.099871   | 0.11539  | 5.00E-08 | 1          | Intergenic          |
| cg03118206 | 0.057165   | 0.044274 | 1.79E-07 | 6          | Body                |
| cg03121168 | 0.162018   | 0.1319   | 1.70E-07 | 20         | 5'UTR               |
| cg03128332 | 0.23643    | 0.16887  | 5.00E-08 | 1          | Body                |
| cg03144560 | 0.493225   | 0.405258 | 2.88E-07 | 20         | Promoter-associated |
| cg03160466 | 0.113403   | 0.0892   | 5.00E-09 | 4          | Body                |
| cg03174294 | 0.109656   | 0.08568  | 1.46E-07 | 8          | 5'UTR               |
| cg03175653 | 0.118149   | 0.09287  | 1.10E-07 | 18         | Body                |
| cg03181118 | 0.497178   | 0.417182 | 1.70E-08 | 3          | 5'UTR               |
| cg03183872 | 0.031557   | 0.022891 | 1.00E-09 | 20         | Body                |
| cg03184439 | 0.149979   | 0.169689 | 4.95E-07 | 17         | Promoter-associated |
| cg03186339 | 0.277543   | 0.243841 | 1.00E-09 | 6          | Intergenic          |



| IlluminaID | Maltreated | Control  | p-value  | Chromosome | CpG site location   |
|------------|------------|----------|----------|------------|---------------------|
| cg03214080 | 0.114455   | 0.130845 | 2.51E-07 | 8          | Intergenic          |
| cg03220945 | 0.116539   | 0.079708 | 2.80E-08 | 1          | Body                |
| cg03222971 | 0.128863   | 0.093377 | 6.20E-08 | 2          | Body                |
| cg03230579 | 0.71039    | 0.747921 | 1.00E-09 | 10         | Body                |
| cg03239591 | 0.074639   | 0.086978 | 1.07E-07 | 6          | Promoter-associated |
| cg03259243 | 0.243001   | 0.182196 | 0.00E+00 | 17         | Intergenic          |
| cg03262242 | 0.085314   | 0.051621 | 3.30E-08 | 1          | Promoter-associated |
| cg03276167 | 0.119193   | 0.140467 | 5.00E-09 | 6          | Body                |
| cg03289801 | 0.820915   | 0.854351 | 3.83E-07 | 11         | Intergenic          |
| cg03301282 | 0.312933   | 0.412329 | 1.80E-08 | 8          | Promoter-associated |
| cg03309721 | 0.096791   | 0.112835 | 2.44E-07 | 19         | Body                |
| cg03322872 | 0.451159   | 0.413153 | 3.73E-07 | 2          | Intergenic          |
| cg03325014 | 0.559892   | 0.448741 | 8.70E-08 | 17         | Intergenic          |
| cg03330867 | 0.150018   | 0.172987 | 3.38E-07 | 16         | 5'UTR               |
| cg03339016 | 0.152917   | 0.174018 | 1.10E-07 | 22         | Promoter-associated |
| cg03352657 | 0.146245   | 0.118498 | 9.30E-08 | 17         | Body                |
| cg03353863 | 0.716702   | 0.743089 | 2.58E-07 | 19         | Body                |
| cg03361633 | 0.819732   | 0.853585 | 4.10E-08 | 16         | Intergenic          |
| cg03373091 | 0.047815   | 0.037137 | 6.00E-08 | 22         | Promoter-associated |
| cg03383661 | 0.13602    | 0.154096 | 1.93E-07 | 6          | Promoter-associated |
| cg03394401 | 0.160749   | 0.105156 | 4.10E-08 | 6          | Body                |
| cg03410772 | 0.87549    | 0.89953  | 3.00E-09 | 6          | Body                |
| cg03415695 | 0.046438   | 0.037212 | 3.05E-07 | 22         | Promoter-associated |
| cg03420286 | 0.069412   | 0.06001  | 7.50E-08 | 15         | Body                |
| cg03426840 | 0.084938   | 0.06136  | 1.60E-08 | 11         | Promoter-associated |
| cg03433712 | 0.04309    | 0.032935 | 2.60E-07 | 15         | Body                |
| cg03442378 | 0.093358   | 0.074892 | 2.00E-09 | 11         | Body                |
| cg03462171 | 0.300616   | 0.23694  | 5.00E-09 | 16         | Body                |
| cg03463778 | 0.489289   | 0.404347 | 9.00E-09 | 10         | Body                |
| cg03468541 | 0.197393   | 0.15571  | 2.90E-08 | 14         | Body                |
| cg03489495 | 0.094796   | 0.109548 | 2.05E-07 | 6          | Promoter-associated |
| cg03508908 | 0.063487   | 0.043346 | 1.22E-07 | 6          | Body                |
| cg03533382 | 0.135046   | 0.151936 | 2.78E-07 | 5          | Body                |
| cg03542721 | 0.199094   | 0.173527 | 1.00E-09 | 8          | Body                |
| cg03555487 | 0.686805   | 0.712213 | 3.63E-07 | 14         | Body                |
| cg03575764 | 0.130129   | 0.148228 | 2.58E-07 | 2          | Intergenic          |
| cg03576787 | 0.057695   | 0.043651 | 9.40E-08 | 11         | Promoter-associated |
| cg03591798 | 0.113815   | 0.127195 | 3.32E-07 | 2          | Intergenic          |
| cg03592197 | 0.138951   | 0.100887 | 4.00E-09 | 19         | Promoter-associated |
| cg03598754 | 0.094328   | 0.072297 | 1.54E-07 | 17         | Promoter-associated |
| cg03599547 | 0.113392   | 0.080791 | 2.50E-08 | 12         | Promoter-associated |
| cg03609269 | 0.147271   | 0.165401 | 7.70E-08 | 1          | Body                |
| cg03612039 | 0.154668   | 0.128187 | 2.33E-07 | 19         | Body                |
| cg03614734 | 0.140617   | 0.159422 | 1.05E-07 | 1          | Body                |
| cg03623155 | 0.076321   | 0.057982 | 2.91E-07 | 15         | Body                |
| cg03628186 | 0.178297   | 0.157649 | 1.00E-09 | 17         | Promoter-associated |
| cg03634887 | 0.139699   | 0.155308 | 6.80E-08 | 16         | Promoter-associated |
| cg03637815 | 0.193012   | 0.120973 | 3.00E-09 | 13         | Intergenic          |
| cg03638905 | 0.090128   | 0.063294 | 3.00E-08 | 5          | Intergenic          |
| cg03644750 | 0.931224   | 0.945534 | 1.98E-07 | 16         | Body                |
| cg03646922 | 0.037531   | 0.029088 | 7.40E-08 | 17         | Promoter-associated |
| cg03648679 | 0.149424   | 0.205146 | 2.14E-07 | 16         | Promoter-associated |
| cg03650154 | 0.02314    | 0.018752 | 7.00E-09 | 19         | Promoter-associated |

| lluminalID | Maltreated | Control  | p-value  | Chromosome | CpG site location   |
|------------|------------|----------|----------|------------|---------------------|
| cg03655371 | 0.263359   | 0.185393 | 2.58E-07 | 5          | Intergenic          |
| cg03668558 | 0.423034   | 0.366957 | 1.25E-07 | 20         | Intergenic          |
| cg03674076 | 0.352621   | 0.299028 | 1.77E-07 | 20         | Body                |
| cg03689054 | 0.03435    | 0.026021 | 2.90E-08 | 17         | Body                |
| cg03696599 | 0.06378    | 0.053181 | 3.29E-07 | 2          | Body                |
| cg03700121 | 0.327797   | 0.258645 | 1.80E-08 | 11         | Promoter-associated |
| cg03705947 | 0.166338   | 0.194238 | 2.33E-07 | 1          | Body                |
| cg03716738 | 0.797985   | 0.715359 | 8.90E-08 | 10         | Body                |
| cg03720887 | 0.176502   | 0.200854 | 1.00E-09 | 8          | Body                |
| cg03729853 | 0.13459    | 0.154231 | 1.46E-07 | 12         | Intergenic          |
| cg03730280 | 0.781275   | 0.740838 | 1.80E-08 | 4          | Intergenic          |
| cg03746482 | 0.286863   | 0.229825 | 0.00E+00 | 10         | Intergenic          |
| cg03747177 | 0.114212   | 0.128995 | 1.02E-07 | 16         | Body                |
| cg03750606 | 0.158002   | 0.179332 | 4.73E-07 | 1          | Body                |
| cg03761477 | 0.261185   | 0.229741 | 7.10E-08 | 6          | Intergenic          |
| cg03765692 | 0.034529   | 0.025387 | 4.00E-09 | 2          | Promoter-associated |
| cg03771185 | 0.147591   | 0.16353  | 4.33E-07 | 4          | Intergenic          |
| cg03808043 | 0.565198   | 0.530055 | 7.00E-09 | 4          | Body                |
| cg03809994 | 0.059965   | 0.036151 | 1.20E-07 | 4          | Body                |
| cg03820205 | 0.073762   | 0.051746 | 2.00E-08 | 10         | Body                |
| cg03820828 | 0.104446   | 0.076534 | 1.22E-07 | 2          | Body                |
| cg03829216 | 0.609556   | 0.529446 | 0.00E+00 | X          | Body                |
| cg03837726 | 0.772898   | 0.819073 | 1.30E-08 | 12         | Intergenic          |
| cg03858673 | 0.183913   | 0.148389 | 2.63E-07 | 6          | Intergenic          |
| cg03876032 | 0.219517   | 0.184726 | 3.60E-08 | 10         | 3'UTR               |
| cg03891268 | 0.767064   | 0.719225 | 4.55E-07 | 3          | Intergenic          |
| cg03891330 | 0.159716   | 0.181705 | 2.52E-07 | 8          | Body                |
| cg03919779 | 0.428531   | 0.314394 | 4.10E-08 | 17         | Promoter-associated |
| cg03921416 | 0.111377   | 0.125083 | 4.97E-07 | 12         | Intergenic          |
| cg03940157 | 0.033975   | 0.026951 | 2.00E-08 | 17         | Body                |
| cg03967192 | 0.036976   | 0.028225 | 4.30E-08 | 2          | Body                |
| cg03968699 | 0.145124   | 0.106694 | 4.10E-08 | X          | Promoter-associated |
| cg03973167 | 0.051049   | 0.043865 | 2.40E-08 | 4          | 5'UTR               |
| cg03982544 | 0.048952   | 0.039872 | 2.74E-07 | 11         | Body                |
| cg03983647 | 0.115065   | 0.130268 | 2.43E-07 | 5          | 5'UTR               |
| cg03985484 | 0.820829   | 0.846566 | 2.60E-08 | 2          | Body                |
| cg04004632 | 0.343904   | 0.401835 | 2.47E-07 | 2          | Body                |
| cg04004830 | 0.16837    | 0.105281 | 1.21E-07 | 2          | Body                |
| cg04013089 | 0.660887   | 0.504993 | 8.00E-09 | 12         | Body                |
| cg04015759 | 0.129488   | 0.099861 | 1.20E-08 | 2          | Body                |
| cg04020984 | 0.237265   | 0.179131 | 3.40E-08 | 6          | Body                |
| cg04027074 | 0.052884   | 0.042375 | 3.03E-07 | 6          | Promoter-associated |
| cg04033706 | 0.148067   | 0.16993  | 7.70E-08 | 9          | Promoter-associated |
| cg04047221 | 0.040564   | 0.026917 | 1.38E-07 | 13         | Body                |
| cg04053862 | 0.100133   | 0.081526 | 2.68E-07 | 2          | Promoter-associated |
| cg04061197 | 0.130112   | 0.151317 | 4.70E-08 | 8          | Promoter-associated |
| cg04063589 | 0.252296   | 0.205526 | 4.25E-07 | 5          | Body                |
| cg04071446 | 0.126841   | 0.148091 | 1.00E-09 | 10         | Promoter-associated |
| cg04072768 | 0.14035    | 0.122022 | 9.40E-08 | 2          | 5'UTR               |
| cg04100724 | 0.145184   | 0.166428 | 1.30E-08 | 12         | Body                |
| cg04104609 | 0.205913   | 0.173819 | 3.26E-07 | 2          | Body                |
| cg04111177 | 0.117786   | 0.140295 | 2.19E-07 | 5          | Body                |
| cg04121495 | 0.038824   | 0.031419 | 1.44E-07 | 4          | Body                |

| IlluminaID | Maltreated | Control  | p-value  | Chromosome | CpG site location   |
|------------|------------|----------|----------|------------|---------------------|
| cg04125208 | 0.126802   | 0.142268 | 3.20E-07 | 11         | Body                |
| cg04128307 | 0.2995     | 0.222638 | 3.00E-09 | 16         | Promoter-associated |
| cg04131734 | 0.061288   | 0.045131 | 3.40E-08 | 11         | Promoter-associated |
| cg04132452 | 0.329766   | 0.280805 | 8.00E-09 | 3          | Body                |
| cg04173992 | 0.857807   | 0.827831 | 0.00E+00 | 5          | 5'UTR               |
| cg04184107 | 0.881172   | 0.857619 | 1.25E-07 | 10         | Intergenic          |
| cg04188862 | 0.243451   | 0.190266 | 9.30E-08 | 15         | Intergenic          |
| cg04202802 | 0.070589   | 0.051225 | 1.10E-08 | 6          | Body                |
| cg04215179 | 0.246183   | 0.175697 | 3.00E-08 | 7          | Body                |
| cg04232674 | 0.098577   | 0.110247 | 1.50E-07 | 1          | Body                |
| cg04237075 | 0.111042   | 0.127997 | 1.60E-08 | 9          | Promoter-associated |
| cg04240267 | 0.121059   | 0.14308  | 1.90E-08 | 13         | Intergenic          |
| cg04260924 | 0.221896   | 0.290205 | 1.78E-07 | 2          | Body                |
| cg04265407 | 0.176557   | 0.199392 | 3.04E-07 | 20         | Promoter-associated |
| cg04266779 | 0.153482   | 0.177103 | 1.36E-07 | 10         | Body                |
| cg04266864 | 0.095323   | 0.070678 | 4.80E-07 | 17         | Promoter-associated |
| cg04278444 | 0.781803   | 0.804396 | 3.64E-07 | 15         | Body                |
| cg04285493 | 0.293381   | 0.23993  | 2.00E-09 | 10         | Intergenic          |
| cg04298626 | 0.127709   | 0.142806 | 4.90E-07 | 10         | Promoter-associated |
| cg04311227 | 0.15524    | 0.176211 | 2.79E-07 | 1          | Body                |
| cg04314525 | 0.109142   | 0.124871 | 1.00E-09 | 22         | Promoter-associated |
| cg04317977 | 0.096654   | 0.109055 | 5.70E-08 | 8          | Promoter-associated |
| cg04324758 | 0.069694   | 0.051828 | 2.00E-09 | 19         | Body                |
| cg04328477 | 0.053058   | 0.040998 | 2.70E-08 | 16         | Body                |
| cg04331511 | 0.731451   | 0.772728 | 3.29E-07 | 6          | Body                |
| cg04333213 | 0.146415   | 0.111914 | 1.90E-08 | 2          | Body                |
| cg04337412 | 0.06206    | 0.049845 | 2.26E-07 | 20         | Body                |
| cg04344565 | 0.040281   | 0.033676 | 2.61E-07 | 8          | Body                |
| cg04347820 | 0.799679   | 0.68019  | 3.04E-07 | 1          | Body                |
| cg04349117 | 0.727632   | 0.76322  | 2.00E-09 | 15         | 5'UTR               |
| cg04351185 | 0.673149   | 0.627699 | 4.13E-07 | 7          | Intergenic          |
| cg04358923 | 0.065508   | 0.04764  | 0.00E+00 | 11         | Body                |
| cg04364540 | 0.119245   | 0.138661 | 4.30E-08 | 10         | Promoter-associated |
| cg04366385 | 0.15203    | 0.120588 | 1.56E-07 | 4          | Body                |
| cg04373587 | 0.35624    | 0.275254 | 3.51E-07 | X          | Body                |
| cg04386144 | 0.053259   | 0.04019  | 1.00E-09 | 6          | Body                |
| cg04413644 | 0.067102   | 0.052224 | 8.00E-08 | 1          | Intergenic          |
| cg04421424 | 0.132842   | 0.150739 | 6.40E-08 | 19         | Body                |
| cg04426007 | 0.131673   | 0.154592 | 4.33E-07 | 4          | Promoter-associated |
| cg04428535 | 0.144465   | 0.110052 | 2.00E-08 | 19         | 5'UTR               |
| cg04431387 | 0.111911   | 0.088653 | 2.91E-07 | 22         | Body                |
| cg04434568 | 0.108482   | 0.124546 | 9.50E-08 | 17         | Body                |
| cg04437590 | 0.273504   | 0.32543  | 3.02E-07 | 7          | Promoter-associated |
| cg04454285 | 0.315699   | 0.23167  | 1.86E-07 | 16         | Intergenic          |
| cg04463911 | 0.786337   | 0.677273 | 1.20E-07 | 6          | Intergenic          |
| cg04470905 | 0.091731   | 0.059734 | 3.50E-07 | 7          | Body                |
| cg04484579 | 0.173847   | 0.190939 | 1.39E-07 | 1          | Body                |
| cg04498032 | 0.120187   | 0.143466 | 4.00E-09 | 1          | Promoter-associated |
| cg04515913 | 0.228153   | 0.194408 | 3.23E-07 | 15         | Promoter-associated |
| cg04531254 | 0.094849   | 0.108326 | 4.45E-07 | 11         | Body                |
| cg04533214 | 0.569026   | 0.511062 | 0.00E+00 | 3          | Body                |
| cg04534813 | 0.088934   | 0.10466  | 1.24E-07 | 9          | Body                |
| cg04539241 | 0.125038   | 0.147188 | 4.50E-07 | 17         | Promoter-associated |

| IlluminaID | Maltreated | Control  | p-value  | Chromosome | CpG site location   |
|------------|------------|----------|----------|------------|---------------------|
| cg04547205 | 0.034287   | 0.025786 | 7.10E-08 | 19         | Body                |
| cg04559178 | 0.134313   | 0.153665 | 1.17E-07 | 12         | Intergenic          |
| cg04565464 | 0.15577    | 0.117369 | 7.20E-08 | 8          | Promoter-associated |
| cg04568613 | 0.401059   | 0.339239 | 3.44E-07 | 3          | Intergenic          |
| cg04576847 | 0.611377   | 0.648516 | 4.00E-09 | 17         | Body                |
| cg04584833 | 0.123304   | 0.145094 | 3.00E-08 | 17         | Body                |
| cg04585390 | 0.710518   | 0.773361 | 2.81E-07 | 17         | Body                |
| cg04617570 | 0.076835   | 0.092516 | 1.00E-09 | 17         | Intergenic          |
| cg04627240 | 0.144854   | 0.165332 | 2.60E-07 | 19         | Promoter-associated |
| cg04635154 | 0.898187   | 0.914984 | 2.30E-08 | 16         | 3'UTR               |
| cg04652621 | 0.108752   | 0.083154 | 3.89E-07 | 7          | Body                |
| cg04656042 | 0.11527    | 0.086031 | 2.70E-08 | 19         | Intergenic          |
| cg04657325 | 0.357406   | 0.448081 | 2.05E-07 | 4          | Intergenic          |
| cg04665204 | 0.22914    | 0.176408 | 4.09E-07 | 17         | Body                |
| cg04677326 | 0.163633   | 0.145859 | 2.00E-09 | 19         | Body                |
| cg04686114 | 0.10747    | 0.070245 | 7.00E-09 | 12         | Promoter-associated |
| cg04691540 | 0.165643   | 0.193577 | 2.00E-08 | 1          | Body                |
| cg04714638 | 0.110443   | 0.090198 | 2.45E-07 | 19         | Body                |
| cg04721302 | 0.272734   | 0.248389 | 1.00E-09 | 10         | Intergenic          |
| cg04731120 | 0.858173   | 0.875482 | 5.60E-08 | 17         | Body                |
| cg04736562 | 0.419684   | 0.36124  | 0.00E+00 | 10         | 3'UTR               |
| cg04738309 | 0.145946   | 0.163093 | 2.00E-08 | 5          | Body                |
| cg04750593 | 0.070284   | 0.081528 | 3.90E-07 | 4          | Promoter-associated |
| cg04759767 | 0.261897   | 0.184407 | 1.20E-08 | 13         | Intergenic          |
| cg04764907 | 0.545174   | 0.604737 | 4.72E-07 | 10         | 5'UTR               |
| cg04780909 | 0.030026   | 0.024151 | 2.00E-08 | 6          | Body                |
| cg04781587 | 0.916791   | 0.930473 | 5.00E-09 | 16         | Body                |
| cg04791747 | 0.072737   | 0.050133 | 3.00E-09 | 1          | Body                |
| cg04794369 | 0.395006   | 0.356319 | 3.00E-08 | 16         | Intergenic          |
| cg04803843 | 0.073702   | 0.049244 | 3.78E-07 | 15         | Intergenic          |
| cg04810377 | 0.090987   | 0.064282 | 2.48E-07 | 16         | Promoter-associated |
| cg04825775 | 0.100212   | 0.079424 | 9.80E-08 | 5          | Body                |
| cg04856096 | 0.140652   | 0.158969 | 1.00E-07 | 8          | Body                |
| cg04864062 | 0.695933   | 0.634695 | 5.20E-08 | 16         | 3'UTR               |
| cg04869206 | 0.113413   | 0.137039 | 4.30E-08 | 5          | Body                |
| cg04876451 | 0.112656   | 0.131109 | 1.71E-07 | 4          | Promoter-associated |
| cg04886703 | 0.058256   | 0.044879 | 2.58E-07 | 1          | Promoter-associated |
| cg04891165 | 0.842743   | 0.871499 | 0.00E+00 | 1          | Body                |
| cg04900785 | 0.126009   | 0.143568 | 3.10E-08 | 2          | Body                |
| cg04902542 | 0.84447    | 0.870118 | 7.50E-08 | 17         | Body                |
| cg04913443 | 0.089668   | 0.105727 | 3.14E-07 | 14         | 5'UTR               |
| cg04914305 | 0.173904   | 0.203082 | 2.81E-07 | 19         | Promoter-associated |
| cg04920270 | 0.120998   | 0.138156 | 4.00E-09 | 11         | 5'UTR               |
| cg04925824 | 0.244632   | 0.205976 | 5.90E-08 | 13         | Body                |
| cg04930469 | 0.08942    | 0.057352 | 1.00E-09 | 17         | Body                |
| cg04939294 | 0.1237     | 0.140238 | 2.81E-07 | 16         | Body                |
| cg04947578 | 0.101909   | 0.119644 | 7.00E-09 | 19         | Promoter-associated |
| cg04948627 | 0.127033   | 0.140717 | 4.27E-07 | 9          | Promoter-associated |
| cg04952061 | 0.726783   | 0.675387 | 0.00E+00 | 7          | Intergenic          |
| cg04959815 | 0.071535   | 0.056841 | 3.00E-09 | 11         | Body                |
| cg04970839 | 0.760419   | 0.785835 | 3.00E-09 | 7          | Body                |
| cg04971418 | 0.039153   | 0.02658  | 1.00E-09 | 5          | Body                |
| cg04983459 | 0.787759   | 0.817053 | 2.50E-07 | 21         | Intergenic          |

| IlluminaID | Maltreated | Control  | p-value  | Chromosome | CpG site location   |
|------------|------------|----------|----------|------------|---------------------|
| cg04986276 | 0.847476   | 0.867472 | 2.50E-07 | 21         | 5'UTR               |
| cg05000748 | 0.1006     | 0.065597 | 1.37E-07 | 21         | Promoter-associated |
| cg05001908 | 0.225787   | 0.153769 | 4.00E-08 | 7          | Body                |
| cg05002041 | 0.274673   | 0.214575 | 4.00E-09 | 16         | Body                |
| cg05006231 | 0.360524   | 0.274271 | 2.14E-07 | 19         | Intergenic          |
| cg05006954 | 0.733773   | 0.754121 | 1.53E-07 | 10         | Body                |
| cg05011232 | 0.123745   | 0.142569 | 1.48E-07 | 17         | Body                |
| cg05020775 | 0.112563   | 0.083938 | 8.00E-09 | 20         | Body                |
| cg05020822 | 0.189121   | 0.169415 | 2.41E-07 | 8          | Promoter-associated |
| cg05024413 | 0.151709   | 0.174816 | 1.39E-07 | 4          | Promoter-associated |
| cg05036183 | 0.793061   | 0.810598 | 4.72E-07 | 4          | Intergenic          |
| cg05040544 | 0.045455   | 0.037694 | 3.08E-07 | 13         | Promoter-associated |
| cg05041145 | 0.076942   | 0.089796 | 6.30E-08 | 15         | Intergenic          |
| cg05095774 | 0.14649    | 0.115138 | 5.00E-09 | 18         | 5'UTR               |
| cg05100916 | 0.172364   | 0.190933 | 8.60E-08 | 7          | Body                |
| cg05122605 | 0.114623   | 0.134498 | 5.70E-08 | 4          | Body                |
| cg05128992 | 0.041677   | 0.033406 | 2.80E-08 | 18         | Body                |
| cg05135213 | 0.166354   | 0.189342 | 5.60E-08 | 14         | Promoter-associated |
| cg05157171 | 0.043458   | 0.032028 | 6.10E-08 | 6          | Promoter-associated |
| cg05171367 | 0.176013   | 0.196558 | 1.54E-07 | 7          | 5'UTR               |
| cg05209192 | 0.804169   | 0.709498 | 4.85E-07 | 7          | Body                |
| cg05214685 | 0.118461   | 0.094845 | 1.00E-09 | 2          | Intergenic          |
| cg05224705 | 0.060235   | 0.044227 | 1.00E-09 | 19         | Promoter-associated |
| cg05231098 | 0.590809   | 0.504418 | 0.00E+00 | 19         | Body                |
| cg05241025 | 0.113378   | 0.130124 | 3.22E-07 | 22         | Body                |
| cg05257479 | 0.118186   | 0.1344   | 2.36E-07 | 1          | 5'UTR               |
| cg05260236 | 0.879031   | 0.899755 | 8.90E-08 | 16         | Intergenic          |
| cg05262436 | 0.062893   | 0.04897  | 1.77E-07 | 6          | Body                |
| cg05270119 | 0.101046   | 0.113798 | 2.35E-07 | 15         | Promoter-associated |
| cg05281338 | 0.14335    | 0.17255  | 0.00E+00 | 7          | Intergenic          |
| cg05315865 | 0.136945   | 0.154155 | 3.20E-07 | 8          | Promoter-associated |
| cg05320820 | 0.566332   | 0.527407 | 4.74E-07 | 10         | Body                |
| cg05336115 | 0.025412   | 0.017936 | 1.67E-07 | 20         | Body                |
| cg05337998 | 0.745432   | 0.777984 | 3.46E-07 | 17         | Body                |
| cg05349062 | 0.056039   | 0.042557 | 0.00E+00 | 2          | 5'UTR               |
| cg05350358 | 0.104887   | 0.121037 | 4.13E-07 | 10         | Body                |
| cg05360402 | 0.141868   | 0.161646 | 3.31E-07 | 5          | Promoter-associated |
| cg05377998 | 0.7594     | 0.730016 | 9.00E-08 | 19         | Body                |
| cg05406635 | 0.084143   | 0.064081 | 2.09E-07 | 14         | Body                |
| cg05408886 | 0.874722   | 0.834316 | 1.02E-07 | 6          | Intergenic          |
| cg05414442 | 0.456952   | 0.42481  | 1.43E-07 | 2          | 3'UTR               |
| cg05422897 | 0.115879   | 0.131487 | 1.71E-07 | 2          | Promoter-associated |
| cg05449217 | 0.183561   | 0.144535 | 2.15E-07 | 16         | Promoter-associated |
| cg05461259 | 0.252394   | 0.184703 | 4.00E-09 | 1          | Promoter-associated |
| cg05468351 | 0.1177     | 0.138235 | 3.60E-08 | 5          | Body                |
| cg05479582 | 0.197238   | 0.159605 | 0.00E+00 | 10         | Body                |
| cg05484920 | 0.193051   | 0.217565 | 7.60E-08 | 19         | Promoter-associated |
| cg05494465 | 0.113782   | 0.087807 | 7.70E-08 | 13         | Intergenic          |
| cg05523500 | 0.196166   | 0.141683 | 8.70E-08 | 3          | Promoter-associated |
| cg05534678 | 0.124347   | 0.14148  | 4.75E-07 | 16         | 5'UTR               |
| cg05538632 | 0.742536   | 0.776155 | 0.00E+00 | 6          | Body                |
| cg05564608 | 0.842149   | 0.869954 | 2.00E-09 | 5          | Intergenic          |
| cg05575220 | 0.852572   | 0.878706 | 3.61E-07 | 3          | Intergenic          |

| lluminaID  | Maltreated | Control  | p-value  | Chromosome | CpG site location   |
|------------|------------|----------|----------|------------|---------------------|
| cg05577902 | 0.07272    | 0.049854 | 2.12E-07 | 7          | Body                |
| cg05592035 | 0.074915   | 0.048372 | 3.26E-07 | 17         | Promoter-associated |
| cg05592363 | 0.110328   | 0.082417 | 2.35E-07 | 5          | Body                |
| cg05595753 | 0.896315   | 0.915112 | 0.00E+00 | 10         | Body                |
| cg05609414 | 0.717863   | 0.784922 | 1.89E-07 | 7          | Intergenic          |
| cg05616754 | 0.194293   | 0.223506 | 1.72E-07 | 19         | Intergenic          |
| cg05621343 | 0.08628    | 0.062831 | 1.20E-08 | 11         | Promoter-associated |
| cg05622441 | 0.115978   | 0.087831 | 7.80E-08 | 16         | Promoter-associated |
| cg05637536 | 0.044691   | 0.029688 | 8.00E-08 | 1          | 5'UTR               |
| cg05637795 | 0.09426    | 0.107928 | 2.18E-07 | 15         | Promoter-associated |
| cg05640069 | 0.030697   | 0.021553 | 1.78E-07 | 1          | Promoter-associated |
| cg05663122 | 0.048542   | 0.032682 | 5.00E-09 | 19         | Promoter-associated |
| cg05669285 | 0.15806    | 0.178856 | 4.66E-07 | 8          | Body                |
| cg05699123 | 0.708423   | 0.670336 | 3.00E-09 | 6          | Body                |
| cg05702448 | 0.060194   | 0.040477 | 1.00E-09 | 1          | 5'UTR               |
| cg05704155 | 0.05502    | 0.040318 | 7.00E-09 | 1          | Promoter-associated |
| cg05712403 | 0.186967   | 0.248673 | 4.36E-07 | 17         | Body                |
| cg05727959 | 0.118718   | 0.142541 | 3.78E-07 | 12         | Promoter-associated |
| cg05733026 | 0.262721   | 0.245029 | 4.77E-07 | 17         | Body                |
| cg05736236 | 0.111757   | 0.079791 | 1.50E-08 | 2          | Promoter-associated |
| cg05738750 | 0.888552   | 0.905584 | 1.53E-07 | 22         | Intergenic          |
| cg05740793 | 0.206461   | 0.246874 | 2.17E-07 | 11         | Intergenic          |
| cg05752819 | 0.062534   | 0.049325 | 9.40E-08 | 10         | Body                |
| cg05756109 | 0.091661   | 0.067728 | 9.70E-08 | 10         | Body                |
| cg05782078 | 0.479732   | 0.414516 | 8.70E-08 | 7          | Body                |
| cg05783854 | 0.14126    | 0.162689 | 1.10E-08 | 5          | Body                |
| cg05786840 | 0.170882   | 0.136006 | 2.50E-08 | 1          | Body                |
| cg05787931 | 0.093109   | 0.072346 | 6.80E-08 | 3          | Body                |
| cg05796321 | 0.137496   | 0.107128 | 2.70E-08 | 1          | Body                |
| cg05808815 | 0.375227   | 0.33019  | 0.00E+00 | 1          | Promoter-associated |
| cg05812269 | 0.154513   | 0.127717 | 1.00E-09 | 18         | Promoter-associated |
| cg05831907 | 0.638847   | 0.556334 | 1.50E-07 | 12         | Intergenic          |
| cg05843966 | 0.798189   | 0.836152 | 2.26E-07 | 7          | Body                |
| cg05849499 | 0.817219   | 0.8498   | 1.00E-09 | 16         | Body                |
| cg05849857 | 0.056046   | 0.040541 | 4.11E-07 | 13         | Body                |
| cg05861071 | 0.131877   | 0.150573 | 1.35E-07 | 4          | Promoter-associated |
| cg05874478 | 0.632886   | 0.571035 | 7.00E-09 | 14         | Promoter-associated |
| cg05878337 | 0.095715   | 0.065619 | 2.19E-07 | 5          | Body                |
| cg05900347 | 0.14996    | 0.168677 | 2.00E-07 | 2          | Intergenic          |
| cg05913197 | 0.130649   | 0.104656 | 2.20E-08 | 6          | Promoter-associated |
| cg05915794 | 0.647494   | 0.490811 | 1.30E-08 | 17         | 5'UTR               |
| cg05920090 | 0.100674   | 0.114011 | 1.50E-07 | 6          | Promoter-associated |
| cg05923184 | 0.136639   | 0.161828 | 2.70E-08 | 19         | Body                |
| cg05924191 | 0.797941   | 0.842196 | 2.00E-09 | 15         | 5'UTR               |
| cg05930162 | 0.185626   | 0.208019 | 1.93E-07 | 1          | Promoter-associated |
| cg05931265 | 0.112007   | 0.126905 | 4.75E-07 | 11         | Promoter-associated |
| cg05931684 | 0.157697   | 0.126472 | 1.60E-08 | 6          | Promoter-associated |
| cg05940231 | 0.196408   | 0.152424 | 4.40E-08 | 1          | Body                |
| cg05952120 | 0.063312   | 0.044676 | 1.00E-09 | 17         | Body                |
| cg05954989 | 0.030319   | 0.024414 | 3.60E-08 | 10         | Body                |
| cg05955675 | 0.648312   | 0.53483  | 2.43E-07 | 16         | Intergenic          |
| cg05959525 | 0.135637   | 0.153144 | 1.91E-07 | 11         | Promoter-associated |
| cg05978071 | 0.825625   | 0.72798  | 2.11E-07 | 2          | Body                |

| IlluminaID | Maltreated | Control  | p-value  | Chromosome | CpG site location   |
|------------|------------|----------|----------|------------|---------------------|
| cg05990650 | 0.555947   | 0.531953 | 6.80E-08 | 22         | Intergenic          |
| cg05992412 | 0.808075   | 0.826404 | 2.39E-07 | 2          | Intergenic          |
| cg06006623 | 0.912843   | 0.924593 | 9.10E-08 | 6          | Body                |
| cg06007320 | 0.073219   | 0.055809 | 1.10E-08 | 2          | Promoter-associated |
| cg06025835 | 0.373769   | 0.441991 | 3.49E-07 | 5          | Body                |
| cg06045225 | 0.120171   | 0.139537 | 4.70E-08 | 5          | Body                |
| cg06056004 | 0.106755   | 0.119321 | 3.92E-07 | 5          | Promoter-associated |
| cg06058923 | 0.120917   | 0.090165 | 1.95E-07 | 6          | Intergenic          |
| cg06059332 | 0.791992   | 0.725821 | 8.00E-09 | 7          | Body                |
| cg06073094 | 0.099198   | 0.112641 | 2.24E-07 | 11         | Intergenic          |
| cg06074314 | 0.155785   | 0.177307 | 6.80E-08 | 2          | 5'UTR               |
| cg06082228 | 0.656299   | 0.602482 | 2.00E-09 | 3          | Body                |
| cg06110578 | 0.147368   | 0.171016 | 3.30E-08 | 6          | Promoter-associated |
| cg06112779 | 0.087393   | 0.064497 | 2.60E-08 | 12         | Body                |
| cg06128043 | 0.586078   | 0.551161 | 4.58E-07 | 16         | Intergenic          |
| cg06137672 | 0.225845   | 0.180468 | 4.20E-08 | X          | Body                |
| cg06138195 | 0.815024   | 0.8491   | 0.00E+00 | 17         | Intergenic          |
| cg06138422 | 0.078708   | 0.054211 | 5.70E-08 | 12         | Body                |
| cg06157335 | 0.13822    | 0.16473  | 0.00E+00 | 1          | Promoter-associated |
| cg06160841 | 0.89285    | 0.90832  | 3.21E-07 | 2          | 5'UTR               |
| cg06169648 | 0.184835   | 0.209586 | 5.20E-08 | 16         | Body                |
| cg06180363 | 0.100361   | 0.111569 | 3.05E-07 | 19         | Promoter-associated |
| cg06200777 | 0.119015   | 0.136454 | 2.82E-07 | 6          | 5'UTR               |
| cg06220161 | 0.101027   | 0.11499  | 1.98E-07 | 7          | Promoter-associated |
| cg06226283 | 0.038507   | 0.032714 | 4.31E-07 | 7          | Body                |
| cg06245037 | 0.055436   | 0.042034 | 8.00E-09 | 11         | Body                |
| cg06290265 | 0.738642   | 0.787008 | 4.90E-08 | 7          | Intergenic          |
| cg06310844 | 0.425485   | 0.359687 | 1.10E-08 | 19         | Promoter-associated |
| cg06379478 | 0.732859   | 0.603068 | 3.35E-07 | 16         | Body                |
| cg06380355 | 0.409115   | 0.350964 | 4.00E-09 | X          | Body                |
| cg06385874 | 0.172479   | 0.139763 | 2.32E-07 | 11         | Intergenic          |
| cg06391107 | 0.116209   | 0.135527 | 1.50E-08 | 19         | Promoter-associated |
| cg06415087 | 0.170746   | 0.113307 | 3.05E-07 | 7          | Body                |
| cg06419771 | 0.095423   | 0.109135 | 2.00E-08 | 15         | Promoter-associated |
| cg06420058 | 0.642941   | 0.60082  | 8.60E-08 | 17         | Body                |
| cg06421526 | 0.271514   | 0.343823 | 4.25E-07 | 17         | Intergenic          |
| cg06427502 | 0.476313   | 0.41746  | 3.87E-07 | 11         | 5'UTR               |
| cg06435604 | 0.884769   | 0.90341  | 3.89E-07 | 17         | Intergenic          |
| cg06438404 | 0.145968   | 0.172416 | 1.68E-07 | 16         | Body                |
| cg06443863 | 0.027661   | 0.020427 | 0.00E+00 | 8          | Promoter-associated |
| cg06456512 | 0.177433   | 0.199091 | 2.80E-07 | 15         | Promoter-associated |
| cg06468476 | 0.087281   | 0.060392 | 1.00E-09 | 21         | Promoter-associated |
| cg06473181 | 0.099428   | 0.078593 | 0.00E+00 | 2          | Body                |
| cg06476093 | 0.03614    | 0.028375 | 1.20E-08 | 2          | 5'UTR               |
| cg06492821 | 0.174799   | 0.12766  | 1.00E-09 | 16         | Body                |
| cg06496078 | 0.106228   | 0.120055 | 1.80E-08 | 12         | 5'UTR               |
| cg06496222 | 0.11912    | 0.138702 | 3.09E-07 | 16         | 3'UTR               |
| cg06500355 | 0.053724   | 0.037131 | 0.00E+00 | 6          | Promoter-associated |
| cg06524479 | 0.080916   | 0.063171 | 6.20E-08 | 16         | Body                |
| cg06534285 | 0.221232   | 0.253313 | 6.50E-08 | 7          | Promoter-associated |
| cg06542686 | 0.112155   | 0.12649  | 3.58E-07 | 22         | Promoter-associated |
| cg06542865 | 0.227932   | 0.193667 | 2.13E-07 | 20         | Body                |
| cg06550102 | 0.109795   | 0.128825 | 4.37E-07 | 3          | Promoter-associated |

| lluminaID  | Maltreated | Control  | p-value  | Chromosome | CpG site location   |
|------------|------------|----------|----------|------------|---------------------|
| cg06575065 | 0.308037   | 0.231251 | 6.10E-08 | 16         | Body                |
| cg06577251 | 0.091064   | 0.107259 | 6.90E-08 | 6          | Body                |
| cg06585708 | 0.215311   | 0.148425 | 4.55E-07 | 5          | Intergenic          |
| cg06598631 | 0.143436   | 0.158685 | 9.10E-08 | 6          | Body                |
| cg06604058 | 0.098706   | 0.06759  | 1.25E-07 | 11         | Body                |
| cg06606548 | 0.823642   | 0.85371  | 0.00E+00 | 3          | 5'UTR               |
| cg06621373 | 0.114743   | 0.127479 | 1.03E-07 | 19         | Body                |
| cg06626599 | 0.141047   | 0.094664 | 9.00E-09 | 1          | Promoter-associated |
| cg06631310 | 0.193473   | 0.154342 | 4.12E-07 | 12         | Body                |
| cg06634950 | 0.155605   | 0.183081 | 9.30E-08 | 3          | Promoter-associated |
| cg06636685 | 0.163245   | 0.188735 | 1.32E-07 | 13         | Body                |
| cg06638874 | 0.860249   | 0.882104 | 6.40E-08 | 6          | Intergenic          |
| cg06639788 | 0.056783   | 0.047122 | 1.40E-08 | 1          | Body                |
| cg06644634 | 0.879835   | 0.902725 | 1.96E-07 | 19         | Body                |
| cg06652315 | 0.185071   | 0.209439 | 1.55E-07 | 3          | Intergenic          |
| cg06652850 | 0.075619   | 0.058551 | 1.61E-07 | 7          | Body                |
| cg06654498 | 0.712601   | 0.737637 | 9.70E-08 | 16         | Body                |
| cg06660652 | 0.800731   | 0.820887 | 0.00E+00 | 16         | Body                |
| cg06665941 | 0.077475   | 0.094786 | 9.40E-08 | 21         | Body                |
| cg06677120 | 0.597666   | 0.551063 | 1.90E-08 | 13         | Intergenic          |
| cg06678902 | 0.81161    | 0.844244 | 1.29E-07 | 5          | Body                |
| cg06679003 | 0.063678   | 0.053037 | 3.50E-08 | 2          | Promoter-associated |
| cg06686029 | 0.058386   | 0.048594 | 1.93E-07 | 20         | Promoter-associated |
| cg06690633 | 0.162091   | 0.185232 | 1.52E-07 | 14         | Body                |
| cg06700871 | 0.237213   | 0.174566 | 0.00E+00 | 2          | Promoter-associated |
| cg06703332 | 0.117303   | 0.137318 | 2.64E-07 | 1          | Intergenic          |
| cg06710900 | 0.136888   | 0.162289 | 1.30E-08 | 3          | Body                |
| cg06712763 | 0.312756   | 0.276045 | 5.40E-08 | 16         | Body                |
| cg06717492 | 0.107086   | 0.086039 | 4.03E-07 | 7          | Promoter-associated |
| cg06723301 | 0.187279   | 0.149317 | 2.00E-09 | 22         | Promoter-associated |
| cg06728098 | 0.301894   | 0.396652 | 1.60E-08 | 8          | Promoter-associated |
| cg06728674 | 0.07286    | 0.085619 | 4.02E-07 | 13         | Body                |
| cg06731730 | 0.260365   | 0.189657 | 1.71E-07 | 16         | Promoter-associated |
| cg06732976 | 0.902012   | 0.917093 | 1.60E-08 | 4          | Intergenic          |
| cg06736685 | 0.122398   | 0.144817 | 4.00E-09 | 16         | Intergenic          |
| cg06745235 | 0.105038   | 0.124691 | 2.26E-07 | 1          | Promoter-associated |
| cg06745957 | 0.057051   | 0.041444 | 8.90E-08 | 11         | Promoter-associated |
| cg06748231 | 0.050383   | 0.042111 | 1.00E-09 | 5          | Body                |
| cg06753227 | 0.508555   | 0.473422 | 4.20E-08 | 18         | Promoter-associated |
| cg06754965 | 0.931072   | 0.9411   | 4.11E-07 | 16         | Body                |
| cg06766659 | 0.15791    | 0.128667 | 2.70E-08 | 10         | Body                |
| cg06777853 | 0.13963    | 0.157372 | 1.15E-07 | 14         | Promoter-associated |
| cg06789048 | 0.679209   | 0.531855 | 1.27E-07 | 4          | Body                |
| cg06790019 | 0.148716   | 0.114742 | 2.42E-07 | 1          | Promoter-associated |
| cg06793581 | 0.133358   | 0.14942  | 4.73E-07 | 16         | Promoter-associated |
| cg06794263 | 0.158889   | 0.184856 | 1.50E-08 | 15         | Body                |
| cg06796825 | 0.108758   | 0.081753 | 3.43E-07 | 17         | Promoter-associated |
| cg06800444 | 0.12902    | 0.152715 | 4.00E-07 | 8          | Body                |
| cg06807989 | 0.137247   | 0.154923 | 2.28E-07 | 3          | Promoter-associated |
| cg06815976 | 0.340339   | 0.283204 | 4.17E-07 | 6          | Body                |
| cg06826278 | 0.175739   | 0.13956  | 1.90E-08 | 15         | Body                |
| cg06830415 | 0.556268   | 0.527252 | 2.64E-07 | 7          | Body                |
| cg06836181 | 0.169319   | 0.197664 | 8.00E-09 | 2          | Intergenic          |



| IlluminaID | Maltreated | Control  | p-value  | Chromosome | CpG site location   |
|------------|------------|----------|----------|------------|---------------------|
| cg06848185 | 0.025623   | 0.019574 | 2.06E-07 | 17         | 5'UTR               |
| cg06852575 | 0.254665   | 0.184287 | 1.30E-08 | 19         | Promoter-associated |
| cg06858186 | 0.248326   | 0.324928 | 3.75E-07 | 12         | Intergenic          |
| cg06864005 | 0.731549   | 0.699348 | 8.90E-08 | 7          | Body                |
| cg06866657 | 0.180808   | 0.202118 | 2.50E-08 | 9          | Body                |
| cg06896619 | 0.037411   | 0.027717 | 1.46E-07 | 17         | Body                |
| cg06901526 | 0.093509   | 0.109143 | 1.08E-07 | 2          | Promoter-associated |
| cg06903151 | 0.936786   | 0.918457 | 7.60E-08 | 11         | Body                |
| cg06911519 | 0.137673   | 0.154828 | 4.30E-08 | 2          | Promoter-associated |
| cg06919790 | 0.116824   | 0.086602 | 3.00E-08 | 6          | Body                |
| cg06927324 | 0.15371    | 0.177782 | 2.70E-07 | 14         | Promoter-associated |
| cg06928838 | 0.063621   | 0.047153 | 4.60E-08 | 11         | Promoter-associated |
| cg06957130 | 0.095442   | 0.07624  | 3.93E-07 | 22         | Body                |
| cg06966660 | 0.276314   | 0.186946 | 3.40E-07 | 10         | Body                |
| cg06973234 | 0.106483   | 0.124309 | 5.50E-08 | 18         | Body                |
| cg06977935 | 0.464973   | 0.358635 | 3.75E-07 | 16         | Intergenic          |
| cg06979550 | 0.113295   | 0.132115 | 1.33E-07 | 5          | Promoter-associated |
| cg06983551 | 0.240894   | 0.174639 | 1.37E-07 | 2          | Promoter-associated |
| cg07000551 | 0.088788   | 0.104939 | 3.75E-07 | 15         | Promoter-associated |
| cg07010359 | 0.03687    | 0.026942 | 1.91E-07 | 1          | Promoter-associated |
| cg07021777 | 0.080807   | 0.062127 | 1.35E-07 | 4          | Promoter-associated |
| cg07023327 | 0.054326   | 0.03768  | 8.60E-08 | 7          | Promoter-associated |
| cg07051329 | 0.221358   | 0.176484 | 1.18E-07 | X          | Body                |
| cg07061579 | 0.198908   | 0.171424 | 4.80E-08 | 19         | Promoter-associated |
| cg07063914 | 0.844056   | 0.793609 | 4.20E-08 | 2          | Intergenic          |
| cg07066067 | 0.903432   | 0.922113 | 1.20E-08 | 16         | Body                |
| cg07087156 | 0.098118   | 0.074623 | 3.04E-07 | 2          | Intergenic          |
| cg07089783 | 0.114792   | 0.085031 | 1.18E-07 | 10         | Body                |
| cg07093111 | 0.098776   | 0.113372 | 2.43E-07 | 17         | Body                |
| cg07094915 | 0.075077   | 0.050968 | 2.90E-08 | 7          | Intergenic          |
| cg07101354 | 0.494262   | 0.552259 | 4.50E-08 | 1          | Intergenic          |
| cg07104116 | 0.841852   | 0.871819 | 1.78E-07 | 16         | Body                |
| cg07113322 | 0.153709   | 0.171101 | 1.11E-07 | 16         | Promoter-associated |
| cg07122172 | 0.108304   | 0.070102 | 5.30E-08 | 12         | 5'UTR               |
| cg07131604 | 0.775935   | 0.677048 | 3.48E-07 | 1          | Body                |
| cg07135797 | 0.856323   | 0.878408 | 3.43E-07 | 6          | Body                |
| cg07135942 | 0.267369   | 0.196096 | 1.86E-07 | 16         | Intergenic          |
| cg07146119 | 0.020589   | 0.016606 | 1.75E-07 | 8          | Body                |
| cg07156929 | 0.168133   | 0.141421 | 1.00E-09 | 6          | Promoter-associated |
| cg07160044 | 0.080743   | 0.054506 | 5.00E-09 | 13         | Body                |
| cg07167946 | 0.204466   | 0.136215 | 6.90E-08 | 5          | Body                |
| cg07181902 | 0.109068   | 0.093727 | 1.48E-07 | 2          | Body                |
| cg07197864 | 0.122991   | 0.137934 | 2.62E-07 | 1          | Promoter-associated |
| cg07207484 | 0.744042   | 0.777869 | 3.56E-07 | 7          | Body                |
| cg07213548 | 0.817762   | 0.861962 | 4.89E-07 | 1          | Intergenic          |
| cg07220085 | 0.10895    | 0.127398 | 5.40E-08 | 15         | Promoter-associated |
| cg07226679 | 0.061141   | 0.07266  | 1.75E-07 | 2          | Promoter-associated |
| cg07236039 | 0.849879   | 0.872831 | 1.30E-08 | 5          | Body                |
| cg07255356 | 0.092332   | 0.073794 | 8.80E-08 | 5          | Promoter-associated |
| cg07262328 | 0.101838   | 0.116551 | 1.92E-07 | 11         | Body                |
| cg07266126 | 0.054304   | 0.034813 | 8.00E-09 | 6          | Intergenic          |
| cg07269724 | 0.117199   | 0.132913 | 2.62E-07 | 19         | Intergenic          |
| cg07274204 | 0.877659   | 0.892354 | 1.75E-07 | 16         | Body                |

| lluminaID  | Maltreated | Control  | p-value  | Chromosome | CpG site location   |
|------------|------------|----------|----------|------------|---------------------|
| cg07277818 | 0.156514   | 0.126551 | 6.20E-08 | 5          | Body                |
| cg07297567 | 0.92228    | 0.932743 | 9.50E-08 | 2          | Body                |
| cg07306881 | 0.113613   | 0.129103 | 9.00E-08 | 18         | Body                |
| cg07318453 | 0.101013   | 0.07445  | 1.00E-09 | 4          | Body                |
| cg07324633 | 0.689793   | 0.737394 | 9.00E-09 | 5          | Intergenic          |
| cg07333905 | 0.091198   | 0.06245  | 3.00E-09 | 6          | Promoter-associated |
| cg07339229 | 0.811899   | 0.853012 | 2.00E-09 | 7          | Body                |
| cg07344583 | 0.097972   | 0.080548 | 1.20E-08 | 15         | 5'UTR               |
| cg07352798 | 0.163737   | 0.14037  | 2.04E-07 | 5          | Promoter-associated |
| cg07354253 | 0.109187   | 0.088189 | 5.00E-09 | 5          | Promoter-associated |
| cg07355551 | 0.186848   | 0.209364 | 1.10E-08 | 20         | Promoter-associated |
| cg07355693 | 0.08119    | 0.061432 | 3.90E-07 | 12         | Intergenic          |
| cg07368877 | 0.656058   | 0.691382 | 2.58E-07 | 1          | Intergenic          |
| cg07370646 | 0.058016   | 0.046631 | 3.60E-07 | 22         | Intergenic          |
| cg07375367 | 0.23463    | 0.205492 | 7.90E-08 | 13         | Body                |
| cg07387199 | 0.116186   | 0.14346  | 2.40E-08 | 17         | Body                |
| cg07393674 | 0.915442   | 0.894008 | 1.92E-07 | 16         | Intergenic          |
| cg07399355 | 0.104252   | 0.124224 | 8.30E-08 | 1          | Body                |
| cg07417284 | 0.111798   | 0.09096  | 4.57E-07 | 17         | Body                |
| cg07423602 | 0.470528   | 0.441203 | 1.26E-07 | 1          | Intergenic          |
| cg07436753 | 0.065476   | 0.049754 | 2.60E-07 | 16         | Promoter-associated |
| cg07439409 | 0.185187   | 0.213839 | 1.38E-07 | 6          | Promoter-associated |
| cg07458698 | 0.046145   | 0.036556 | 4.00E-09 | 2          | Promoter-associated |
| cg07458712 | 0.256967   | 0.223543 | 4.35E-07 | 4          | Intergenic          |
| cg07461160 | 0.114885   | 0.085109 | 3.02E-07 | 19         | Promoter-associated |
| cg07466433 | 0.096632   | 0.066632 | 7.70E-08 | 2          | Promoter-associated |
| cg07472772 | 0.06035    | 0.045859 | 2.25E-07 | 20         | Body                |
| cg07483523 | 0.711056   | 0.759719 | 7.00E-09 | 19         | Body                |
| cg07489134 | 0.092369   | 0.107185 | 2.66E-07 | 10         | Body                |
| cg07504545 | 0.924841   | 0.936209 | 2.80E-08 | 1          | 3'UTR               |
| cg07513383 | 0.080947   | 0.065374 | 3.00E-09 | 19         | Promoter-associated |
| cg07519721 | 0.18526    | 0.261051 | 1.01E-07 | 15         | 5'UTR               |
| cg07519873 | 0.034534   | 0.027682 | 4.26E-07 | 19         | Body                |
| cg07520141 | 0.112643   | 0.133272 | 8.00E-09 | 5          | Promoter-associated |
| cg07535605 | 0.115586   | 0.137181 | 7.90E-08 | 18         | Promoter-associated |
| cg07536847 | 0.06691    | 0.044197 | 2.30E-08 | 1          | Body                |
| cg07538946 | 0.027278   | 0.022479 | 4.10E-08 | 5          | Promoter-associated |
| cg07558287 | 0.053884   | 0.043479 | 2.84E-07 | 3          | Promoter-associated |
| cg07562458 | 0.089106   | 0.071276 | 1.40E-08 | 1          | Promoter-associated |
| cg07562483 | 0.095099   | 0.059547 | 1.81E-07 | 10         | Promoter-associated |
| cg07568751 | 0.1083     | 0.12597  | 8.90E-08 | 12         | Promoter-associated |
| cg07570055 | 0.159764   | 0.113858 | 1.90E-08 | 2          | Intergenic          |
| cg07571970 | 0.062791   | 0.046476 | 1.80E-08 | 14         | Body                |
| cg07580707 | 0.104571   | 0.068008 | 1.28E-07 | 3          | Body                |
| cg07589166 | 0.041847   | 0.029442 | 1.36E-07 | 19         | Body                |
| cg07598522 | 0.138171   | 0.108356 | 2.20E-08 | 19         | Body                |
| cg07599579 | 0.804276   | 0.82511  | 3.92E-07 | 11         | 5'UTR               |
| cg07630649 | 0.023598   | 0.017779 | 1.20E-08 | 16         | Promoter-associated |
| cg07645461 | 0.12767    | 0.145253 | 6.60E-08 | 13         | Promoter-associated |
| cg07665115 | 0.891202   | 0.908145 | 3.37E-07 | 8          | Body                |
| cg07697662 | 0.042636   | 0.028923 | 3.60E-08 | 16         | Promoter-associated |
| cg07702548 | 0.06703    | 0.04939  | 1.60E-08 | 16         | Promoter-associated |
| cg07704934 | 0.10327    | 0.083031 | 6.00E-09 | 11         | Body                |

| IlluminaID | Maltreated | Control  | p-value  | Chromosome | CpG site location   |
|------------|------------|----------|----------|------------|---------------------|
| cg07713849 | 0.91842    | 0.929587 | 4.42E-07 | 6          | Body                |
| cg07723114 | 0.069363   | 0.053579 | 2.50E-07 | 6          | Promoter-associated |
| cg07737810 | 0.792171   | 0.831954 | 4.30E-08 | 18         | Intergenic          |
| cg07742134 | 0.091372   | 0.102734 | 4.75E-07 | 5          | Body                |
| cg07750813 | 0.752761   | 0.789112 | 9.80E-08 | 6          | Body                |
| cg07753245 | 0.559808   | 0.518929 | 7.00E-09 | 16         | Promoter-associated |
| cg07785225 | 0.735293   | 0.68997  | 1.40E-07 | 12         | Body                |
| cg07793537 | 0.777332   | 0.814094 | 1.36E-07 | 2          | Body                |
| cg07817097 | 0.1015     | 0.067156 | 6.60E-08 | 1          | Promoter-associated |
| cg07818830 | 0.108424   | 0.08914  | 3.67E-07 | 12         | 5'UTR               |
| cg07865517 | 0.121276   | 0.166363 | 1.22E-07 | 14         | Body                |
| cg07882184 | 0.548847   | 0.624796 | 9.00E-08 | 12         | Body                |
| cg07882382 | 0.051499   | 0.038008 | 1.04E-07 | 3          | Body                |
| cg07892879 | 0.926643   | 0.936317 | 8.70E-08 | 17         | 3'UTR               |
| cg07913310 | 0.146026   | 0.163897 | 3.80E-07 | 19         | Promoter-associated |
| cg07923305 | 0.101771   | 0.114463 | 6.00E-09 | 1          | Body                |
| cg07923459 | 0.131926   | 0.153469 | 2.00E-09 | 4          | Body                |
| cg07926482 | 0.064446   | 0.049434 | 2.07E-07 | 16         | Promoter-associated |
| cg07927839 | 0.182682   | 0.206715 | 3.90E-08 | 12         | Body                |
| cg07940793 | 0.08957    | 0.067533 | 8.40E-08 | 17         | Promoter-associated |
| cg07956936 | 0.152701   | 0.168453 | 1.98E-07 | 16         | 5'UTR               |
| cg07958926 | 0.175643   | 0.196685 | 1.86E-07 | 1          | Intergenic          |
| cg07963361 | 0.057757   | 0.045102 | 9.00E-08 | 7          | Body                |
| cg07967679 | 0.177324   | 0.143775 | 3.48E-07 | 12         | Body                |
| cg07971827 | 0.709258   | 0.750503 | 0.00E+00 | 10         | Body                |
| cg07972541 | 0.076192   | 0.05534  | 1.07E-07 | 16         | Promoter-associated |
| cg07982935 | 0.11486    | 0.07251  | 0.00E+00 | 16         | Body                |
| cg08005943 | 0.111507   | 0.128543 | 2.49E-07 | 1          | Body                |
| cg08009993 | 0.065192   | 0.077703 | 2.60E-08 | 19         | Promoter-associated |
| cg08012278 | 0.136099   | 0.100651 | 3.30E-08 | 2          | Intergenic          |
| cg08023476 | 0.583037   | 0.542802 | 2.60E-08 | 7          | 5'UTR               |
| cg08035872 | 0.68911    | 0.745945 | 1.00E-09 | 3          | 5'UTR               |
| cg08039701 | 0.372036   | 0.309989 | 2.31E-07 | 5          | 5'UTR               |
| cg08040170 | 0.077094   | 0.0595   | 8.70E-08 | 16         | Promoter-associated |
| cg08050352 | 0.126574   | 0.09569  | 3.90E-08 | 16         | Promoter-associated |
| cg08071595 | 0.9169     | 0.877992 | 2.58E-07 | 22         | Intergenic          |
| cg08072980 | 0.717345   | 0.788246 | 2.63E-07 | 7          | Body                |
| cg08073527 | 0.902671   | 0.917772 | 4.90E-08 | 21         | Body                |
| cg08081845 | 0.254329   | 0.208146 | 2.44E-07 | 14         | Body                |
| cg08097417 | 0.178382   | 0.20073  | 3.89E-07 | 7          | Body                |
| cg08117436 | 0.719501   | 0.769462 | 1.00E-09 | 1          | Intergenic          |
| cg08125682 | 0.147339   | 0.114721 | 5.20E-08 | 16         | Promoter-associated |
| cg08158076 | 0.12415    | 0.139598 | 2.50E-08 | 1          | Promoter-associated |
| cg08158524 | 0.074283   | 0.053094 | 2.80E-08 | 12         | Promoter-associated |
| cg08169394 | 0.073226   | 0.061309 | 1.43E-07 | 17         | Body                |
| cg08180624 | 0.656923   | 0.71054  | 2.00E-09 | 10         | Intergenic          |
| cg08185661 | 0.184887   | 0.211665 | 2.81E-07 | 11         | Body                |
| cg08192350 | 0.072268   | 0.048806 | 1.07E-07 | 12         | Body                |
| cg08209163 | 0.079661   | 0.051743 | 9.00E-08 | 13         | 5'UTR               |
| cg08272731 | 0.029558   | 0.022032 | 3.29E-07 | 1          | Body                |
| cg08274589 | 0.062191   | 0.050703 | 4.70E-08 | 15         | Promoter-associated |
| cg08285429 | 0.712766   | 0.748594 | 5.60E-08 | 4          | Intergenic          |
| cg08324115 | 0.240769   | 0.184464 | 4.24E-07 | 16         | Intergenic          |

| IlluminaID | Maltreated | Control  | p-value  | Chromosome | CpG site location   |
|------------|------------|----------|----------|------------|---------------------|
| cg08326301 | 0.020198   | 0.016231 | 2.57E-07 | 2          | Promoter-associated |
| cg08334153 | 0.130734   | 0.148959 | 7.20E-08 | 8          | Promoter-associated |
| cg08336300 | 0.235123   | 0.278094 | 4.05E-07 | 6          | Promoter-associated |
| cg08348387 | 0.097988   | 0.063539 | 1.00E-09 | 2          | Promoter-associated |
| cg08351017 | 0.797166   | 0.820244 | 2.46E-07 | 11         | 3'UTR               |
| cg08354699 | 0.129222   | 0.10401  | 3.00E-09 | 15         | Promoter-associated |
| cg08370718 | 0.073011   | 0.054007 | 2.52E-07 | 15         | 5'UTR               |
| cg08387285 | 0.09159    | 0.056758 | 5.00E-09 | 11         | Body                |
| cg08390021 | 0.097915   | 0.114609 | 3.50E-08 | 18         | Promoter-associated |
| cg08399230 | 0.124494   | 0.103416 | 4.83E-07 | 16         | Promoter-associated |
| cg08411512 | 0.314401   | 0.268096 | 9.60E-08 | 20         | Intergenic          |
| cg08427928 | 0.035498   | 0.030033 | 3.09E-07 | 7          | Body                |
| cg08440521 | 0.172805   | 0.229985 | 3.93E-07 | 4          | Body                |
| cg08444731 | 0.06713    | 0.053907 | 3.99E-07 | 4          | Body                |
| cg08450752 | 0.115938   | 0.087027 | 2.13E-07 | 15         | Intergenic          |
| cg08464824 | 0.133356   | 0.156236 | 5.20E-08 | 19         | Promoter-associated |
| cg08472559 | 0.492758   | 0.406476 | 0.00E+00 | 10         | Body                |
| cg08492707 | 0.026527   | 0.019384 | 2.43E-07 | 21         | Promoter-associated |
| cg08510077 | 0.158146   | 0.123404 | 4.00E-09 | 3          | Promoter-associated |
| cg08524698 | 0.037676   | 0.02687  | 6.00E-09 | 22         | Promoter-associated |
| cg08532834 | 0.127365   | 0.105648 | 3.80E-07 | 7          | Body                |
| cg08555460 | 0.176199   | 0.201874 | 1.67E-07 | 14         | Intergenic          |
| cg08555653 | 0.159278   | 0.115756 | 6.80E-08 | 3          | Intergenic          |
| cg08577341 | 0.585872   | 0.647857 | 5.00E-09 | 5          | Body                |
| cg08577517 | 0.375926   | 0.31877  | 1.20E-08 | 6          | Promoter-associated |
| cg08577743 | 0.15666    | 0.178892 | 1.92E-07 | 9          | Promoter-associated |
| cg08599294 | 0.193376   | 0.134955 | 1.90E-08 | 13         | Promoter-associated |
| cg08610201 | 0.042107   | 0.031611 | 1.34E-07 | 19         | Promoter-associated |
| cg08612601 | 0.148016   | 0.170229 | 9.70E-08 | 6          | Promoter-associated |
| cg08649216 | 0.536023   | 0.470789 | 1.70E-08 | 7          | Intergenic          |
| cg08653403 | 0.191243   | 0.240443 | 4.07E-07 | 1          | Body                |
| cg08659621 | 0.099486   | 0.114705 | 5.00E-09 | 20         | Promoter-associated |
| cg08663007 | 0.778067   | 0.819546 | 8.10E-08 | 3          | Body                |
| cg08666333 | 0.741968   | 0.773764 | 1.00E-09 | 4          | Intergenic          |
| cg08667777 | 0.128974   | 0.149623 | 7.00E-08 | 3          | Promoter-associated |
| cg08701515 | 0.037804   | 0.029871 | 1.43E-07 | 16         | Body                |
| cg08751265 | 0.064687   | 0.051738 | 9.50E-08 | 13         | Intergenic          |
| cg08755283 | 0.336395   | 0.260337 | 2.00E-09 | 5          | Promoter-associated |
| cg08762306 | 0.283032   | 0.205331 | 1.60E-08 | 16         | Promoter-associated |
| cg08763126 | 0.118473   | 0.137906 | 1.68E-07 | 6          | 5'UTR               |
| cg08763433 | 0.100883   | 0.117273 | 6.00E-09 | 1          | Promoter-associated |
| cg08787268 | 0.060333   | 0.039496 | 1.00E-09 | 17         | Intergenic          |
| cg08817168 | 0.519746   | 0.490392 | 2.20E-08 | 3          | Intergenic          |
| cg08830355 | 0.107051   | 0.124656 | 1.20E-07 | 16         | Body                |
| cg08857201 | 0.198009   | 0.238708 | 2.72E-07 | 15         | Body                |
| cg08866402 | 0.049636   | 0.040338 | 3.43E-07 | 21         | Body                |
| cg08872741 | 0.114678   | 0.135965 | 2.57E-07 | 12         | Intergenic          |
| cg08876479 | 0.079907   | 0.069397 | 2.57E-07 | 10         | Promoter-associated |
| cg08876591 | 0.158929   | 0.18142  | 1.00E-09 | 7          | Body                |
| cg08882650 | 0.232988   | 0.156644 | 2.00E-09 | 1          | Body                |
| cg08883955 | 0.139221   | 0.159265 | 2.20E-08 | 16         | Body                |
| cg08885708 | 0.592646   | 0.507893 | 5.00E-09 | 15         | Intergenic          |
| cg08891424 | 0.151684   | 0.16792  | 1.20E-07 | 2          | 5'UTR               |

| lluminaID  | Maltreated | Control  | p-value  | Chromosome | CpG site location   |
|------------|------------|----------|----------|------------|---------------------|
| cg08899291 | 0.188839   | 0.150218 | 2.00E-09 | 16         | Promoter-associated |
| cg08900656 | 0.852116   | 0.803957 | 1.38E-07 | 4          | Intergenic          |
| cg08900983 | 0.891297   | 0.905947 | 4.60E-08 | 6          | Intergenic          |
| cg08905166 | 0.067447   | 0.057791 | 1.12E-07 | 4          | Promoter-associated |
| cg08923271 | 0.235967   | 0.182408 | 0.00E+00 | 1          | Intergenic          |
| cg08933160 | 0.81039    | 0.851678 | 0.00E+00 | 12         | 3'UTR               |
| cg08935125 | 0.721888   | 0.762525 | 3.99E-07 | 16         | 5'UTR               |
| cg08935299 | 0.088936   | 0.068856 | 0.00E+00 | 12         | Body                |
| cg08935602 | 0.07484    | 0.089652 | 0.00E+00 | 16         | Promoter-associated |
| cg08944318 | 0.156474   | 0.121276 | 1.38E-07 | 10         | 5'UTR               |
| cg08946014 | 0.731315   | 0.764388 | 8.40E-08 | 12         | 3'UTR               |
| cg08949011 | 0.060863   | 0.04731  | 2.00E-09 | 10         | Promoter-associated |
| cg08949621 | 0.178279   | 0.157101 | 1.36E-07 | 15         | Promoter-associated |
| cg08958952 | 0.857434   | 0.877879 | 4.20E-08 | 8          | Intergenic          |
| cg08959992 | 0.136443   | 0.158251 | 7.30E-08 | 12         | Body                |
| cg08964912 | 0.09869    | 0.116023 | 1.20E-08 | 20         | Promoter-associated |
| cg08974966 | 0.050087   | 0.042023 | 2.76E-07 | 11         | Body                |
| cg08975295 | 0.759907   | 0.795837 | 4.10E-08 | 12         | Intergenic          |
| cg08989921 | 0.12127    | 0.103457 | 1.40E-07 | 17         | 5'UTR               |
| cg08990198 | 0.120963   | 0.134599 | 3.26E-07 | 1          | Body                |
| cg09010904 | 0.103835   | 0.077465 | 2.84E-07 | 3          | Intergenic          |
| cg09011231 | 0.580351   | 0.50152  | 2.00E-09 | 2          | Body                |
| cg09011732 | 0.345451   | 0.274626 | 2.00E-09 | 2          | Body                |
| cg09015484 | 0.15924    | 0.185311 | 4.80E-07 | 9          | Intergenic          |
| cg09020181 | 0.231947   | 0.181783 | 3.52E-07 | 22         | Intergenic          |
| cg09026224 | 0.100684   | 0.117518 | 1.10E-08 | 5          | Body                |
| cg09028157 | 0.118627   | 0.133806 | 3.84E-07 | 6          | Promoter-associated |
| cg09047471 | 0.093528   | 0.071499 | 4.90E-08 | 8          | Body                |
| cg09058650 | 0.058394   | 0.039978 | 1.93E-07 | 16         | Body                |
| cg09061583 | 0.177756   | 0.132553 | 2.20E-07 | X          | Promoter-associated |
| cg09071838 | 0.079208   | 0.059854 | 1.28E-07 | 13         | Promoter-associated |
| cg09073732 | 0.138357   | 0.155396 | 2.31E-07 | 7          | Intergenic          |
| cg09075558 | 0.415434   | 0.332476 | 1.90E-08 | 1          | Promoter-associated |
| cg09076334 | 0.053948   | 0.043889 | 9.90E-08 | 13         | Intergenic          |
| cg09111071 | 0.051013   | 0.038001 | 0.00E+00 | 4          | Body                |
| cg09122913 | 0.131528   | 0.149598 | 2.70E-08 | 5          | Promoter-associated |
| cg09142942 | 0.112779   | 0.127632 | 1.90E-08 | 7          | Body                |
| cg09147710 | 0.11937    | 0.093851 | 1.40E-08 | 20         | 5'UTR               |
| cg09174674 | 0.048597   | 0.030648 | 4.22E-07 | 1          | 5'UTR               |
| cg09192942 | 0.09486    | 0.068451 | 1.69E-07 | 16         | Body                |
| cg09202050 | 0.55234    | 0.490408 | 2.82E-07 | 11         | Promoter-associated |
| cg09202227 | 0.13625    | 0.099744 | 1.20E-08 | 16         | Body                |
| cg09223975 | 0.896489   | 0.914929 | 4.00E-09 | 6          | Body                |
| cg09227621 | 0.108739   | 0.067038 | 4.36E-07 | 1          | Body                |
| cg09229912 | 0.127326   | 0.148419 | 4.54E-07 | 12         | Body                |
| cg09230996 | 0.096167   | 0.073946 | 3.48E-07 | 10         | Intergenic          |
| cg09242100 | 0.509085   | 0.544923 | 1.90E-08 | 19         | Body                |
| cg09251292 | 0.179446   | 0.138284 | 2.10E-08 | 6          | Body                |
| cg09260830 | 0.182737   | 0.206772 | 7.00E-09 | 9          | Body                |
| cg09264558 | 0.741262   | 0.769397 | 9.30E-08 | 1          | Intergenic          |
| cg09266144 | 0.920632   | 0.933884 | 6.60E-08 | 14         | Intergenic          |
| cg09288789 | 0.296561   | 0.359782 | 1.77E-07 | 6          | Body                |
| cg09290941 | 0.080635   | 0.061467 | 8.00E-09 | 14         | Body                |

| IlluminaID | Maltreated | Control  | p-value  | Chromosome | CpG site location   |
|------------|------------|----------|----------|------------|---------------------|
| cg09303159 | 0.153311   | 0.115049 | 5.00E-09 | 6          | Intergenic          |
| cg09303484 | 0.70138    | 0.637751 | 7.50E-08 | 7          | Intergenic          |
| cg09312767 | 0.059614   | 0.048732 | 6.10E-08 | 1          | Promoter-associated |
| cg09323228 | 0.040738   | 0.032457 | 2.46E-07 | 1          | Promoter-associated |
| cg09325905 | 0.106676   | 0.119319 | 2.73E-07 | 11         | Promoter-associated |
| cg09327849 | 0.10335    | 0.118185 | 1.33E-07 | 12         | Promoter-associated |
| cg09328979 | 0.199569   | 0.135196 | 5.50E-08 | 16         | Intergenic          |
| cg09338033 | 0.136376   | 0.156487 | 4.63E-07 | 13         | Promoter-associated |
| cg09350141 | 0.119566   | 0.137077 | 2.00E-08 | 22         | Promoter-associated |
| cg09369748 | 0.756873   | 0.787963 | 6.00E-08 | 17         | Body                |
| cg09370756 | 0.326452   | 0.272748 | 3.57E-07 | 16         | Body                |
| cg09380636 | 0.302084   | 0.241532 | 0.00E+00 | 19         | Promoter-associated |
| cg09382430 | 0.090893   | 0.071945 | 3.84E-07 | 14         | Promoter-associated |
| cg09395855 | 0.053142   | 0.043485 | 3.30E-08 | 10         | 5'UTR               |
| cg09398466 | 0.431023   | 0.399753 | 1.10E-08 | 2          | Body                |
| cg09417774 | 0.168767   | 0.187094 | 2.66E-07 | 12         | Promoter-associated |
| cg09423283 | 0.106455   | 0.07543  | 1.20E-08 | 6          | 3'UTR               |
| cg09428653 | 0.166008   | 0.20575  | 4.37E-07 | 13         | Intergenic          |
| cg09432465 | 0.875346   | 0.896914 | 3.40E-08 | 16         | Intergenic          |
| cg09435190 | 0.3726     | 0.287271 | 3.10E-08 | 22         | Body                |
| cg09439054 | 0.245461   | 0.185593 | 2.00E-09 | 19         | Body                |
| cg09443102 | 0.133708   | 0.111531 | 2.54E-07 | 21         | Body                |
| cg09460159 | 0.072359   | 0.053867 | 4.28E-07 | 17         | Promoter-associated |
| cg09487594 | 0.556433   | 0.507621 | 3.70E-08 | 10         | Body                |
| cg09501892 | 0.211135   | 0.267044 | 2.28E-07 | 1          | Promoter-associated |
| cg09504352 | 0.077495   | 0.089085 | 1.45E-07 | 12         | Promoter-associated |
| cg09526697 | 0.862476   | 0.896767 | 0.00E+00 | 4          | Body                |
| cg09529537 | 0.129812   | 0.147363 | 1.57E-07 | 5          | Promoter-associated |
| cg09540961 | 0.186776   | 0.170444 | 2.45E-07 | 20         | Body                |
| cg09550397 | 0.117802   | 0.137087 | 6.50E-08 | 6          | Body                |
| cg09553402 | 0.03361    | 0.027054 | 3.10E-08 | 5          | 5'UTR               |
| cg09578018 | 0.150068   | 0.17098  | 6.20E-08 | 15         | Body                |
| cg09598225 | 0.112945   | 0.130232 | 7.70E-08 | 20         | Body                |
| cg09610601 | 0.110779   | 0.131548 | 2.10E-08 | 15         | Promoter-associated |
| cg09652614 | 0.909682   | 0.881307 | 2.09E-07 | 12         | Intergenic          |
| cg09655666 | 0.102713   | 0.075484 | 8.10E-08 | 17         | Intergenic          |
| cg09660365 | 0.124224   | 0.099447 | 1.40E-07 | 3          | Body                |
| cg09667001 | 0.320616   | 0.245442 | 1.00E-09 | 17         | Intergenic          |
| cg09677638 | 0.116909   | 0.133504 | 1.06E-07 | 11         | Promoter-associated |
| cg09685682 | 0.119548   | 0.139295 | 4.28E-07 | 16         | Body                |
| cg09692125 | 0.83316    | 0.860139 | 2.00E-09 | 12         | Body                |
| cg09698471 | 0.131634   | 0.105153 | 2.98E-07 | 5          | Body                |
| cg09717987 | 0.091681   | 0.109431 | 4.90E-08 | 2          | Promoter-associated |
| cg09723155 | 0.122841   | 0.139635 | 3.95E-07 | 17         | Promoter-associated |
| cg09725546 | 0.183013   | 0.139161 | 4.80E-08 | 7          | Body                |
| cg09740133 | 0.196257   | 0.24384  | 1.98E-07 | 12         | Promoter-associated |
| cg09741592 | 0.398584   | 0.444616 | 1.30E-08 | 12         | Body                |
| cg09746736 | 0.064151   | 0.046406 | 2.00E-08 | 16         | Body                |
| cg09754868 | 0.024722   | 0.020674 | 1.70E-08 | 1          | Promoter-associated |
| cg09755102 | 0.175869   | 0.209777 | 2.00E-09 | 1          | 5'UTR               |
| cg09763060 | 0.936367   | 0.918927 | 6.80E-08 | 16         | Intergenic          |
| cg09765074 | 0.828604   | 0.872991 | 3.74E-07 | 10         | Intergenic          |
| cg09770154 | 0.122659   | 0.145247 | 8.80E-08 | 10         | Body                |

| IlluminaID | Maltreated | Control  | p-value  | Chromosome | CpG site location   |
|------------|------------|----------|----------|------------|---------------------|
| cg09780895 | 0.123903   | 0.140545 | 1.48E-07 | 19         | Promoter-associated |
| cg09781601 | 0.091682   | 0.104128 | 1.47E-07 | 9          | 5'UTR               |
| cg09786701 | 0.092642   | 0.072232 | 1.55E-07 | 20         | Body                |
| cg09789536 | 0.423448   | 0.34852  | 0.00E+00 | 1          | Body                |
| cg09792881 | 0.366335   | 0.271908 | 1.00E-07 | 1          | Body                |
| cg09796320 | 0.091452   | 0.064093 | 3.40E-08 | 7          | Promoter-associated |
| cg09796886 | 0.22168    | 0.189445 | 3.80E-08 | 4          | Promoter-associated |
| cg09817636 | 0.198266   | 0.151402 | 1.00E-08 | 1          | Intergenic          |
| cg09818588 | 0.186966   | 0.153859 | 2.23E-07 | 4          | Promoter-associated |
| cg09824849 | 0.339901   | 0.286069 | 1.70E-07 | 20         | Promoter-associated |
| cg09827752 | 0.035295   | 0.024424 | 2.26E-07 | 1          | Body                |
| cg09852601 | 0.062102   | 0.038871 | 6.90E-08 | 17         | Body                |
| cg09872104 | 0.217639   | 0.170132 | 4.29E-07 | 7          | Body                |
| cg09882128 | 0.019676   | 0.015077 | 6.50E-08 | 10         | Body                |
| cg09882587 | 0.169841   | 0.183499 | 4.61E-07 | 5          | 5'UTR               |
| cg09884077 | 0.141012   | 0.16555  | 1.70E-08 | 15         | Promoter-associated |
| cg09890653 | 0.13253    | 0.106249 | 4.10E-07 | 11         | Body                |
| cg09892131 | 0.117887   | 0.136463 | 2.43E-07 | 6          | Promoter-associated |
| cg09898070 | 0.2128     | 0.155166 | 3.00E-09 | 2          | Promoter-associated |
| cg09901735 | 0.109268   | 0.124581 | 9.80E-08 | 16         | Promoter-associated |
| cg09920427 | 0.166599   | 0.186314 | 2.20E-08 | 19         | 5'UTR               |
| cg09933058 | 0.046834   | 0.035073 | 1.56E-07 | 12         | Body                |
| cg09939823 | 0.757491   | 0.790586 | 9.00E-09 | 8          | Intergenic          |
| cg09961550 | 0.033961   | 0.025586 | 6.00E-09 | 16         | Promoter-associated |
| cg09964670 | 0.052062   | 0.035999 | 2.34E-07 | 19         | Promoter-associated |
| cg09965508 | 0.615703   | 0.572836 | 2.60E-08 | 11         | Intergenic          |
| cg09984392 | 0.129005   | 0.091822 | 9.10E-08 | 8          | Promoter-associated |
| cg10000843 | 0.093058   | 0.078928 | 1.68E-07 | 15         | Promoter-associated |
| cg10009930 | 0.14202    | 0.116221 | 0.00E+00 | 1          | Promoter-associated |
| cg10027245 | 0.830737   | 0.850292 | 4.84E-07 | 6          | Body                |
| cg10031648 | 0.741431   | 0.794942 | 1.00E-09 | 16         | 3'UTR               |
| cg10033761 | 0.508623   | 0.466256 | 2.00E-09 | 2          | 5'UTR               |
| cg10045999 | 0.193905   | 0.262548 | 4.20E-08 | 11         | 5'UTR               |
| cg10055505 | 0.549249   | 0.508554 | 3.12E-07 | 1          | Body                |
| cg10058779 | 0.077157   | 0.059332 | 7.80E-08 | 14         | Body                |
| cg10060574 | 0.163251   | 0.184383 | 2.29E-07 | 6          | Promoter-associated |
| cg10066545 | 0.845131   | 0.874292 | 1.00E-09 | 7          | Intergenic          |
| cg10111845 | 0.085458   | 0.070594 | 1.37E-07 | 12         | Promoter-associated |
| cg10117795 | 0.075665   | 0.055735 | 3.30E-08 | 1          | Intergenic          |
| cg10133465 | 0.169611   | 0.131473 | 1.04E-07 | 8          | Body                |
| cg10134307 | 0.702288   | 0.736602 | 3.70E-08 | 14         | Intergenic          |
| cg10137463 | 0.080465   | 0.058448 | 1.51E-07 | 15         | Promoter-associated |
| cg10143433 | 0.3615     | 0.276199 | 0.00E+00 | 3          | Promoter-associated |
| cg10143723 | 0.101776   | 0.12088  | 4.00E-08 | 12         | Promoter-associated |
| cg10156544 | 0.06293    | 0.045962 | 8.00E-08 | 12         | Promoter-associated |
| cg10161423 | 0.331641   | 0.269501 | 3.15E-07 | 7          | 5'UTR               |
| cg10177591 | 0.138307   | 0.167198 | 2.00E-08 | 6          | 5'UTR               |
| cg10195787 | 0.140075   | 0.156482 | 2.11E-07 | 2          | Promoter-associated |
| cg10201608 | 0.134929   | 0.154932 | 2.52E-07 | 2          | 5'UTR               |
| cg10207428 | 0.150867   | 0.170837 | 1.40E-08 | 6          | Intergenic          |
| cg10230004 | 0.652944   | 0.591311 | 0.00E+00 | 6          | Body                |
| cg10230519 | 0.811307   | 0.840535 | 9.60E-08 | 22         | Intergenic          |
| cg10241147 | 0.044927   | 0.037201 | 2.50E-07 | 1          | Body                |

| lluminalID | Maltreated | Control  | p-value  | Chromosome | CpG site location   |
|------------|------------|----------|----------|------------|---------------------|
| cg10252462 | 0.103431   | 0.119671 | 2.30E-08 | 9          | Body                |
| cg10266386 | 0.179871   | 0.201765 | 2.76E-07 | 19         | Body                |
| cg10269548 | 0.093024   | 0.072228 | 3.60E-08 | 4          | Promoter-associated |
| cg10270436 | 0.775035   | 0.812085 | 4.80E-08 | 4          | Intergenic          |
| cg10277631 | 0.108627   | 0.12676  | 1.24E-07 | 14         | Body                |
| cg10282807 | 0.071206   | 0.050416 | 2.80E-08 | 12         | Body                |
| cg10304922 | 0.100457   | 0.078151 | 2.24E-07 | 12         | Body                |
| cg10308833 | 0.072721   | 0.059281 | 7.70E-08 | 6          | Intergenic          |
| cg10335659 | 0.086189   | 0.101696 | 6.00E-09 | 2          | Body                |
| cg10345131 | 0.105612   | 0.086134 | 2.89E-07 | 15         | Promoter-associated |
| cg10356455 | 0.127769   | 0.146134 | 4.21E-07 | 2          | Promoter-associated |
| cg10364942 | 0.309549   | 0.371852 | 7.00E-09 | 21         | 3'UTR               |
| cg10364945 | 0.904701   | 0.918873 | 1.61E-07 | 2          | 3'UTR               |
| cg10365447 | 0.072076   | 0.051837 | 8.20E-08 | 6          | Body                |
| cg10367023 | 0.132683   | 0.110213 | 2.90E-08 | 2          | Intergenic          |
| cg10369444 | 0.479477   | 0.443742 | 5.20E-08 | 13         | Body                |
| cg10397063 | 0.018231   | 0.014033 | 1.71E-07 | 6          | Body                |
| cg10398799 | 0.244696   | 0.30075  | 2.73E-07 | 10         | Body                |
| cg10408430 | 0.821567   | 0.856261 | 2.40E-07 | 11         | Body                |
| cg10409443 | 0.797675   | 0.834645 | 1.00E-09 | 16         | Intergenic          |
| cg10410170 | 0.172165   | 0.220363 | 5.20E-08 | 8          | Promoter-associated |
| cg10414985 | 0.194356   | 0.143608 | 8.90E-08 | 10         | Intergenic          |
| cg10432265 | 0.066936   | 0.045443 | 1.00E-09 | 11         | Promoter-associated |
| cg10441628 | 0.099608   | 0.090535 | 4.50E-08 | 5          | Body                |
| cg10446143 | 0.161221   | 0.182455 | 1.00E-09 | 21         | Promoter-associated |
| cg10447247 | 0.828274   | 0.860804 | 6.00E-09 | 12         | Body                |
| cg10462093 | 0.042894   | 0.034691 | 1.80E-08 | 12         | 5'UTR               |
| cg10469659 | 0.308078   | 0.211291 | 1.07E-07 | 15         | Promoter-associated |
| cg10481982 | 0.114212   | 0.082731 | 3.00E-09 | 12         | Promoter-associated |
| cg10483776 | 0.108295   | 0.125257 | 1.62E-07 | 15         | Promoter-associated |
| cg10485466 | 0.149281   | 0.113602 | 4.98E-07 | 15         | Promoter-associated |
| cg10488267 | 0.099212   | 0.078381 | 3.00E-09 | 6          | Intergenic          |
| cg10492801 | 0.058982   | 0.049707 | 3.55E-07 | 17         | Body                |
| cg10497951 | 0.786873   | 0.810114 | 4.45E-07 | 11         | Body                |
| cg10498984 | 0.149089   | 0.121055 | 2.01E-07 | 16         | Body                |
| cg10505247 | 0.08777    | 0.069041 | 4.40E-08 | 1          | Promoter-associated |
| cg10506160 | 0.081179   | 0.061695 | 2.80E-08 | 16         | Promoter-associated |
| cg10538494 | 0.098754   | 0.074351 | 0.00E+00 | 14         | Promoter-associated |
| cg10545927 | 0.125618   | 0.142117 | 1.11E-07 | 1          | Body                |
| cg10570662 | 0.138189   | 0.114567 | 1.26E-07 | 22         | Intergenic          |
| cg10573403 | 0.113917   | 0.128435 | 1.92E-07 | 14         | Body                |
| cg10585733 | 0.810328   | 0.84071  | 0.00E+00 | 1          | Intergenic          |
| cg10601287 | 0.20255    | 0.170386 | 3.12E-07 | 11         | Body                |
| cg10617171 | 0.165116   | 0.18367  | 5.40E-08 | 19         | Body                |
| cg10620530 | 0.12957    | 0.145291 | 8.00E-09 | 9          | 5'UTR               |
| cg10624105 | 0.158433   | 0.178001 | 2.70E-08 | 20         | Body                |
| cg10624161 | 0.0688     | 0.05433  | 1.10E-08 | 6          | Body                |
| cg10632328 | 0.178035   | 0.129596 | 2.49E-07 | 17         | Body                |
| cg10633746 | 0.142419   | 0.162381 | 4.54E-07 | 17         | 5'UTR               |
| cg10651637 | 0.469924   | 0.38172  | 0.00E+00 | 15         | Promoter-associated |
| cg10657367 | 0.217935   | 0.294465 | 3.51E-07 | 19         | Promoter-associated |
| cg10658205 | 0.657636   | 0.69944  | 4.87E-07 | 5          | Intergenic          |
| cg10659575 | 0.158887   | 0.183589 | 1.10E-08 | 11         | 5'UTR               |



| lluminalID | Maltreated | Control  | p-value  | Chromosome | CpG site location   |
|------------|------------|----------|----------|------------|---------------------|
| cg10675138 | 0.169173   | 0.192543 | 1.14E-07 | 6          | 5'UTR               |
| cg10688514 | 0.138284   | 0.115139 | 2.13E-07 | 10         | Promoter-associated |
| cg10693390 | 0.732502   | 0.773104 | 4.00E-08 | 11         | Body                |
| cg10695429 | 0.283508   | 0.233771 | 4.38E-07 | 3          | Body                |
| cg10696437 | 0.192695   | 0.212482 | 2.11E-07 | 13         | Promoter-associated |
| cg10727759 | 0.087948   | 0.060839 | 2.41E-07 | 12         | Promoter-associated |
| cg10735211 | 0.707098   | 0.798176 | 0.00E+00 | 4          | Body                |
| cg10765857 | 0.244087   | 0.2048   | 1.24E-07 | 11         | 5'UTR               |
| cg10795659 | 0.102998   | 0.077454 | 9.30E-08 | 5          | Body                |
| cg10797195 | 0.117447   | 0.132129 | 6.10E-08 | 1          | Body                |
| cg10806562 | 0.733618   | 0.764598 | 1.51E-07 | 17         | Body                |
| cg10819350 | 0.165788   | 0.121825 | 1.94E-07 | 19         | Promoter-associated |
| cg10833037 | 0.135727   | 0.110491 | 3.00E-09 | 10         | Body                |
| cg10836402 | 0.119028   | 0.13865  | 3.47E-07 | 12         | Body                |
| cg10837265 | 0.041304   | 0.028383 | 1.88E-07 | 1          | 5'UTR               |
| cg10844844 | 0.157413   | 0.182773 | 2.00E-09 | 6          | Promoter-associated |
| cg10848792 | 0.026688   | 0.019037 | 2.98E-07 | 2          | Body                |
| cg10850626 | 0.095233   | 0.108372 | 1.40E-08 | 15         | Body                |
| cg10858225 | 0.129687   | 0.151191 | 4.40E-08 | 5          | Promoter-associated |
| cg10861555 | 0.422688   | 0.3785   | 5.30E-08 | X          | Promoter-associated |
| cg10881360 | 0.106581   | 0.085333 | 9.90E-08 | 1          | Promoter-associated |
| cg10882304 | 0.339874   | 0.270228 | 1.50E-08 | 10         | Body                |
| cg10882606 | 0.103578   | 0.118126 | 5.70E-08 | 6          | Promoter-associated |
| cg10902427 | 0.183232   | 0.136602 | 3.10E-08 | 5          | Promoter-associated |
| cg10905613 | 0.093356   | 0.106189 | 1.70E-08 | 17         | Promoter-associated |
| cg10905877 | 0.21743    | 0.158408 | 0.00E+00 | 3          | Body                |
| cg10916494 | 0.101779   | 0.117679 | 1.95E-07 | 6          | Body                |
| cg10921983 | 0.05325    | 0.042357 | 3.40E-08 | 12         | 5'UTR               |
| cg10945028 | 0.75024    | 0.778082 | 3.00E-09 | 8          | Intergenic          |
| cg10953317 | 0.120587   | 0.086524 | 1.39E-07 | 17         | Promoter-associated |
| cg10960198 | 0.807815   | 0.82859  | 5.00E-08 | 4          | Intergenic          |
| cg10987004 | 0.904632   | 0.918528 | 2.30E-07 | 1          | Body                |
| cg10988124 | 0.362247   | 0.27641  | 2.68E-07 | 3          | Intergenic          |
| cg10992590 | 0.240041   | 0.201198 | 2.09E-07 | 2          | Body                |
| cg11002791 | 0.079453   | 0.097186 | 7.00E-09 | 17         | Promoter-associated |
| cg11017057 | 0.152943   | 0.173975 | 3.50E-07 | 3          | Body                |
| cg11022944 | 0.171848   | 0.107882 | 2.00E-09 | 5          | Promoter-associated |
| cg11027325 | 0.123496   | 0.095792 | 1.71E-07 | 2          | 5'UTR               |
| cg11033713 | 0.093209   | 0.108572 | 6.10E-08 | 5          | Promoter-associated |
| cg11046393 | 0.134273   | 0.155012 | 1.66E-07 | 1          | Promoter-associated |
| cg11050859 | 0.406684   | 0.35984  | 4.70E-08 | 8          | Body                |
| cg11061177 | 0.235603   | 0.178483 | 0.00E+00 | 10         | Promoter-associated |
| cg11071397 | 0.044137   | 0.036123 | 1.20E-07 | 17         | Promoter-associated |
| cg11082575 | 0.117196   | 0.132007 | 3.46E-07 | 12         | Body                |
| cg11082691 | 0.257408   | 0.317251 | 4.77E-07 | 13         | Body                |
| cg11087358 | 0.152228   | 0.174251 | 1.20E-08 | 12         | Promoter-associated |
| cg11105980 | 0.161159   | 0.130174 | 3.03E-07 | 13         | Promoter-associated |
| cg11116142 | 0.100009   | 0.115539 | 3.81E-07 | 3          | Promoter-associated |
| cg11138318 | 0.515875   | 0.466699 | 1.78E-07 | 1          | Body                |
| cg11154970 | 0.852359   | 0.882832 | 0.00E+00 | 14         | Intergenic          |
| cg11176493 | 0.051046   | 0.039086 | 2.10E-08 | 1          | Promoter-associated |
| cg11180288 | 0.209511   | 0.234168 | 2.92E-07 | 17         | Promoter-associated |
| cg11199046 | 0.102199   | 0.074437 | 3.02E-07 | 12         | Intergenic          |

| IlluminaID | Maltreated | Control  | p-value  | Chromosome | CpG site location   |
|------------|------------|----------|----------|------------|---------------------|
| cg11226328 | 0.116186   | 0.138027 | 5.00E-09 | 1          | Body                |
| cg11227075 | 0.196235   | 0.15723  | 2.30E-08 | 10         | Body                |
| cg11227604 | 0.231265   | 0.180772 | 0.00E+00 | 6          | Promoter-associated |
| cg11228682 | 0.236646   | 0.286935 | 3.28E-07 | 6          | Promoter-associated |
| cg11231240 | 0.54784    | 0.502989 | 1.10E-07 | 8          | Intergenic          |
| cg11248668 | 0.137551   | 0.15789  | 1.02E-07 | 11         | Body                |
| cg11258043 | 0.034096   | 0.026796 | 3.52E-07 | 6          | Promoter-associated |
| cg11271685 | 0.541143   | 0.49877  | 3.40E-08 | 19         | Body                |
| cg11292385 | 0.169449   | 0.190996 | 2.73E-07 | 22         | Body                |
| cg11310629 | 0.143743   | 0.166549 | 1.10E-08 | 13         | Promoter-associated |
| cg11311843 | 0.25867    | 0.163761 | 0.00E+00 | 17         | Body                |
| cg11329058 | 0.39174    | 0.469706 | 4.50E-08 | 17         | Body                |
| cg11342468 | 0.049921   | 0.040928 | 6.70E-08 | 12         | Body                |
| cg11343086 | 0.16892    | 0.186867 | 4.87E-07 | 1          | Body                |
| cg11356706 | 0.068079   | 0.051504 | 1.66E-07 | 20         | Body                |
| cg11361409 | 0.837443   | 0.868706 | 1.20E-08 | 11         | Intergenic          |
| cg11371681 | 0.158109   | 0.183913 | 1.36E-07 | 1          | Promoter-associated |
| cg11374834 | 0.270142   | 0.187639 | 3.29E-07 | 3          | Intergenic          |
| cg11381792 | 0.216696   | 0.176701 | 0.00E+00 | 21         | Promoter-associated |
| cg11382976 | 0.498818   | 0.454722 | 5.00E-09 | 6          | Promoter-associated |
| cg11395536 | 0.060158   | 0.04549  | 3.64E-07 | 1          | 5'UTR               |
| cg11399891 | 0.133397   | 0.14857  | 4.23E-07 | 19         | Promoter-associated |
| cg11408656 | 0.103953   | 0.074978 | 4.00E-09 | 1          | Body                |
| cg11412766 | 0.073524   | 0.05801  | 1.65E-07 | 2          | 5'UTR               |
| cg11415548 | 0.878869   | 0.896944 | 3.50E-08 | 10         | Body                |
| cg11415932 | 0.106609   | 0.124715 | 7.30E-08 | 8          | Promoter-associated |
| cg11429969 | 0.151957   | 0.121056 | 2.78E-07 | 5          | Body                |
| cg11434705 | 0.319035   | 0.248881 | 2.37E-07 | 19         | Intergenic          |
| cg11440030 | 0.057585   | 0.038864 | 4.00E-07 | 3          | Intergenic          |
| cg11505238 | 0.826086   | 0.808538 | 2.51E-07 | 11         | Body                |
| cg11509269 | 0.263872   | 0.310735 | 1.05E-07 | 22         | Promoter-associated |
| cg11525834 | 0.1774     | 0.129742 | 7.00E-09 | 7          | Body                |
| cg11528995 | 0.090892   | 0.060284 | 2.78E-07 | 1          | Body                |
| cg11542063 | 0.053822   | 0.043968 | 1.93E-07 | 2          | Body                |
| cg11551419 | 0.128624   | 0.150827 | 1.34E-07 | 20         | Promoter-associated |
| cg11563264 | 0.212341   | 0.146258 | 2.10E-08 | 4          | Body                |
| cg11574001 | 0.10455    | 0.08349  | 2.00E-08 | 11         | Body                |
| cg11588001 | 0.089797   | 0.069594 | 1.43E-07 | 19         | Body                |
| cg11606444 | 0.716898   | 0.640959 | 1.00E-08 | 11         | Promoter-associated |
| cg11655629 | 0.052931   | 0.041538 | 3.70E-08 | 7          | Intergenic          |
| cg11656663 | 0.038311   | 0.027045 | 1.58E-07 | 1          | 5'UTR               |
| cg11662452 | 0.868035   | 0.889813 | 1.10E-07 | 6          | Intergenic          |
| cg11677260 | 0.251805   | 0.198378 | 2.00E-09 | 10         | Intergenic          |
| cg11687746 | 0.106157   | 0.120776 | 1.00E-07 | 2          | Promoter-associated |
| cg11689407 | 0.054023   | 0.042602 | 5.80E-08 | 10         | Intergenic          |
| cg11713664 | 0.098262   | 0.072563 | 3.10E-08 | 1          | Intergenic          |
| cg11745084 | 0.194247   | 0.16212  | 1.00E-09 | 20         | Body                |
| cg11753286 | 0.158976   | 0.174878 | 3.40E-07 | 6          | Promoter-associated |
| cg11755053 | 0.02807    | 0.022163 | 1.39E-07 | 5          | Body                |
| cg11769086 | 0.113505   | 0.128298 | 5.30E-08 | 1          | Promoter-associated |
| cg11769841 | 0.193525   | 0.147875 | 1.00E-09 | 22         | Promoter-associated |
| cg11776336 | 0.681276   | 0.713866 | 2.32E-07 | 17         | Body                |
| cg11776727 | 0.910415   | 0.926103 | 5.00E-08 | 11         | Body                |

| IlluminaID | Maltreated | Control  | p-value  | Chromosome | CpG site location   |
|------------|------------|----------|----------|------------|---------------------|
| cg11782830 | 0.131235   | 0.150389 | 3.70E-08 | 13         | Body                |
| cg11795459 | 0.825293   | 0.854015 | 1.22E-07 | 7          | Body                |
| cg11797222 | 0.410679   | 0.369058 | 3.70E-08 | 15         | Promoter-associated |
| cg11798360 | 0.124982   | 0.154115 | 9.00E-09 | 19         | 5'UTR               |
| cg11808639 | 0.273929   | 0.227663 | 9.00E-09 | 2          | Intergenic          |
| cg11814422 | 0.105234   | 0.124887 | 4.00E-09 | 18         | 5'UTR               |
| cg11843700 | 0.032603   | 0.023967 | 4.00E-09 | 19         | Promoter-associated |
| cg11844827 | 0.020915   | 0.017379 | 4.70E-08 | 7          | Body                |
| cg11854579 | 0.109312   | 0.125673 | 2.73E-07 | 3          | Promoter-associated |
| cg11862080 | 0.026436   | 0.021112 | 3.50E-07 | 6          | Body                |
| cg11867012 | 0.142766   | 0.105594 | 3.94E-07 | 19         | Promoter-associated |
| cg11877384 | 0.113887   | 0.132247 | 2.42E-07 | 4          | Body                |
| cg11886014 | 0.147062   | 0.165282 | 2.34E-07 | 5          | Promoter-associated |
| cg11896012 | 0.646711   | 0.583055 | 0.00E+00 | 19         | Promoter-associated |
| cg11901034 | 0.073358   | 0.051767 | 1.82E-07 | 3          | Body                |
| cg11912179 | 0.914309   | 0.926262 | 2.10E-08 | 11         | Body                |
| cg11928684 | 0.063181   | 0.045718 | 3.37E-07 | 11         | Body                |
| cg11952315 | 0.128175   | 0.150503 | 1.44E-07 | 17         | Promoter-associated |
| cg11953383 | 0.091332   | 0.061392 | 2.20E-08 | 11         | Body                |
| cg11957128 | 0.750126   | 0.783525 | 5.00E-08 | 2          | Body                |
| cg12006425 | 0.119419   | 0.096009 | 1.00E-09 | 10         | 5'UTR               |
| cg12037450 | 0.398718   | 0.334515 | 2.20E-08 | 1          | 5'UTR               |
| cg12060744 | 0.158981   | 0.124907 | 2.80E-08 | 19         | Body                |
| cg12063218 | 0.325701   | 0.251987 | 4.20E-08 | 20         | Promoter-associated |
| cg12064507 | 0.827139   | 0.851654 | 1.36E-07 | 19         | Intergenic          |
| cg12071328 | 0.040622   | 0.029499 | 1.31E-07 | 11         | Body                |
| cg12074084 | 0.057076   | 0.045801 | 3.19E-07 | 1          | Body                |
| cg12075659 | 0.124823   | 0.140681 | 3.29E-07 | 20         | Intergenic          |
| cg12107626 | 0.150031   | 0.170308 | 4.40E-07 | 17         | Body                |
| cg12118832 | 0.137111   | 0.160642 | 1.72E-07 | 3          | Intergenic          |
| cg12121634 | 0.751079   | 0.775376 | 6.70E-08 | 22         | Body                |
| cg12122403 | 0.192437   | 0.244853 | 2.26E-07 | 19         | Promoter-associated |
| cg12149777 | 0.107251   | 0.071776 | 4.40E-08 | 4          | Promoter-associated |
| cg12159836 | 0.775709   | 0.799479 | 1.47E-07 | 4          | 5'UTR               |
| cg12219753 | 0.075864   | 0.087722 | 6.70E-08 | 18         | Body                |
| cg12230010 | 0.117096   | 0.140203 | 1.20E-08 | 10         | Promoter-associated |
| cg12230071 | 0.081681   | 0.065638 | 3.14E-07 | 15         | Promoter-associated |
| cg12241367 | 0.209549   | 0.170607 | 2.00E-09 | 10         | Promoter-associated |
| cg12256311 | 0.211513   | 0.145623 | 0.00E+00 | 17         | Promoter-associated |
| cg12263794 | 0.68988    | 0.727253 | 2.00E-09 | 6          | Body                |
| cg12305200 | 0.150668   | 0.118468 | 3.50E-07 | 2          | Body                |
| cg12310757 | 0.134875   | 0.156312 | 3.49E-07 | 9          | Promoter-associated |
| cg12315590 | 0.145697   | 0.170455 | 9.90E-08 | 3          | Promoter-associated |
| cg12317505 | 0.730077   | 0.676901 | 2.65E-07 | 10         | Body                |
| cg12330727 | 0.574934   | 0.548255 | 1.00E-09 | 11         | Body                |
| cg12332454 | 0.101972   | 0.116921 | 1.92E-07 | 11         | Promoter-associated |
| cg12333707 | 0.521114   | 0.463295 | 2.05E-07 | 5          | Promoter-associated |
| cg12338417 | 0.044582   | 0.031511 | 0.00E+00 | 3          | Body                |
| cg12367274 | 0.721086   | 0.66747  | 3.80E-08 | 2          | Body                |
| cg12377139 | 0.09915    | 0.075502 | 4.36E-07 | 10         | Body                |
| cg12377745 | 0.241634   | 0.198526 | 8.00E-08 | 7          | Body                |
| cg12390237 | 0.799977   | 0.839539 | 2.00E-09 | 15         | Body                |
| cg12416067 | 0.108404   | 0.095433 | 1.00E-09 | 10         | Promoter-associated |

| lluminalID | Maltreated | Control  | p-value  | Chromosome | CpG site location   |
|------------|------------|----------|----------|------------|---------------------|
| cg12428043 | 0.119661   | 0.136666 | 3.77E-07 | 7          | Promoter-associated |
| cg12436738 | 0.065248   | 0.042187 | 2.20E-08 | 2          | Body                |
| cg12442242 | 0.21313    | 0.165483 | 0.00E+00 | 7          | Promoter-associated |
| cg12442899 | 0.477651   | 0.415307 | 1.06E-07 | 6          | Promoter-associated |
| cg12495559 | 0.393558   | 0.334909 | 2.55E-07 | 17         | Intergenic          |
| cg12502155 | 0.478752   | 0.430762 | 1.50E-08 | 15         | Promoter-associated |
| cg12506373 | 0.160221   | 0.180606 | 1.09E-07 | 2          | Promoter-associated |
| cg12544191 | 0.121022   | 0.100708 | 9.20E-08 | 5          | Intergenic          |
| cg12547658 | 0.089304   | 0.072178 | 1.60E-08 | 10         | Body                |
| cg12556608 | 0.111838   | 0.073036 | 1.00E-09 | 7          | Intergenic          |
| cg12559031 | 0.136966   | 0.153797 | 3.10E-08 | 17         | Body                |
| cg12560154 | 0.113544   | 0.129847 | 1.70E-07 | 19         | Promoter-associated |
| cg12568633 | 0.08191    | 0.059898 | 2.97E-07 | 10         | Promoter-associated |
| cg12588699 | 0.120798   | 0.137996 | 2.93E-07 | 1          | Body                |
| cg12590063 | 0.787223   | 0.748162 | 1.00E-09 | 1          | Body                |
| cg12593421 | 0.637809   | 0.581903 | 1.60E-08 | 15         | Body                |
| cg12612340 | 0.052962   | 0.037586 | 6.30E-08 | 11         | Promoter-associated |
| cg12612668 | 0.13729    | 0.159363 | 5.10E-08 | 7          | Promoter-associated |
| cg12619940 | 0.217134   | 0.153562 | 1.20E-08 | 2          | 3'UTR               |
| cg12622040 | 0.815401   | 0.834739 | 2.00E-09 | 4          | Intergenic          |
| cg12622721 | 0.872112   | 0.899509 | 0.00E+00 | 1          | Intergenic          |
| cg12627695 | 0.202575   | 0.156559 | 1.00E-09 | 7          | Body                |
| cg12636108 | 0.035475   | 0.027728 | 1.00E-08 | 5          | 5'UTR               |
| cg12658129 | 0.215989   | 0.2375   | 4.12E-07 | 18         | Promoter-associated |
| cg12659254 | 0.740516   | 0.785781 | 2.00E-09 | 12         | Body                |
| cg12659381 | 0.188649   | 0.20959  | 3.77E-07 | 6          | Body                |
| cg12663656 | 0.039237   | 0.030133 | 4.90E-08 | 12         | Promoter-associated |
| cg12693702 | 0.060343   | 0.045646 | 1.63E-07 | 7          | Promoter-associated |
| cg12698713 | 0.637066   | 0.532195 | 4.10E-08 | 6          | Intergenic          |
| cg12698834 | 0.091594   | 0.071337 | 4.74E-07 | 17         | Promoter-associated |
| cg12700464 | 0.097648   | 0.114719 | 2.10E-07 | 11         | Promoter-associated |
| cg12704157 | 0.021717   | 0.016641 | 7.70E-08 | 10         | Intergenic          |
| cg12721145 | 0.394276   | 0.293574 | 1.00E-09 | 4          | Promoter-associated |
| cg12738349 | 0.171118   | 0.131363 | 5.70E-08 | 22         | Promoter-associated |
| cg12748612 | 0.600356   | 0.556038 | 1.54E-07 | 1          | Intergenic          |
| cg12753518 | 0.13998    | 0.15845  | 2.54E-07 | 1          | Promoter-associated |
| cg12755035 | 0.784012   | 0.808292 | 7.70E-08 | 2          | 5'UTR               |
| cg12756396 | 0.27863    | 0.199562 | 1.00E-09 | 1          | Body                |
| cg12763900 | 0.081446   | 0.09672  | 9.10E-08 | 3          | Promoter-associated |
| cg12765028 | 0.27764    | 0.24404  | 3.87E-07 | 4          | Intergenic          |
| cg12774921 | 0.755395   | 0.784067 | 4.54E-07 | 16         | Body                |
| cg12799349 | 0.100259   | 0.086068 | 2.15E-07 | 18         | Promoter-associated |
| cg12810096 | 0.026563   | 0.020126 | 4.00E-08 | 17         | Body                |
| cg12811319 | 0.274656   | 0.31635  | 3.55E-07 | 8          | Body                |
| cg12838902 | 0.320715   | 0.239234 | 0.00E+00 | 7          | Body                |
| cg12847399 | 0.03491    | 0.026632 | 1.00E-08 | 19         | Body                |
| cg12860753 | 0.626876   | 0.588864 | 1.32E-07 | 14         | Body                |
| cg12868305 | 0.096674   | 0.108012 | 2.71E-07 | 19         | Body                |
| cg12872693 | 0.086896   | 0.061787 | 2.44E-07 | 3          | Promoter-associated |
| cg12877462 | 0.145982   | 0.167438 | 1.62E-07 | 4          | 5'UTR               |
| cg12885244 | 0.038241   | 0.030171 | 2.33E-07 | 2          | Promoter-associated |
| cg12897942 | 0.099871   | 0.115397 | 1.03E-07 | 3          | Body                |
| cg12903924 | 0.054798   | 0.037979 | 1.60E-08 | 2          | Promoter-associated |

| lluminaID  | Maltreated | Control  | p-value  | Chromosome | CpG site location   |
|------------|------------|----------|----------|------------|---------------------|
| cg12904880 | 0.112953   | 0.07182  | 0.00E+00 | 6          | Body                |
| cg12914251 | 0.118192   | 0.138593 | 4.00E-08 | 18         | Promoter-associated |
| cg12914362 | 0.138456   | 0.159202 | 8.40E-08 | 10         | Body                |
| cg12927203 | 0.031349   | 0.022542 | 2.00E-09 | 7          | Promoter-associated |
| cg12955441 | 0.081109   | 0.059335 | 4.64E-07 | 18         | Body                |
| cg12976582 | 0.225005   | 0.181155 | 4.42E-07 | 3          | Promoter-associated |
| cg12989128 | 0.097481   | 0.073798 | 2.90E-08 | 20         | Body                |
| cg12990591 | 0.111508   | 0.086274 | 4.21E-07 | 4          | Promoter-associated |
| cg13005202 | 0.370003   | 0.28024  | 1.20E-07 | 5          | Intergenic          |
| cg13014103 | 0.086604   | 0.066229 | 3.32E-07 | 6          | Body                |
| cg13018448 | 0.178939   | 0.144476 | 1.25E-07 | 6          | Body                |
| cg13027404 | 0.089638   | 0.065096 | 7.30E-08 | 15         | Intergenic          |
| cg13031449 | 0.159799   | 0.178469 | 3.65E-07 | 14         | Promoter-associated |
| cg13058214 | 0.349497   | 0.279887 | 1.30E-08 | 11         | Body                |
| cg13059459 | 0.328575   | 0.273609 | 3.22E-07 | 15         | Intergenic          |
| cg13065121 | 0.120357   | 0.090406 | 4.76E-07 | 1          | 3'UTR               |
| cg13085681 | 0.554079   | 0.51268  | 3.82E-07 | 8          | Promoter-associated |
| cg13088939 | 0.053959   | 0.042947 | 5.10E-08 | 1          | 5'UTR               |
| cg13094511 | 0.060546   | 0.051288 | 0.00E+00 | 2          | Body                |
| cg13119035 | 0.291494   | 0.249011 | 6.50E-08 | 7          | Body                |
| cg13134514 | 0.049091   | 0.041099 | 4.14E-07 | 1          | Intergenic          |
| cg13149307 | 0.095053   | 0.110958 | 0.00E+00 | 10         | Body                |
| cg13151266 | 0.161058   | 0.18823  | 0.00E+00 | 20         | Body                |
| cg13157315 | 0.20604    | 0.225908 | 1.78E-07 | 19         | Promoter-associated |
| cg13173255 | 0.810827   | 0.842658 | 3.15E-07 | 8          | Intergenic          |
| cg13174343 | 0.799053   | 0.829926 | 1.40E-08 | 10         | Body                |
| cg13175532 | 0.64813    | 0.605455 | 1.24E-07 | 10         | Body                |
| cg13182541 | 0.142962   | 0.164274 | 5.70E-08 | 2          | Body                |
| cg13194341 | 0.089848   | 0.103275 | 3.65E-07 | 19         | Body                |
| cg13195923 | 0.064384   | 0.052503 | 8.00E-09 | 11         | Body                |
| cg13236679 | 0.133769   | 0.162841 | 9.00E-09 | 6          | Promoter-associated |
| cg13240639 | 0.142627   | 0.161259 | 4.43E-07 | 22         | 5'UTR               |
| cg13242070 | 0.139636   | 0.09975  | 3.41E-07 | 1          | Intergenic          |
| cg13243377 | 0.122165   | 0.139027 | 3.04E-07 | 8          | Body                |
| cg13265914 | 0.19069    | 0.218296 | 2.30E-08 | 8          | Promoter-associated |
| cg13267368 | 0.240851   | 0.199309 | 5.00E-09 | 14         | Promoter-associated |
| cg13269166 | 0.169628   | 0.19468  | 4.99E-07 | 7          | Body                |
| cg13278353 | 0.142071   | 0.102749 | 8.90E-08 | 2          | Intergenic          |
| cg13286318 | 0.122135   | 0.09615  | 2.20E-08 | 8          | Promoter-associated |
| cg13303229 | 0.185435   | 0.213411 | 6.00E-09 | 5          | Body                |
| cg13318121 | 0.22948    | 0.171535 | 2.31E-07 | 8          | Promoter-associated |
| cg13325330 | 0.090465   | 0.065587 | 1.00E-09 | 6          | Promoter-associated |
| cg13326999 | 0.495299   | 0.441838 | 1.70E-08 | X          | Intergenic          |
| cg13338877 | 0.062367   | 0.050322 | 1.06E-07 | 6          | Body                |
| cg13348943 | 0.84586    | 0.867899 | 3.61E-07 | 10         | Intergenic          |
| cg13370280 | 0.127027   | 0.144137 | 3.09E-07 | 6          | Promoter-associated |
| cg13372905 | 0.920288   | 0.930308 | 4.26E-07 | 1          | Body                |
| cg13378789 | 0.856967   | 0.873771 | 4.19E-07 | 11         | Intergenic          |
| cg13379408 | 0.115382   | 0.0922   | 5.20E-08 | 18         | Promoter-associated |
| cg13383572 | 0.836046   | 0.856377 | 8.50E-08 | 12         | Body                |
| cg13391740 | 0.527604   | 0.476869 | 2.00E-09 | 6          | Intergenic          |
| cg13393195 | 0.137545   | 0.15916  | 1.60E-08 | 12         | Body                |
| cg13422008 | 0.06389    | 0.055964 | 8.20E-08 | 3          | Promoter-associated |

| IlluminaID | Maltreated | Control  | p-value  | Chromosome | CpG site location   |
|------------|------------|----------|----------|------------|---------------------|
| cg13430094 | 0.082524   | 0.064326 | 4.45E-07 | 7          | Promoter-associated |
| cg13436155 | 0.13293    | 0.092968 | 1.90E-08 | 13         | Intergenic          |
| cg13436940 | 0.059428   | 0.047084 | 3.48E-07 | 11         | Intergenic          |
| cg13437084 | 0.07818    | 0.050811 | 3.60E-08 | 2          | Body                |
| cg13461950 | 0.444807   | 0.396474 | 4.00E-08 | 2          | Intergenic          |
| cg13467254 | 0.094466   | 0.113401 | 1.22E-07 | 8          | Body                |
| cg13468249 | 0.346755   | 0.261704 | 0.00E+00 | 17         | Body                |
| cg13473196 | 0.060007   | 0.050717 | 4.62E-07 | 11         | 5'UTR               |
| cg13477849 | 0.025733   | 0.020346 | 4.00E-09 | 6          | Promoter-associated |
| cg13484581 | 0.07439    | 0.056434 | 3.39E-07 | 9          | Body                |
| cg13500029 | 0.807566   | 0.742434 | 4.20E-08 | 12         | Body                |
| cg13516087 | 0.167139   | 0.196148 | 1.38E-07 | 12         | Body                |
| cg13537196 | 0.123621   | 0.141233 | 2.73E-07 | 9          | Promoter-associated |
| cg13547551 | 0.115027   | 0.135126 | 2.42E-07 | 9          | Body                |
| cg13552272 | 0.88138    | 0.899383 | 2.00E-09 | 1          | Intergenic          |
| cg13559259 | 0.094735   | 0.067094 | 3.00E-07 | 18         | Body                |
| cg13561339 | 0.835825   | 0.855017 | 2.70E-08 | 22         | Intergenic          |
| cg13565492 | 0.093096   | 0.067674 | 4.00E-09 | 6          | Promoter-associated |
| cg13566059 | 0.55492    | 0.457087 | 1.30E-08 | X          | Body                |
| cg13587997 | 0.587073   | 0.546198 | 1.62E-07 | 19         | Intergenic          |
| cg13602438 | 0.167878   | 0.187552 | 3.27E-07 | 15         | Body                |
| cg13608629 | 0.133519   | 0.151887 | 1.34E-07 | 2          | Intergenic          |
| cg13620615 | 0.074541   | 0.055906 | 9.40E-08 | 21         | Promoter-associated |
| cg13622287 | 0.036041   | 0.029886 | 1.85E-07 | 13         | Body                |
| cg13627451 | 0.123815   | 0.090894 | 3.89E-07 | 15         | Body                |
| cg13634122 | 0.851685   | 0.872913 | 4.21E-07 | 17         | Intergenic          |
| cg13637352 | 0.701435   | 0.67814  | 8.60E-08 | 19         | 3'UTR               |
| cg13662262 | 0.120783   | 0.138693 | 2.00E-08 | 21         | Promoter-associated |
| cg13662634 | 0.193442   | 0.214925 | 2.69E-07 | 9          | Body                |
| cg13670615 | 0.117247   | 0.08792  | 1.50E-08 | 19         | Body                |
| cg13690588 | 0.085968   | 0.068583 | 1.37E-07 | 1          | Promoter-associated |
| cg13694576 | 0.10546    | 0.087642 | 1.41E-07 | 11         | 5'UTR               |
| cg13699414 | 0.098037   | 0.071328 | 4.20E-08 | 5          | Intergenic          |
| cg13699887 | 0.221151   | 0.297893 | 4.72E-07 | 6          | Promoter-associated |
| cg13725958 | 0.126146   | 0.099446 | 9.00E-09 | 17         | 5'UTR               |
| cg13736497 | 0.323205   | 0.397914 | 0.00E+00 | 9          | Intergenic          |
| cg13742182 | 0.108351   | 0.08472  | 1.52E-07 | 4          | Body                |
| cg13752837 | 0.044091   | 0.036835 | 2.00E-09 | 9          | Promoter-associated |
| cg13784889 | 0.12711    | 0.14511  | 3.34E-07 | 4          | Promoter-associated |
| cg13790427 | 0.391124   | 0.346353 | 2.70E-08 | 2          | Intergenic          |
| cg13791713 | 0.391445   | 0.330501 | 0.00E+00 | 21         | Promoter-associated |
| cg13794268 | 0.589763   | 0.641508 | 3.13E-07 | 9          | Intergenic          |
| cg13798721 | 0.036599   | 0.027162 | 1.14E-07 | 14         | Promoter-associated |
| cg13802013 | 0.113565   | 0.096914 | 4.10E-07 | 20         | Intergenic          |
| cg13817410 | 0.1993     | 0.155327 | 3.00E-09 | 9          | Body                |
| cg13819586 | 0.100771   | 0.079435 | 3.81E-07 | 14         | Promoter-associated |
| cg13824734 | 0.105105   | 0.121702 | 3.57E-07 | 17         | Promoter-associated |
| cg13826167 | 0.107071   | 0.082152 | 2.60E-08 | 15         | Body                |
| cg13826264 | 0.566211   | 0.524789 | 1.18E-07 | 9          | Body                |
| cg13829550 | 0.028587   | 0.023107 | 1.26E-07 | 14         | Body                |
| cg13838578 | 0.728488   | 0.676792 | 3.42E-07 | 6          | Intergenic          |
| cg13845951 | 0.813209   | 0.750935 | 5.50E-08 | 2          | Intergenic          |
| cg13849253 | 0.140383   | 0.11091  | 1.08E-07 | 9          | Body                |

| lluminalID | Maltreated | Control  | p-value  | Chromosome | CpG site location   |
|------------|------------|----------|----------|------------|---------------------|
| cg13850344 | 0.13226    | 0.099264 | 6.70E-08 | 12         | Promoter-associated |
| cg13886636 | 0.153037   | 0.121132 | 1.30E-08 | 9          | Promoter-associated |
| cg13911693 | 0.149061   | 0.172067 | 1.98E-07 | 12         | Promoter-associated |
| cg13914486 | 0.689229   | 0.589985 | 4.00E-09 | 10         | Intergenic          |
| cg13919438 | 0.030929   | 0.022467 | 5.80E-08 | 20         | Body                |
| cg13924868 | 0.593048   | 0.551651 | 1.26E-07 | 1          | Body                |
| cg13929079 | 0.121168   | 0.091148 | 1.28E-07 | 12         | Promoter-associated |
| cg13931925 | 0.068167   | 0.051457 | 3.05E-07 | 1          | Body                |
| cg13936061 | 0.914999   | 0.929066 | 2.30E-08 | 7          | Body                |
| cg13942016 | 0.091757   | 0.059277 | 1.30E-08 | 11         | Body                |
| cg13944903 | 0.092987   | 0.05697  | 1.90E-08 | 7          | Promoter-associated |
| cg13951527 | 0.078675   | 0.061923 | 0.00E+00 | 17         | Body                |
| cg13953403 | 0.194484   | 0.147463 | 1.60E-08 | 8          | Promoter-associated |
| cg13964280 | 0.115845   | 0.130412 | 4.74E-07 | 17         | Promoter-associated |
| cg13978100 | 0.10635    | 0.083753 | 5.90E-08 | 9          | Intergenic          |
| cg13980308 | 0.126602   | 0.143564 | 1.21E-07 | 7          | Promoter-associated |
| cg13983922 | 0.800719   | 0.825445 | 1.00E-09 | 4          | Intergenic          |
| cg13990559 | 0.159905   | 0.18003  | 4.39E-07 | 17         | Promoter-associated |
| cg14003794 | 0.267535   | 0.330036 | 3.03E-07 | 21         | Body                |
| cg14012564 | 0.814499   | 0.843163 | 1.03E-07 | 10         | Body                |
| cg14021555 | 0.154357   | 0.170957 | 4.57E-07 | 22         | Promoter-associated |
| cg14022721 | 0.159841   | 0.177276 | 8.00E-08 | 22         | Promoter-associated |
| cg14029663 | 0.392639   | 0.328734 | 5.20E-08 | 14         | Promoter-associated |
| cg14036097 | 0.392111   | 0.344903 | 0.00E+00 | 4          | Body                |
| cg14041100 | 0.02301    | 0.018613 | 1.56E-07 | 8          | Promoter-associated |
| cg14074715 | 0.042062   | 0.033178 | 4.24E-07 | 17         | Body                |
| cg14094333 | 0.298278   | 0.212011 | 2.00E-09 | 4          | Body                |
| cg14095692 | 0.174198   | 0.140054 | 8.60E-08 | 18         | Intergenic          |
| cg14100214 | 0.232754   | 0.204338 | 7.00E-09 | 7          | Intergenic          |
| cg14102251 | 0.134861   | 0.152339 | 1.45E-07 | 14         | Body                |
| cg14122138 | 0.068891   | 0.044585 | 1.59E-07 | 17         | Body                |
| cg14123135 | 0.576941   | 0.5167   | 1.41E-07 | X          | Promoter-associated |
| cg14125707 | 0.380281   | 0.343007 | 1.65E-07 | 9          | Body                |
| cg14129664 | 0.168894   | 0.190221 | 1.57E-07 | 19         | Promoter-associated |
| cg14153494 | 0.19361    | 0.244148 | 4.00E-09 | 17         | Promoter-associated |
| cg14153557 | 0.535979   | 0.502787 | 6.00E-09 | 3          | Intergenic          |
| cg14154532 | 0.038389   | 0.0296   | 5.00E-09 | 19         | Body                |
| cg14170609 | 0.700535   | 0.730251 | 2.00E-09 | 15         | Intergenic          |
| cg14207794 | 0.119459   | 0.140706 | 3.09E-07 | 17         | Promoter-associated |
| cg14211646 | 0.142196   | 0.15876  | 3.14E-07 | 1          | Promoter-associated |
| cg14215088 | 0.313553   | 0.277242 | 2.91E-07 | 9          | Intergenic          |
| cg14220277 | 0.074581   | 0.0576   | 1.50E-08 | 21         | Promoter-associated |
| cg14231674 | 0.233596   | 0.1871   | 7.00E-09 | 9          | Promoter-associated |
| cg14236862 | 0.158614   | 0.122788 | 8.00E-08 | 10         | Promoter-associated |
| cg14242460 | 0.069761   | 0.052894 | 1.58E-07 | 6          | Body                |
| cg14276619 | 0.194965   | 0.217989 | 3.08E-07 | 12         | Body                |
| cg14279842 | 0.046396   | 0.03388  | 1.90E-08 | 14         | Promoter-associated |
| cg14283059 | 0.133096   | 0.151641 | 4.05E-07 | 4          | Promoter-associated |
| cg14289294 | 0.136338   | 0.11653  | 2.00E-08 | 11         | Body                |
| cg14305454 | 0.127862   | 0.089493 | 5.90E-08 | 14         | 5'UTR               |
| cg14328457 | 0.100969   | 0.081071 | 1.41E-07 | 17         | Body                |
| cg14334911 | 0.025937   | 0.021735 | 4.90E-08 | 17         | Intergenic          |
| cg14349549 | 0.1809     | 0.237761 | 1.07E-07 | 7          | Intergenic          |

| lluminalID | Maltreated | Control  | p-value  | Chromosome | CpG site location   |
|------------|------------|----------|----------|------------|---------------------|
| cg14358474 | 0.446444   | 0.414648 | 1.17E-07 | 9          | Promoter-associated |
| cg14364739 | 0.082237   | 0.098469 | 6.30E-08 | 19         | Promoter-associated |
| cg14371649 | 0.731865   | 0.772469 | 4.95E-07 | 9          | Body                |
| cg14375754 | 0.028732   | 0.02247  | 1.26E-07 | 1          | Promoter-associated |
| cg14383828 | 0.102065   | 0.074123 | 1.19E-07 | 9          | Intergenic          |
| cg14414971 | 0.033654   | 0.025226 | 4.85E-07 | 7          | Body                |
| cg14417676 | 0.224692   | 0.155163 | 2.00E-09 | 2          | Body                |
| cg14419581 | 0.053591   | 0.043435 | 3.94E-07 | 17         | Body                |
| cg14420245 | 0.379527   | 0.431808 | 1.78E-07 | 2          | Body                |
| cg14448169 | 0.122693   | 0.093317 | 1.90E-08 | 7          | Body                |
| cg14462779 | 0.328439   | 0.239964 | 6.40E-08 | 10         | Body                |
| cg14470762 | 0.825802   | 0.731223 | 1.51E-07 | 9          | Body                |
| cg14487292 | 0.091875   | 0.068459 | 2.38E-07 | 17         | Body                |
| cg14491479 | 0.099753   | 0.075095 | 5.00E-09 | 8          | Promoter-associated |
| cg14496193 | 0.116721   | 0.131938 | 4.00E-09 | 22         | Promoter-associated |
| cg14498592 | 0.763125   | 0.655344 | 2.57E-07 | 20         | Body                |
| cg14511644 | 0.381293   | 0.313955 | 4.00E-09 | 9          | Intergenic          |
| cg14516552 | 0.071161   | 0.053074 | 4.80E-08 | 9          | Body                |
| cg14519123 | 0.093779   | 0.073368 | 3.56E-07 | 15         | 5'UTR               |
| cg14527148 | 0.058899   | 0.043449 | 0.00E+00 | 15         | Promoter-associated |
| cg14529754 | 0.434181   | 0.396493 | 5.10E-08 | 3          | Promoter-associated |
| cg14534967 | 0.100993   | 0.112582 | 3.52E-07 | 7          | Body                |
| cg14538320 | 0.067514   | 0.052651 | 4.10E-08 | 8          | Body                |
| cg14544632 | 0.784447   | 0.807063 | 6.00E-09 | 11         | Intergenic          |
| cg14544983 | 0.014297   | 0.011975 | 3.87E-07 | 19         | Body                |
| cg14546197 | 0.110239   | 0.082401 | 2.66E-07 | 17         | Promoter-associated |
| cg14551186 | 0.313949   | 0.245598 | 2.00E-09 | 9          | Body                |
| cg14564046 | 0.052098   | 0.037691 | 4.80E-07 | 17         | Promoter-associated |
| cg14573897 | 0.586764   | 0.650278 | 1.56E-07 | 19         | Body                |
| cg14576681 | 0.132216   | 0.152483 | 1.82E-07 | 2          | Promoter-associated |
| cg14591386 | 0.09676    | 0.076979 | 9.60E-08 | 6          | Promoter-associated |
| cg14593956 | 0.073265   | 0.057148 | 3.90E-07 | 5          | Promoter-associated |
| cg14597223 | 0.037642   | 0.029871 | 2.06E-07 | 7          | Body                |
| cg14601560 | 0.151006   | 0.167585 | 4.61E-07 | 2          | Body                |
| cg14615609 | 0.679333   | 0.65464  | 1.00E-08 | 6          | Body                |
| cg14655249 | 0.115202   | 0.131688 | 4.75E-07 | 9          | Body                |
| cg14658518 | 0.719586   | 0.753433 | 0.00E+00 | 10         | Intergenic          |
| cg14661225 | 0.266227   | 0.22484  | 1.40E-08 | 19         | Body                |
| cg14688588 | 0.283162   | 0.229535 | 1.40E-08 | 3          | Body                |
| cg14689490 | 0.784849   | 0.810571 | 4.00E-07 | 7          | Body                |
| cg14704270 | 0.095366   | 0.073871 | 1.51E-07 | 22         | Body                |
| cg14707231 | 0.202438   | 0.251022 | 3.31E-07 | 5          | Intergenic          |
| cg14711201 | 0.087151   | 0.103458 | 2.40E-08 | 5          | Body                |
| cg14728310 | 0.113507   | 0.090908 | 1.17E-07 | 19         | Promoter-associated |
| cg14734614 | 0.695873   | 0.745548 | 2.78E-07 | 19         | Body                |
| cg14735242 | 0.074699   | 0.086711 | 4.10E-08 | 2          | Promoter-associated |
| cg14737592 | 0.155255   | 0.170935 | 3.18E-07 | 12         | Promoter-associated |
| cg14749448 | 0.317228   | 0.241749 | 3.00E-09 | 11         | Body                |
| cg14774160 | 0.183688   | 0.162089 | 2.00E-09 | 17         | Body                |
| cg14774438 | 0.180346   | 0.114165 | 3.76E-07 | 11         | Body                |
| cg14785579 | 0.905382   | 0.916255 | 3.19E-07 | 18         | Intergenic          |
| cg14790772 | 0.119279   | 0.090721 | 3.00E-09 | 1          | Promoter-associated |
| cg14793819 | 0.03161    | 0.024266 | 1.20E-08 | 3          | Body                |



| lluminaID  | Maltreated | Control  | p-value  | Chromosome | CpG site location   |
|------------|------------|----------|----------|------------|---------------------|
| cg14806867 | 0.179591   | 0.13308  | 1.00E-09 | 13         | Promoter-associated |
| cg14810013 | 0.103961   | 0.082093 | 0.00E+00 | 4          | Body                |
| cg14825729 | 0.175692   | 0.127591 | 4.18E-07 | 4          | 5'UTR               |
| cg14837800 | 0.17853    | 0.206162 | 7.00E-09 | 2          | Promoter-associated |
| cg14844588 | 0.110232   | 0.079345 | 0.00E+00 | 1          | Body                |
| cg14848555 | 0.130552   | 0.112689 | 2.00E-09 | 1          | 5'UTR               |
| cg14848832 | 0.124081   | 0.144693 | 1.57E-07 | 1          | Promoter-associated |
| cg14864852 | 0.031522   | 0.027045 | 1.94E-07 | 22         | Promoter-associated |
| cg14875093 | 0.171986   | 0.19358  | 3.00E-09 | 19         | Body                |
| cg14908964 | 0.523092   | 0.454787 | 0.00E+00 | 11         | 5'UTR               |
| cg14928532 | 0.093973   | 0.110478 | 7.00E-09 | 9          | Promoter-associated |
| cg14933365 | 0.575203   | 0.531705 | 5.00E-09 | 19         | Body                |
| cg14941559 | 0.834945   | 0.801099 | 2.10E-08 | 3          | 5'UTR               |
| cg14942134 | 0.04798    | 0.033028 | 4.70E-08 | 8          | Body                |
| cg14942464 | 0.168552   | 0.230964 | 1.27E-07 | 14         | 3'UTR               |
| cg14956886 | 0.146378   | 0.165149 | 9.30E-08 | 4          | Promoter-associated |
| cg14965968 | 0.062923   | 0.042983 | 4.74E-07 | 3          | Body                |
| cg14984257 | 0.46702    | 0.394781 | 1.89E-07 | 2          | Promoter-associated |
| cg14993712 | 0.055221   | 0.047137 | 3.18E-07 | 7          | Promoter-associated |
| cg15010390 | 0.092882   | 0.111327 | 3.64E-07 | 4          | Promoter-associated |
| cg15013019 | 0.117162   | 0.136267 | 7.00E-09 | 19         | Promoter-associated |
| cg15013982 | 0.864421   | 0.886781 | 1.00E-09 | 11         | Body                |
| cg15017004 | 0.075088   | 0.057937 | 1.09E-07 | 18         | Promoter-associated |
| cg15017982 | 0.560162   | 0.616686 | 7.20E-08 | 11         | Body                |
| cg15024055 | 0.117348   | 0.134582 | 1.09E-07 | 5          | Body                |
| cg15027295 | 0.781728   | 0.813914 | 1.00E-09 | 6          | Intergenic          |
| cg15047484 | 0.714332   | 0.746494 | 0.00E+00 | 4          | Intergenic          |
| cg15073462 | 0.145372   | 0.11189  | 4.08E-07 | 3          | Intergenic          |
| cg15084499 | 0.103063   | 0.080216 | 2.62E-07 | 1          | Body                |
| cg15094119 | 0.790791   | 0.810132 | 3.03E-07 | 7          | Body                |
| cg15094912 | 0.116131   | 0.132051 | 1.13E-07 | 21         | Body                |
| cg15101980 | 0.153033   | 0.136038 | 1.30E-08 | 5          | Body                |
| cg15108590 | 0.082489   | 0.054378 | 2.32E-07 | 21         | 5'UTR               |
| cg15120754 | 0.059943   | 0.044386 | 3.31E-07 | 2          | Body                |
| cg15125757 | 0.120197   | 0.134908 | 2.52E-07 | 6          | Promoter-associated |
| cg15128347 | 0.726791   | 0.75486  | 6.70E-08 | 10         | Intergenic          |
| cg15192120 | 0.862773   | 0.877837 | 1.02E-07 | 7          | Body                |
| cg15214172 | 0.302767   | 0.369209 | 6.00E-09 | 7          | 5'UTR               |
| cg15229027 | 0.161835   | 0.178413 | 8.40E-08 | 14         | Promoter-associated |
| cg15239263 | 0.149638   | 0.173753 | 3.00E-07 | 16         | Body                |
| cg15247031 | 0.441908   | 0.399766 | 4.63E-07 | 14         | Promoter-associated |
| cg15254786 | 0.17188    | 0.192779 | 4.18E-07 | 2          | Body                |
| cg15278734 | 0.083901   | 0.07163  | 4.00E-09 | 4          | Body                |
| cg15279476 | 0.100882   | 0.080931 | 4.03E-07 | 10         | Body                |
| cg15287092 | 0.049389   | 0.037114 | 2.12E-07 | 3          | Promoter-associated |
| cg15302530 | 0.111874   | 0.071953 | 0.00E+00 | 7          | Body                |
| cg15310871 | 0.876242   | 0.837072 | 2.68E-07 | 8          | 3'UTR               |
| cg15311382 | 0.102854   | 0.079356 | 3.66E-07 | 11         | Intergenic          |
| cg15312192 | 0.829818   | 0.85987  | 6.50E-08 | 3          | Intergenic          |
| cg15330117 | 0.026853   | 0.019813 | 2.90E-08 | 10         | 5'UTR               |
| cg15333674 | 0.433737   | 0.370785 | 3.20E-08 | 22         | Intergenic          |
| cg15338041 | 0.769989   | 0.813165 | 2.00E-09 | 3          | Body                |
| cg15342139 | 0.066735   | 0.044135 | 3.56E-07 | 6          | Body                |

| lluminalID | Maltreated | Control  | p-value  | Chromosome | CpG site location   |
|------------|------------|----------|----------|------------|---------------------|
| cg15342384 | 0.107958   | 0.121973 | 2.05E-07 | 10         | 5'UTR               |
| cg15343101 | 0.110445   | 0.125011 | 2.51E-07 | 19         | Promoter-associated |
| cg15344021 | 0.142575   | 0.161677 | 2.90E-08 | 17         | 5'UTR               |
| cg15356674 | 0.18224    | 0.205814 | 0.00E+00 | 10         | Intergenic          |
| cg15363487 | 0.269548   | 0.249698 | 3.70E-08 | 10         | Promoter-associated |
| cg15372009 | 0.54628    | 0.508796 | 2.04E-07 | 4          | Intergenic          |
| cg15379185 | 0.043307   | 0.031024 | 1.20E-07 | 7          | Body                |
| cg15400593 | 0.669672   | 0.636765 | 5.30E-08 | 5          | Body                |
| cg15404858 | 0.061184   | 0.05034  | 4.98E-07 | 20         | Body                |
| cg15410253 | 0.051107   | 0.039343 | 4.09E-07 | 19         | 5'UTR               |
| cg15413566 | 0.097992   | 0.076212 | 3.90E-07 | 7          | Body                |
| cg15418297 | 0.190338   | 0.216419 | 2.70E-08 | 8          | Body                |
| cg15421363 | 0.113801   | 0.089072 | 6.80E-08 | 5          | Promoter-associated |
| cg15427656 | 0.152982   | 0.181386 | 3.30E-07 | 10         | Body                |
| cg15441006 | 0.710529   | 0.646171 | 2.82E-07 | 4          | Body                |
| cg15442610 | 0.05904    | 0.044819 | 7.80E-08 | 19         | Promoter-associated |
| cg15446613 | 0.421219   | 0.358434 | 1.47E-07 | 6          | Promoter-associated |
| cg15450734 | 0.160273   | 0.178497 | 3.28E-07 | 14         | Intergenic          |
| cg15453778 | 0.496735   | 0.563843 | 1.36E-07 | 13         | Intergenic          |
| cg15459742 | 0.117978   | 0.136271 | 1.00E-09 | 9          | Body                |
| cg15461335 | 0.134157   | 0.156369 | 2.54E-07 | 13         | Body                |
| cg15462501 | 0.233971   | 0.288808 | 2.27E-07 | 22         | Intergenic          |
| cg15484532 | 0.049891   | 0.03553  | 9.40E-08 | 1          | Body                |
| cg15486233 | 0.300311   | 0.220109 | 3.40E-08 | 10         | 5'UTR               |
| cg15489005 | 0.13429    | 0.107039 | 5.00E-09 | 1          | Intergenic          |
| cg15498283 | 0.094272   | 0.080519 | 1.43E-07 | 11         | Promoter-associated |
| cg15512835 | 0.133672   | 0.152023 | 4.00E-09 | 1          | Body                |
| cg15520863 | 0.386574   | 0.335554 | 1.49E-07 | X          | 5'UTR               |
| cg15540553 | 0.070599   | 0.046951 | 3.58E-07 | 11         | Promoter-associated |
| cg15543045 | 0.157432   | 0.126168 | 2.98E-07 | 4          | Body                |
| cg15550654 | 0.775101   | 0.808743 | 7.30E-08 | 22         | Body                |
| cg15617548 | 0.261463   | 0.166928 | 0.00E+00 | 2          | Promoter-associated |
| cg15623175 | 0.133959   | 0.099576 | 2.43E-07 | 8          | Intergenic          |
| cg15637484 | 0.086049   | 0.097969 | 2.23E-07 | 5          | Body                |
| cg15641340 | 0.820783   | 0.848594 | 4.20E-08 | 6          | Body                |
| cg15645344 | 0.69934    | 0.739179 | 4.02E-07 | 4          | Intergenic          |
| cg15661671 | 0.370752   | 0.316754 | 2.06E-07 | X          | Promoter-associated |
| cg15664069 | 0.057366   | 0.045484 | 1.00E-08 | 6          | Promoter-associated |
| cg15672331 | 0.054153   | 0.041332 | 5.20E-08 | 15         | Promoter-associated |
| cg15688767 | 0.092438   | 0.109515 | 3.76E-07 | 3          | 5'UTR               |
| cg15693898 | 0.270566   | 0.205931 | 5.30E-08 | 3          | Promoter-associated |
| cg15696408 | 0.255669   | 0.207722 | 4.00E-09 | 7          | Promoter-associated |
| cg15719025 | 0.285853   | 0.342741 | 3.83E-07 | 1          | Promoter-associated |
| cg15721666 | 0.317488   | 0.277748 | 1.40E-08 | 12         | Body                |
| cg15722265 | 0.813046   | 0.855081 | 2.00E-09 | 1          | Intergenic          |
| cg15730116 | 0.062179   | 0.044556 | 1.99E-07 | 12         | Promoter-associated |
| cg15735483 | 0.819109   | 0.720106 | 2.06E-07 | X          | Body                |
| cg15785704 | 0.115861   | 0.136014 | 1.13E-07 | 17         | Promoter-associated |
| cg15790214 | 0.187878   | 0.148411 | 2.40E-08 | 6          | Body                |
| cg15792158 | 0.136618   | 0.101865 | 2.70E-07 | 12         | Promoter-associated |
| cg15794859 | 0.109932   | 0.087045 | 2.48E-07 | 6          | 3'UTR               |
| cg15823729 | 0.866354   | 0.882322 | 2.17E-07 | 1          | Intergenic          |
| cg15839482 | 0.495833   | 0.445758 | 2.30E-08 | 7          | Promoter-associated |

| lluminalID | Maltreated | Control  | p-value  | Chromosome | CpG site location   |
|------------|------------|----------|----------|------------|---------------------|
| cg15847400 | 0.086902   | 0.072612 | 4.08E-07 | 6          | Body                |
| cg15847565 | 0.03573    | 0.029986 | 7.70E-08 | 4          | Body                |
| cg15853374 | 0.126775   | 0.145735 | 6.90E-08 | 22         | Promoter-associated |
| cg15883201 | 0.271621   | 0.230341 | 2.20E-08 | X          | Body                |
| cg15888301 | 0.206263   | 0.160076 | 7.00E-09 | 15         | Body                |
| cg15904130 | 0.918854   | 0.935067 | 1.00E-09 | 11         | Body                |
| cg15920017 | 0.049374   | 0.03939  | 1.60E-08 | 6          | Promoter-associated |
| cg15921587 | 0.146171   | 0.096708 | 1.10E-07 | 2          | Body                |
| cg15941164 | 0.035439   | 0.023814 | 0.00E+00 | 5          | Promoter-associated |
| cg15950068 | 0.105359   | 0.078699 | 1.23E-07 | 6          | Body                |
| cg15953310 | 0.219426   | 0.191671 | 2.90E-08 | X          | Intergenic          |
| cg15965583 | 0.215897   | 0.158238 | 3.18E-07 | 1          | Body                |
| cg15993354 | 0.203288   | 0.168638 | 4.40E-08 | 19         | 5'UTR               |
| cg15994267 | 0.416271   | 0.370393 | 1.00E-09 | 1          | Body                |
| cg16015031 | 0.184378   | 0.22492  | 2.77E-07 | 6          | Promoter-associated |
| cg16021909 | 0.071313   | 0.053716 | 1.00E-09 | 1          | Body                |
| cg16035024 | 0.755229   | 0.721121 | 1.30E-08 | 7          | Body                |
| cg16036305 | 0.052682   | 0.042429 | 2.52E-07 | 1          | Body                |
| cg16043190 | 0.140789   | 0.162088 | 1.59E-07 | 4          | Promoter-associated |
| cg16045612 | 0.121178   | 0.138923 | 9.00E-08 | 5          | Body                |
| cg16051027 | 0.09101    | 0.105583 | 7.70E-08 | 20         | Promoter-associated |
| cg16063747 | 0.038538   | 0.02977  | 2.40E-08 | 10         | Body                |
| cg16088539 | 0.03383    | 0.020433 | 4.00E-09 | 6          | Intergenic          |
| cg16092991 | 0.173024   | 0.195633 | 4.26E-07 | 4          | Body                |
| cg16103098 | 0.813894   | 0.705021 | 3.21E-07 | 14         | Body                |
| cg16136038 | 0.045339   | 0.036644 | 2.00E-08 | 12         | Promoter-associated |
| cg16136385 | 0.341156   | 0.286106 | 7.10E-08 | 11         | 5'UTR               |
| cg16136957 | 0.1237     | 0.142581 | 1.51E-07 | 3          | Promoter-associated |
| cg16162018 | 0.868693   | 0.898947 | 2.42E-07 | 20         | Body                |
| cg16172814 | 0.058126   | 0.043549 | 2.01E-07 | 10         | Body                |
| cg16184818 | 0.818781   | 0.836368 | 2.00E-09 | 12         | Body                |
| cg16192916 | 0.154362   | 0.179466 | 3.10E-08 | 2          | Body                |
| cg16199850 | 0.516374   | 0.461103 | 2.20E-08 | X          | Body                |
| cg16205163 | 0.73569    | 0.708351 | 1.69E-07 | 17         | Body                |
| cg16224018 | 0.373168   | 0.327156 | 6.90E-08 | 12         | Promoter-associated |
| cg16236688 | 0.808945   | 0.82732  | 4.62E-07 | 10         | Intergenic          |
| cg16239906 | 0.105249   | 0.120316 | 2.76E-07 | 20         | Promoter-associated |
| cg16241218 | 0.026424   | 0.021005 | 1.34E-07 | 3          | Body                |
| cg16242888 | 0.145165   | 0.168998 | 7.70E-08 | 9          | 5'UTR               |
| cg16265552 | 0.100978   | 0.11408  | 1.49E-07 | 3          | Promoter-associated |
| cg16275894 | 0.673199   | 0.725529 | 2.07E-07 | 17         | Body                |
| cg16286157 | 0.750462   | 0.779992 | 9.50E-08 | 8          | Intergenic          |
| cg16294016 | 0.08383    | 0.059446 | 9.00E-09 | 4          | Body                |
| cg16294310 | 0.142038   | 0.164668 | 2.22E-07 | 22         | Promoter-associated |
| cg16306381 | 0.13761    | 0.157187 | 2.50E-08 | 17         | 5'UTR               |
| cg16309595 | 0.141146   | 0.108436 | 2.00E-07 | 12         | Intergenic          |
| cg16326134 | 0.115774   | 0.138602 | 1.76E-07 | 7          | Body                |
| cg16328462 | 0.840255   | 0.868279 | 3.07E-07 | 8          | Intergenic          |
| cg16333535 | 0.203908   | 0.232238 | 1.30E-08 | 22         | Promoter-associated |
| cg16349006 | 0.033956   | 0.024568 | 8.90E-08 | 20         | Promoter-associated |
| cg16362480 | 0.281978   | 0.217801 | 1.00E-09 | 16         | 5'UTR               |
| cg16365973 | 0.432986   | 0.35612  | 5.60E-08 | 1          | Promoter-associated |
| cg16376036 | 0.118982   | 0.074956 | 4.00E-09 | 11         | Promoter-associated |

| lluminalID | Maltreated | Control  | p-value  | Chromosome | CpG site location   |
|------------|------------|----------|----------|------------|---------------------|
| cg16392193 | 0.761485   | 0.787446 | 1.80E-08 | 5          | 3'UTR               |
| cg16402443 | 0.259682   | 0.215653 | 0.00E+00 | 7          | Body                |
| cg16402894 | 0.179284   | 0.200927 | 1.24E-07 | 11         | Promoter-associated |
| cg16406226 | 0.077688   | 0.053476 | 1.02E-07 | 20         | Promoter-associated |
| cg16416718 | 0.161289   | 0.143182 | 1.60E-07 | 1          | Promoter-associated |
| cg16418735 | 0.103417   | 0.119502 | 2.10E-07 | 3          | Promoter-associated |
| cg16419235 | 0.080648   | 0.063932 | 1.29E-07 | 8          | Body                |
| cg16437896 | 0.491484   | 0.435992 | 0.00E+00 | 6          | Promoter-associated |
| cg16465643 | 0.852734   | 0.877292 | 1.94E-07 | 6          | Intergenic          |
| cg16470957 | 0.208857   | 0.235476 | 3.00E-09 | 3          | Promoter-associated |
| cg16479539 | 0.037827   | 0.027927 | 2.92E-07 | 12         | Intergenic          |
| cg16497921 | 0.161736   | 0.180756 | 3.17E-07 | 11         | Body                |
| cg16510409 | 0.159823   | 0.138921 | 4.65E-07 | 19         | Body                |
| cg16529440 | 0.053906   | 0.03798  | 1.00E-08 | 12         | Promoter-associated |
| cg16531660 | 0.035837   | 0.026964 | 5.00E-09 | 3          | 5'UTR               |
| cg16531718 | 0.57101    | 0.543229 | 1.00E-09 | 3          | Promoter-associated |
| cg16539272 | 0.373919   | 0.436857 | 3.00E-09 | 10         | Body                |
| cg16540026 | 0.062517   | 0.05146  | 3.48E-07 | 11         | Body                |
| cg16589843 | 0.813259   | 0.697522 | 1.68E-07 | 1          | 3'UTR               |
| cg16627807 | 0.101003   | 0.116298 | 1.20E-08 | 19         | 5'UTR               |
| cg16631025 | 0.02606    | 0.021114 | 3.79E-07 | 10         | 5'UTR               |
| cg16642791 | 0.147605   | 0.10947  | 4.28E-07 | 16         | Body                |
| cg16644647 | 0.625279   | 0.589189 | 1.42E-07 | 19         | Body                |
| cg16657924 | 0.068312   | 0.056475 | 7.30E-08 | 10         | Body                |
| cg16682225 | 0.327299   | 0.411687 | 9.70E-08 | 1          | Intergenic          |
| cg16697004 | 0.803545   | 0.847048 | 3.00E-09 | 7          | Intergenic          |
| cg16697853 | 0.030912   | 0.023169 | 8.10E-08 | 11         | Intergenic          |
| cg16700904 | 0.662863   | 0.627124 | 4.00E-09 | 6          | 5'UTR               |
| cg16704464 | 0.265944   | 0.215051 | 3.64E-07 | 19         | Promoter-associated |
| cg16715129 | 0.212284   | 0.163226 | 1.00E-07 | 11         | 5'UTR               |
| cg16717713 | 0.076347   | 0.048195 | 1.00E-09 | 14         | Body                |
| cg16730386 | 0.533485   | 0.466675 | 3.63E-07 | 1          | Body                |
| cg16733705 | 0.075168   | 0.054038 | 6.00E-09 | 12         | Intergenic          |
| cg16753670 | 0.815811   | 0.840491 | 2.58E-07 | 21         | Body                |
| cg16783819 | 0.026678   | 0.021597 | 4.21E-07 | 6          | 5'UTR               |
| cg16819369 | 0.169541   | 0.192303 | 1.75E-07 | 2          | Body                |
| cg16829640 | 0.42615    | 0.318688 | 0.00E+00 | X          | Body                |
| cg16836355 | 0.123729   | 0.143129 | 8.20E-08 | 15         | Intergenic          |
| cg16841327 | 0.042573   | 0.031743 | 7.40E-08 | 22         | Intergenic          |
| cg16861959 | 0.53268    | 0.487307 | 1.90E-08 | 3          | Body                |
| cg16927040 | 0.053628   | 0.041048 | 2.77E-07 | 3          | Body                |
| cg16932514 | 0.751149   | 0.783061 | 4.40E-07 | 20         | Intergenic          |
| cg16937126 | 0.114984   | 0.129208 | 4.46E-07 | 8          | Body                |
| cg16938363 | 0.050292   | 0.034845 | 1.08E-07 | 6          | Intergenic          |
| cg16953577 | 0.139085   | 0.158028 | 2.55E-07 | 4          | Promoter-associated |
| cg16974379 | 0.111162   | 0.129444 | 9.00E-08 | 10         | Promoter-associated |
| cg16975587 | 0.064422   | 0.04354  | 2.50E-08 | 3          | Body                |
| cg16989117 | 0.22257    | 0.172353 | 0.00E+00 | 1          | Promoter-associated |
| cg16998327 | 0.04887    | 0.027928 | 1.02E-07 | 1          | Body                |
| cg16999568 | 0.460852   | 0.425701 | 1.30E-07 | 11         | Intergenic          |
| cg17028039 | 0.131418   | 0.148613 | 1.58E-07 | 10         | Body                |
| cg17043651 | 0.860164   | 0.879687 | 6.60E-08 | 11         | 5'UTR               |
| cg17054285 | 0.10314    | 0.116993 | 3.96E-07 | 20         | Body                |

| lluminalID | Maltreated | Control  | p-value  | Chromosome | CpG site location   |
|------------|------------|----------|----------|------------|---------------------|
| cg17059575 | 0.021287   | 0.016454 | 3.00E-09 | 17         | 5'UTR               |
| cg17078326 | 0.841115   | 0.880045 | 2.70E-08 | 4          | Body                |
| cg17094927 | 0.140515   | 0.106336 | 1.00E-09 | 1          | Promoter-associated |
| cg17101778 | 0.125638   | 0.143086 | 9.70E-08 | 16         | Body                |
| cg17121955 | 0.060143   | 0.041386 | 3.89E-07 | 11         | Body                |
| cg17125688 | 0.251464   | 0.173874 | 5.30E-08 | 2          | Body                |
| cg17134890 | 0.25347    | 0.331354 | 3.94E-07 | 11         | Promoter-associated |
| cg17137035 | 0.027925   | 0.021467 | 4.23E-07 | 19         | Body                |
| cg17138298 | 0.875016   | 0.888412 | 2.70E-08 | 12         | Body                |
| cg17146127 | 0.467598   | 0.424032 | 2.30E-08 | 2          | Intergenic          |
| cg17146997 | 0.900718   | 0.883978 | 8.00E-09 | 6          | Body                |
| cg17176978 | 0.681342   | 0.649138 | 3.00E-09 | 15         | Body                |
| cg17177995 | 0.30539    | 0.237073 | 2.05E-07 | 1          | Intergenic          |
| cg17178919 | 0.028792   | 0.023115 | 3.82E-07 | 3          | Body                |
| cg17182302 | 0.057284   | 0.035466 | 1.43E-07 | 1          | Body                |
| cg17187048 | 0.102858   | 0.121269 | 1.53E-07 | 2          | Body                |
| cg17215449 | 0.042804   | 0.032923 | 1.50E-08 | 22         | Body                |
| cg17240885 | 0.483173   | 0.438706 | 0.00E+00 | 1          | Promoter-associated |
| cg17261804 | 0.339517   | 0.376028 | 1.57E-07 | 11         | Body                |
| cg17274357 | 0.832421   | 0.868827 | 0.00E+00 | 22         | 3'UTR               |
| cg17286253 | 0.125433   | 0.144759 | 4.00E-09 | 1          | Body                |
| cg17298666 | 0.11219    | 0.130618 | 1.05E-07 | 18         | Body                |
| cg17305128 | 0.825296   | 0.790011 | 8.00E-08 | 12         | Body                |
| cg17308661 | 0.156027   | 0.129165 | 4.96E-07 | 14         | Promoter-associated |
| cg17322396 | 0.784652   | 0.808857 | 2.00E-09 | 8          | Intergenic          |
| cg17334970 | 0.767356   | 0.810739 | 1.91E-07 | 6          | 3'UTR               |
| cg17335237 | 0.135984   | 0.152975 | 3.53E-07 | 19         | Promoter-associated |
| cg17357698 | 0.300737   | 0.251943 | 4.00E-09 | 6          | Intergenic          |
| cg17367367 | 0.70594    | 0.637349 | 4.80E-08 | 4          | Intergenic          |
| cg17373332 | 0.911904   | 0.923703 | 1.06E-07 | 3          | Body                |
| cg17374227 | 0.11019    | 0.12438  | 3.28E-07 | 4          | Promoter-associated |
| cg17388172 | 0.880347   | 0.900224 | 0.00E+00 | 12         | 5'UTR               |
| cg17393568 | 0.168064   | 0.122361 | 0.00E+00 | 4          | Body                |
| cg17417198 | 0.106034   | 0.080624 | 3.70E-08 | 5          | Promoter-associated |
| cg17420288 | 0.155057   | 0.17393  | 4.42E-07 | 9          | Body                |
| cg17424859 | 0.83929    | 0.886319 | 3.06E-07 | 6          | Intergenic          |
| cg17436946 | 0.164604   | 0.127297 | 1.30E-08 | 4          | Body                |
| cg17444479 | 0.79324    | 0.674498 | 4.78E-07 | 10         | Body                |
| cg17465697 | 0.054825   | 0.041863 | 5.60E-08 | 1          | Promoter-associated |
| cg17480669 | 0.196778   | 0.124642 | 0.00E+00 | 5          | Promoter-associated |
| cg17518931 | 0.051856   | 0.040587 | 4.54E-07 | 11         | Body                |
| cg17524854 | 0.128028   | 0.142679 | 1.12E-07 | 12         | Promoter-associated |
| cg17539315 | 0.148125   | 0.169317 | 1.00E-09 | 12         | Body                |
| cg17545383 | 0.103739   | 0.116783 | 3.21E-07 | 3          | Promoter-associated |
| cg17576288 | 0.027055   | 0.019093 | 1.90E-08 | 13         | Body                |
| cg17582259 | 0.166785   | 0.183566 | 4.90E-08 | 17         | Body                |
| cg17589437 | 0.151854   | 0.119428 | 7.80E-08 | 7          | Body                |
| cg17590499 | 0.904523   | 0.917182 | 2.73E-07 | 7          | Intergenic          |
| cg17592292 | 0.159158   | 0.179009 | 2.44E-07 | 4          | Body                |
| cg17598334 | 0.191703   | 0.248711 | 2.98E-07 | 2          | Promoter-associated |
| cg17603689 | 0.31332    | 0.234233 | 4.40E-08 | 1          | Intergenic          |
| cg17622922 | 0.159212   | 0.134034 | 0.00E+00 | 11         | Body                |
| cg17635953 | 0.100385   | 0.116635 | 3.03E-07 | 13         | Intergenic          |

| IlluminaID | Maltreated | Control  | p-value  | Chromosome | CpG site location   |
|------------|------------|----------|----------|------------|---------------------|
| cg17639046 | 0.12041    | 0.138635 | 9.90E-08 | 17         | Body                |
| cg17642796 | 0.477931   | 0.399495 | 2.11E-07 | 7          | Intergenic          |
| cg17653784 | 0.055392   | 0.045623 | 3.80E-08 | 12         | Promoter-associated |
| cg17659271 | 0.610158   | 0.64852  | 3.52E-07 | 7          | Body                |
| cg17667988 | 0.133987   | 0.109524 | 1.22E-07 | 19         | Body                |
| cg17669412 | 0.668643   | 0.698135 | 2.00E-09 | 20         | Intergenic          |
| cg17675882 | 0.221096   | 0.247319 | 1.50E-08 | 20         | Promoter-associated |
| cg17682704 | 0.113842   | 0.135943 | 2.40E-08 | 4          | Body                |
| cg17689799 | 0.096226   | 0.068907 | 3.68E-07 | 2          | 3'UTR               |
| cg17693270 | 0.473796   | 0.522321 | 1.77E-07 | X          | Body                |
| cg17694795 | 0.084383   | 0.067614 | 1.00E-07 | 8          | Intergenic          |
| cg17697381 | 0.084833   | 0.062656 | 3.60E-08 | 3          | Promoter-associated |
| cg17717010 | 0.050931   | 0.040933 | 4.78E-07 | 17         | Intergenic          |
| cg17744158 | 0.048753   | 0.037451 | 1.69E-07 | 15         | 5'UTR               |
| cg17752089 | 0.903699   | 0.917175 | 2.00E-09 | 19         | 5'UTR               |
| cg17780246 | 0.110078   | 0.081792 | 1.50E-08 | 19         | Body                |
| cg17780624 | 0.057388   | 0.049633 | 4.40E-08 | 2          | Body                |
| cg17788587 | 0.81106    | 0.856419 | 0.00E+00 | 5          | Body                |
| cg17791867 | 0.130067   | 0.147386 | 1.85E-07 | 7          | Promoter-associated |
| cg17796010 | 0.146217   | 0.107078 | 3.00E-09 | 20         | Body                |
| cg17818308 | 0.122706   | 0.140502 | 9.00E-09 | 2          | Body                |
| cg17818798 | 0.118338   | 0.092398 | 2.60E-07 | 19         | Promoter-associated |
| cg17838705 | 0.075051   | 0.049909 | 1.73E-07 | 1          | Promoter-associated |
| cg17840061 | 0.067278   | 0.044547 | 3.09E-07 | 6          | Promoter-associated |
| cg17841099 | 0.171868   | 0.134509 | 0.00E+00 | 1          | Body                |
| cg17861791 | 0.118094   | 0.090298 | 1.62E-07 | 1          | Body                |
| cg17866734 | 0.156331   | 0.180832 | 2.10E-08 | 6          | Body                |
| cg17868994 | 0.10007    | 0.115211 | 9.10E-08 | 9          | Promoter-associated |
| cg17873910 | 0.176695   | 0.195068 | 3.92E-07 | 2          | Body                |
| cg17882544 | 0.761089   | 0.700062 | 2.95E-07 | 1          | Intergenic          |
| cg17888979 | 0.239222   | 0.191148 | 7.00E-09 | 7          | Body                |
| cg17895522 | 0.393688   | 0.349301 | 0.00E+00 | 10         | Intergenic          |
| cg17902858 | 0.15991    | 0.180425 | 3.77E-07 | 9          | Body                |
| cg17908719 | 0.68069    | 0.736181 | 0.00E+00 | 3          | Intergenic          |
| cg17930852 | 0.255949   | 0.296282 | 2.50E-08 | 1          | Promoter-associated |
| cg17935297 | 0.064832   | 0.049099 | 0.00E+00 | 19         | Body                |
| cg17935677 | 0.04203    | 0.035253 | 2.47E-07 | 15         | Promoter-associated |
| cg17937102 | 0.055529   | 0.045957 | 2.00E-09 | 1          | Promoter-associated |
| cg17941743 | 0.058562   | 0.042706 | 1.48E-07 | 2          | Body                |
| cg17947053 | 0.052083   | 0.039732 | 9.70E-08 | 10         | Promoter-associated |
| cg17952111 | 0.114902   | 0.08049  | 3.60E-08 | 19         | Promoter-associated |
| cg17992564 | 0.841924   | 0.866233 | 5.00E-08 | 8          | Body                |
| cg18044572 | 0.296404   | 0.227673 | 1.28E-07 | 7          | Body                |
| cg18050139 | 0.75684    | 0.68744  | 4.37E-07 | 12         | Intergenic          |
| cg18054956 | 0.127586   | 0.093605 | 0.00E+00 | 17         | Promoter-associated |
| cg18064631 | 0.197289   | 0.168532 | 3.70E-07 | 13         | Body                |
| cg18064852 | 0.05582    | 0.04007  | 4.40E-08 | 5          | Intergenic          |
| cg18093693 | 0.130118   | 0.148778 | 8.00E-09 | 15         | Promoter-associated |
| cg18114235 | 0.050868   | 0.040483 | 4.90E-07 | 19         | Body                |
| cg18127966 | 0.132964   | 0.151318 | 6.00E-09 | 14         | Body                |
| cg18149593 | 0.108375   | 0.12952  | 1.08E-07 | 2          | Promoter-associated |
| cg18151674 | 0.424574   | 0.388927 | 1.21E-07 | 1          | Intergenic          |
| cg18152809 | 0.080209   | 0.060141 | 2.86E-07 | 8          | Promoter-associated |

| IlluminaID | Maltreated | Control  | p-value  | Chromosome | CpG site location   |
|------------|------------|----------|----------|------------|---------------------|
| cg18159230 | 0.042949   | 0.032227 | 2.60E-08 | 1          | 5'UTR               |
| cg18193950 | 0.481253   | 0.414577 | 0.00E+00 | 2          | Body                |
| cg18202623 | 0.103574   | 0.081759 | 4.95E-07 | 4          | Body                |
| cg18217235 | 0.291616   | 0.233582 | 4.27E-07 | 6          | Intergenic          |
| cg18222582 | 0.166799   | 0.189053 | 1.80E-08 | 1          | Intergenic          |
| cg18232871 | 0.1808     | 0.146081 | 1.28E-07 | 1          | Body                |
| cg18247126 | 0.154462   | 0.185418 | 1.10E-08 | 11         | Promoter-associated |
| cg18247177 | 0.125098   | 0.144131 | 3.00E-09 | 17         | Promoter-associated |
| cg18250651 | 0.100864   | 0.087596 | 0.00E+00 | 14         | Promoter-associated |
| cg18263841 | 0.67005    | 0.626443 | 3.53E-07 | 17         | Body                |
| cg18264753 | 0.084637   | 0.068568 | 9.00E-08 | 6          | 5'UTR               |
| cg18268492 | 0.13129    | 0.098757 | 5.10E-08 | 10         | Promoter-associated |
| cg18270113 | 0.184445   | 0.154475 | 4.49E-07 | 7          | Intergenic          |
| cg18275445 | 0.027462   | 0.021109 | 1.14E-07 | 14         | Promoter-associated |
| cg18280830 | 0.170018   | 0.133015 | 1.70E-07 | 14         | Intergenic          |
| cg18287962 | 0.159254   | 0.128358 | 1.90E-08 | 20         | 5'UTR               |
| cg18313340 | 0.151071   | 0.109918 | 9.90E-08 | 13         | Intergenic          |
| cg18313694 | 0.285077   | 0.228173 | 1.66E-07 | 15         | Body                |
| cg18315835 | 0.855614   | 0.888658 | 0.00E+00 | 15         | Intergenic          |
| cg18319533 | 0.76542    | 0.675966 | 4.83E-07 | 11         | 3'UTR               |
| cg18329036 | 0.196968   | 0.241817 | 3.85E-07 | 20         | Body                |
| cg18342462 | 0.118671   | 0.092088 | 2.13E-07 | 11         | Body                |
| cg18344938 | 0.127806   | 0.144721 | 4.44E-07 | 5          | Intergenic          |
| cg18351099 | 0.065253   | 0.049575 | 1.00E-09 | 19         | Promoter-associated |
| cg18382590 | 0.151485   | 0.168344 | 4.12E-07 | 9          | Promoter-associated |
| cg18386163 | 0.054723   | 0.043258 | 0.00E+00 | 10         | Body                |
| cg18388972 | 0.229931   | 0.256574 | 3.50E-08 | 1          | Body                |
| cg18396793 | 0.430939   | 0.397557 | 5.00E-09 | 20         | Promoter-associated |
| cg18400845 | 0.050329   | 0.038732 | 3.76E-07 | 11         | 5'UTR               |
| cg18404039 | 0.084785   | 0.063819 | 7.30E-08 | 20         | Promoter-associated |
| cg18416576 | 0.079412   | 0.058472 | 9.30E-08 | 7          | Body                |
| cg18436758 | 0.277174   | 0.219884 | 1.80E-08 | 1          | Promoter-associated |
| cg18449345 | 0.242572   | 0.192923 | 4.92E-07 | 7          | Body                |
| cg18455490 | 0.099273   | 0.070726 | 1.00E-09 | 2          | Body                |
| cg18457669 | 0.858712   | 0.881742 | 4.39E-07 | 13         | Intergenic          |
| cg18465689 | 0.183928   | 0.139399 | 4.10E-08 | 17         | Promoter-associated |
| cg18466911 | 0.084344   | 0.062179 | 2.40E-07 | 6          | Body                |
| cg18471235 | 0.682617   | 0.737884 | 0.00E+00 | 11         | Body                |
| cg18475969 | 0.106631   | 0.079148 | 4.30E-08 | 3          | Intergenic          |
| cg18479656 | 0.114237   | 0.088595 | 2.80E-08 | 12         | Body                |
| cg18500469 | 0.11527    | 0.133203 | 1.81E-07 | 4          | Body                |
| cg18528124 | 0.85749    | 0.82321  | 6.20E-08 | 11         | Body                |
| cg18531720 | 0.575269   | 0.502076 | 0.00E+00 | 3          | Body                |
| cg18536843 | 0.225088   | 0.176273 | 0.00E+00 | 7          | Promoter-associated |
| cg18547505 | 0.67302    | 0.625685 | 3.00E-09 | 12         | Intergenic          |
| cg18560204 | 0.098283   | 0.077392 | 8.80E-08 | 15         | Body                |
| cg18580865 | 0.056002   | 0.046115 | 2.66E-07 | 12         | Promoter-associated |
| cg18584907 | 0.140939   | 0.160422 | 2.52E-07 | 2          | Promoter-associated |
| cg18594562 | 0.118087   | 0.090354 | 2.54E-07 | 20         | Body                |
| cg18602811 | 0.10624    | 0.126732 | 1.10E-08 | 3          | Promoter-associated |
| cg18614984 | 0.048777   | 0.038237 | 1.56E-07 | 17         | Body                |
| cg18615222 | 0.788213   | 0.815224 | 2.97E-07 | 17         | Body                |
| cg18631743 | 0.331185   | 0.257521 | 7.00E-09 | 22         | Body                |

| lluminalID | Maltreated | Control  | p-value  | Chromosome | CpG site location   |
|------------|------------|----------|----------|------------|---------------------|
| cg18631996 | 0.119799   | 0.091084 | 3.04E-07 | 5          | Intergenic          |
| cg18632135 | 0.100583   | 0.076713 | 1.00E-08 | 6          | Body                |
| cg18637459 | 0.187478   | 0.13546  | 5.00E-09 | 12         | Body                |
| cg18638018 | 0.183169   | 0.242581 | 4.10E-08 | 12         | Intergenic          |
| cg18640608 | 0.130013   | 0.146239 | 3.03E-07 | 19         | Promoter-associated |
| cg18652941 | 0.128967   | 0.15442  | 1.00E-09 | 11         | Body                |
| cg18671984 | 0.889085   | 0.910202 | 1.07E-07 | 19         | Body                |
| cg18674783 | 0.129173   | 0.149709 | 2.29E-07 | 6          | Promoter-associated |
| cg18689130 | 0.137867   | 0.157673 | 3.30E-08 | 6          | Promoter-associated |
| cg18697049 | 0.095986   | 0.113139 | 2.10E-08 | 6          | Body                |
| cg18703581 | 0.042097   | 0.032387 | 2.61E-07 | 6          | 3'UTR               |
| cg18704201 | 0.881111   | 0.896723 | 3.90E-08 | 2          | Intergenic          |
| cg18707501 | 0.76436    | 0.641369 | 4.35E-07 | 15         | Body                |
| cg18710383 | 0.164722   | 0.183004 | 3.16E-07 | 6          | Promoter-associated |
| cg18719723 | 0.113865   | 0.131645 | 3.59E-07 | 12         | Body                |
| cg18727501 | 0.190679   | 0.168993 | 1.00E-09 | 4          | Promoter-associated |
| cg18730307 | 0.737608   | 0.697213 | 4.00E-08 | 3          | 5'UTR               |
| cg18739800 | 0.112882   | 0.087895 | 1.06E-07 | 6          | Promoter-associated |
| cg18748981 | 0.412007   | 0.35735  | 2.46E-07 | X          | Body                |
| cg18760916 | 0.168457   | 0.23075  | 1.09E-07 | 13         | Promoter-associated |
| cg18776992 | 0.143078   | 0.119136 | 2.75E-07 | 19         | Promoter-associated |
| cg18789337 | 0.152869   | 0.170305 | 2.13E-07 | 6          | Body                |
| cg18826070 | 0.861583   | 0.887503 | 1.00E-09 | 10         | 3'UTR               |
| cg18838133 | 0.730001   | 0.771538 | 2.19E-07 | 2          | Body                |
| cg18842717 | 0.119525   | 0.100119 | 4.44E-07 | 11         | 5'UTR               |
| cg18844301 | 0.068114   | 0.047234 | 2.98E-07 | 2          | 5'UTR               |
| cg18851521 | 0.100971   | 0.067824 | 3.30E-08 | 18         | Promoter-associated |
| cg18857062 | 0.116577   | 0.083879 | 3.62E-07 | 6          | Body                |
| cg18857889 | 0.36775    | 0.296721 | 5.80E-08 | 7          | Body                |
| cg18878210 | 0.575736   | 0.465901 | 1.56E-07 | 10         | Intergenic          |
| cg18878891 | 0.151355   | 0.172556 | 1.56E-07 | 9          | 5'UTR               |
| cg18880390 | 0.14157    | 0.166101 | 1.00E-09 | 1          | 5'UTR               |
| cg18887371 | 0.728854   | 0.767838 | 1.70E-08 | 12         | Intergenic          |
| cg18892096 | 0.729633   | 0.759827 | 4.95E-07 | 1          | Intergenic          |
| cg18897026 | 0.833372   | 0.869685 | 3.90E-08 | 8          | Body                |
| cg18909525 | 0.164766   | 0.184096 | 2.38E-07 | 9          | Promoter-associated |
| cg18909530 | 0.149284   | 0.168155 | 4.20E-08 | 10         | Body                |
| cg18918365 | 0.414631   | 0.365749 | 1.25E-07 | 10         | Body                |
| cg18956549 | 0.057853   | 0.046326 | 1.67E-07 | 12         | Intergenic          |
| cg18970754 | 0.131417   | 0.098595 | 2.86E-07 | 14         | Intergenic          |
| cg18986451 | 0.120086   | 0.13848  | 3.00E-08 | 3          | 5'UTR               |
| cg19008858 | 0.138363   | 0.158783 | 2.06E-07 | 17         | Promoter-associated |
| cg19018097 | 0.131452   | 0.149278 | 4.01E-07 | 11         | Promoter-associated |
| cg19025430 | 0.12826    | 0.097135 | 1.05E-07 | 5          | Promoter-associated |
| cg19063972 | 0.109168   | 0.126425 | 2.44E-07 | 13         | Body                |
| cg19089844 | 0.15915    | 0.181429 | 4.70E-08 | 2          | Promoter-associated |
| cg19109608 | 0.079459   | 0.048772 | 4.10E-07 | 10         | Promoter-associated |
| cg19115941 | 0.086108   | 0.062904 | 4.30E-07 | 12         | Body                |
| cg19120064 | 0.174535   | 0.247073 | 1.00E-09 | 10         | Body                |
| cg19131205 | 0.040127   | 0.030417 | 4.00E-09 | 6          | Body                |
| cg19160555 | 0.085487   | 0.0723   | 2.44E-07 | 6          | Promoter-associated |
| cg19161053 | 0.139738   | 0.157745 | 5.90E-08 | 7          | 5'UTR               |
| cg19165274 | 0.325532   | 0.255571 | 7.00E-09 | 10         | Body                |



| lluminalID | Maltreated | Control  | p-value  | Chromosome | CpG site location   |
|------------|------------|----------|----------|------------|---------------------|
| cg19187486 | 0.111728   | 0.13196  | 1.10E-07 | 15         | Promoter-associated |
| cg19187831 | 0.032473   | 0.02518  | 2.50E-08 | 11         | Body                |
| cg19189990 | 0.079723   | 0.066606 | 3.00E-09 | 11         | Promoter-associated |
| cg19191258 | 0.926045   | 0.940209 | 3.20E-07 | 10         | Body                |
| cg19195327 | 0.188995   | 0.216098 | 7.90E-08 | 1          | Body                |
| cg19226007 | 0.070072   | 0.039969 | 4.43E-07 | 17         | Body                |
| cg19226370 | 0.842496   | 0.85946  | 4.54E-07 | 1          | Body                |
| cg19229622 | 0.12511    | 0.141509 | 2.81E-07 | 11         | Body                |
| cg19240584 | 0.519037   | 0.48187  | 0.00E+00 | 7          | Intergenic          |
| cg19243391 | 0.23535    | 0.334839 | 2.70E-07 | 12         | Promoter-associated |
| cg19244342 | 0.472559   | 0.45333  | 3.08E-07 | 2          | Body                |
| cg19258062 | 0.209123   | 0.167912 | 3.52E-07 | 7          | Promoter-associated |
| cg19264123 | 0.099261   | 0.113109 | 2.98E-07 | 18         | Promoter-associated |
| cg19273467 | 0.140586   | 0.164652 | 0.00E+00 | 1          | Promoter-associated |
| cg19280121 | 0.110478   | 0.124429 | 4.83E-07 | 17         | Body                |
| cg19283960 | 0.027859   | 0.023617 | 1.59E-07 | 1          | Body                |
| cg19303637 | 0.119886   | 0.137184 | 8.40E-08 | 13         | 5'UTR               |
| cg19324437 | 0.063319   | 0.049448 | 9.10E-08 | 19         | Intergenic          |
| cg19345149 | 0.118165   | 0.095224 | 6.00E-09 | 11         | Promoter-associated |
| cg19346371 | 0.072794   | 0.049076 | 3.42E-07 | 12         | Body                |
| cg19347576 | 0.036134   | 0.028041 | 4.73E-07 | 18         | Promoter-associated |
| cg19354746 | 0.20659    | 0.171723 | 3.60E-07 | 22         | Body                |
| cg19374457 | 0.048867   | 0.036474 | 2.22E-07 | 1          | Promoter-associated |
| cg19383360 | 0.340759   | 0.29287  | 2.98E-07 | X          | 5'UTR               |
| cg19383577 | 0.103623   | 0.117788 | 3.67E-07 | 16         | Promoter-associated |
| cg19393587 | 0.679499   | 0.718808 | 4.70E-07 | 2          | 3'UTR               |
| cg19403339 | 0.287654   | 0.25168  | 9.00E-09 | 2          | Promoter-associated |
| cg19417921 | 0.927627   | 0.941442 | 4.69E-07 | 19         | Intergenic          |
| cg19419581 | 0.182908   | 0.216336 | 0.00E+00 | 17         | Intergenic          |
| cg19419801 | 0.120755   | 0.138857 | 4.61E-07 | 4          | Body                |
| cg19423622 | 0.276855   | 0.218276 | 8.00E-09 | 7          | Body                |
| cg19424060 | 0.879952   | 0.901304 | 1.56E-07 | 19         | 3'UTR               |
| cg19448269 | 0.082139   | 0.062033 | 4.10E-08 | 6          | Promoter-associated |
| cg19452853 | 0.080394   | 0.063595 | 7.50E-08 | 22         | Promoter-associated |
| cg19453794 | 0.594361   | 0.630871 | 4.00E-09 | 4          | Promoter-associated |
| cg19463885 | 0.136805   | 0.155211 | 7.10E-08 | 2          | Body                |
| cg19464804 | 0.155886   | 0.131502 | 4.07E-07 | 15         | Intergenic          |
| cg19467738 | 0.024904   | 0.016709 | 1.26E-07 | 11         | Promoter-associated |
| cg19536713 | 0.458111   | 0.395958 | 3.94E-07 | 4          | Promoter-associated |
| cg19542841 | 0.381216   | 0.340876 | 3.95E-07 | 11         | Promoter-associated |
| cg19574017 | 0.159753   | 0.119072 | 1.00E-09 | 15         | Body                |
| cg19585412 | 0.138335   | 0.108893 | 1.30E-08 | 14         | Intergenic          |
| cg19591588 | 0.02777    | 0.021661 | 1.32E-07 | 3          | Promoter-associated |
| cg19595750 | 0.041129   | 0.026622 | 1.70E-08 | 12         | Body                |
| cg19631766 | 0.164592   | 0.130716 | 4.51E-07 | X          | Body                |
| cg19642148 | 0.176964   | 0.199953 | 2.44E-07 | 3          | 5'UTR               |
| cg19643390 | 0.055324   | 0.041097 | 1.80E-08 | 17         | Body                |
| cg19672997 | 0.124202   | 0.107284 | 4.96E-07 | 14         | Body                |
| cg19676328 | 0.063666   | 0.046686 | 4.71E-07 | 12         | Promoter-associated |
| cg19677607 | 0.024833   | 0.017452 | 2.41E-07 | 8          | Promoter-associated |
| cg19683457 | 0.260536   | 0.208949 | 0.00E+00 | 6          | Promoter-associated |
| cg19689672 | 0.493688   | 0.452221 | 3.39E-07 | 12         | Intergenic          |
| cg19692750 | 0.118213   | 0.140314 | 2.30E-08 | 11         | Intergenic          |

| lluminalID | Maltreated | Control  | p-value  | Chromosome | CpG site location   |
|------------|------------|----------|----------|------------|---------------------|
| cg19697085 | 0.020297   | 0.015959 | 3.30E-08 | 1          | Body                |
| cg19701416 | 0.131986   | 0.156547 | 9.20E-08 | 10         | Intergenic          |
| cg19717586 | 0.082868   | 0.059447 | 1.00E-09 | 11         | Body                |
| cg19734937 | 0.787449   | 0.829388 | 2.70E-08 | 2          | Intergenic          |
| cg19737787 | 0.147931   | 0.105541 | 8.00E-08 | 13         | Intergenic          |
| cg19755007 | 0.093243   | 0.074016 | 4.40E-08 | 11         | Body                |
| cg19762811 | 0.842776   | 0.872275 | 2.90E-08 | 1          | Body                |
| cg19764325 | 0.054031   | 0.045049 | 5.70E-08 | 22         | Body                |
| cg19764421 | 0.10325    | 0.078729 | 1.24E-07 | 1          | Body                |
| cg19777710 | 0.858551   | 0.883429 | 3.10E-08 | 1          | Body                |
| cg19793697 | 0.093479   | 0.071442 | 1.25E-07 | 19         | Body                |
| cg19831303 | 0.089947   | 0.066598 | 7.80E-08 | 11         | Promoter-associated |
| cg19834071 | 0.106723   | 0.125827 | 3.00E-07 | 19         | Body                |
| cg19839588 | 0.13807    | 0.157927 | 0.00E+00 | 6          | Promoter-associated |
| cg19851384 | 0.070129   | 0.049254 | 2.92E-07 | 11         | Body                |
| cg19853194 | 0.103238   | 0.121669 | 2.51E-07 | 18         | Promoter-associated |
| cg19862389 | 0.773078   | 0.809018 | 2.13E-07 | 1          | Body                |
| cg19866325 | 0.95218    | 0.962493 | 2.35E-07 | 1          | Body                |
| cg19884546 | 0.131987   | 0.148634 | 4.10E-08 | 22         | Promoter-associated |
| cg19898668 | 0.312615   | 0.256953 | 3.00E-08 | 14         | 3'UTR               |
| cg19910399 | 0.042125   | 0.030956 | 1.81E-07 | 17         | Body                |
| cg19916067 | 0.903187   | 0.919844 | 2.08E-07 | 8          | Body                |
| cg19921271 | 0.118705   | 0.090153 | 3.70E-08 | 22         | Body                |
| cg19930116 | 0.211033   | 0.26022  | 2.75E-07 | 14         | Body                |
| cg19940437 | 0.106254   | 0.125211 | 6.40E-08 | 14         | Body                |
| cg19941170 | 0.188557   | 0.158951 | 1.70E-07 | 5          | Body                |
| cg19977408 | 0.085764   | 0.06907  | 1.01E-07 | 4          | Promoter-associated |
| cg19996355 | 0.1074     | 0.127556 | 2.58E-07 | 19         | Promoter-associated |
| cg20008148 | 0.289061   | 0.218883 | 2.86E-07 | 14         | Body                |
| cg20023102 | 0.392993   | 0.465027 | 4.70E-08 | 13         | Promoter-associated |
| cg20033437 | 0.760761   | 0.792312 | 5.10E-08 | 10         | Intergenic          |
| cg20034209 | 0.112373   | 0.083552 | 3.34E-07 | 17         | Body                |
| cg20065463 | 0.147812   | 0.098923 | 4.30E-08 | 2          | Body                |
| cg20068320 | 0.401698   | 0.359705 | 3.50E-08 | 12         | Body                |
| cg20071523 | 0.241169   | 0.294465 | 1.09E-07 | 14         | Promoter-associated |
| cg20082779 | 0.774096   | 0.803201 | 2.31E-07 | 7          | 5'UTR               |
| cg20084652 | 0.771021   | 0.810467 | 2.40E-08 | 11         | 5'UTR               |
| cg20095036 | 0.049123   | 0.037603 | 4.80E-08 | 4          | Body                |
| cg20104688 | 0.130492   | 0.152647 | 4.70E-08 | 17         | Body                |
| cg20110347 | 0.544943   | 0.46881  | 8.40E-08 | 19         | Body                |
| cg20116199 | 0.205554   | 0.150849 | 5.00E-09 | 12         | Body                |
| cg20131194 | 0.027971   | 0.020474 | 3.51E-07 | 11         | Body                |
| cg20133890 | 0.507806   | 0.454424 | 3.71E-07 | 6          | Body                |
| cg20163113 | 0.765295   | 0.809774 | 7.00E-09 | 6          | Body                |
| cg20174636 | 0.045229   | 0.031796 | 7.40E-08 | 2          | Body                |
| cg20181420 | 0.176135   | 0.1162   | 9.00E-09 | 10         | Body                |
| cg20189904 | 0.069499   | 0.050768 | 1.90E-07 | 20         | Body                |
| cg20194814 | 0.491947   | 0.461967 | 1.50E-08 | 17         | Intergenic          |
| cg20208398 | 0.232671   | 0.277006 | 4.55E-07 | 7          | 5'UTR               |
| cg20224813 | 0.119901   | 0.137569 | 4.55E-07 | 6          | Promoter-associated |
| cg20250396 | 0.118572   | 0.094408 | 7.40E-08 | 14         | 5'UTR               |
| cg20255284 | 0.725201   | 0.746449 | 3.36E-07 | 2          | Intergenic          |
| cg20279479 | 0.383098   | 0.315688 | 1.11E-07 | X          | 5'UTR               |

| lluminalID | Maltreated | Control  | p-value  | Chromosome | CpG site location   |
|------------|------------|----------|----------|------------|---------------------|
| cg20282550 | 0.215631   | 0.119011 | 6.90E-08 | 10         | Body                |
| cg20284440 | 0.097618   | 0.11486  | 2.72E-07 | 14         | Body                |
| cg20297940 | 0.841647   | 0.814875 | 1.05E-07 | 1          | Intergenic          |
| cg20301980 | 0.733382   | 0.755557 | 4.08E-07 | 7          | Intergenic          |
| cg20317272 | 0.050926   | 0.037176 | 3.58E-07 | 18         | 5'UTR               |
| cg20318726 | 0.091695   | 0.070455 | 1.60E-08 | 4          | Body                |
| cg20320905 | 0.363812   | 0.318615 | 1.00E-09 | 2          | Body                |
| cg20325293 | 0.29322    | 0.204368 | 5.00E-09 | 4          | Body                |
| cg20334849 | 0.091649   | 0.052824 | 1.82E-07 | 11         | Body                |
| cg20354231 | 0.756719   | 0.810333 | 7.00E-09 | 13         | Intergenic          |
| cg20377447 | 0.906276   | 0.920586 | 2.65E-07 | 6          | Body                |
| cg20387069 | 0.361987   | 0.313314 | 1.29E-07 | 6          | Promoter-associated |
| cg20401896 | 0.833526   | 0.854548 | 4.63E-07 | 2          | Intergenic          |
| cg20405918 | 0.079924   | 0.059108 | 1.15E-07 | 12         | Promoter-associated |
| cg20418204 | 0.785427   | 0.808741 | 8.00E-09 | 12         | Intergenic          |
| cg20420867 | 0.166323   | 0.130897 | 3.12E-07 | 1          | Body                |
| cg20426994 | 0.053318   | 0.043312 | 1.67E-07 | 7          | Body                |
| cg20448617 | 0.686545   | 0.578192 | 3.49E-07 | 7          | Body                |
| cg20471045 | 0.099828   | 0.08026  | 3.55E-07 | 19         | Body                |
| cg20485124 | 0.140218   | 0.15906  | 4.90E-08 | 11         | Body                |
| cg20496134 | 0.831414   | 0.848502 | 1.16E-07 | 2          | Body                |
| cg20510500 | 0.073353   | 0.118478 | 3.29E-07 | 1          | Intergenic          |
| cg20518154 | 0.131593   | 0.106562 | 2.36E-07 | 20         | Body                |
| cg20536983 | 0.048521   | 0.035169 | 4.11E-07 | 8          | Body                |
| cg20540327 | 0.134159   | 0.151949 | 2.30E-08 | 15         | Promoter-associated |
| cg20562176 | 0.102354   | 0.119665 | 9.00E-09 | 19         | Promoter-associated |
| cg20563759 | 0.100403   | 0.080179 | 3.92E-07 | 5          | Body                |
| cg20566420 | 0.181777   | 0.204377 | 3.30E-08 | 12         | Promoter-associated |
| cg20584198 | 0.104856   | 0.121403 | 8.70E-08 | 12         | Body                |
| cg20592700 | 0.449797   | 0.356937 | 7.80E-08 | 7          | Body                |
| cg20608329 | 0.852229   | 0.870046 | 4.46E-07 | 15         | Body                |
| cg20616645 | 0.651176   | 0.630666 | 1.07E-07 | 10         | Intergenic          |
| cg20617676 | 0.076347   | 0.056132 | 1.00E-09 | 7          | Promoter-associated |
| cg20618357 | 0.038604   | 0.030304 | 4.80E-08 | 6          | Promoter-associated |
| cg20621200 | 0.253627   | 0.183343 | 1.95E-07 | 11         | Intergenic          |
| cg20625065 | 0.210707   | 0.157674 | 0.00E+00 | 20         | Body                |
| cg20641580 | 0.125415   | 0.149262 | 2.46E-07 | 22         | Promoter-associated |
| cg20652235 | 0.040592   | 0.035182 | 3.43E-07 | 19         | Intergenic          |
| cg20656751 | 0.496139   | 0.453324 | 1.54E-07 | 4          | Body                |
| cg20659435 | 0.226778   | 0.163887 | 1.22E-07 | 10         | Intergenic          |
| cg20676418 | 0.180082   | 0.205437 | 1.90E-08 | 11         | Body                |
| cg20679955 | 0.120708   | 0.136961 | 3.00E-09 | 18         | Body                |
| cg20681219 | 0.059525   | 0.047045 | 3.10E-08 | 4          | Promoter-associated |
| cg20697630 | 0.132387   | 0.102432 | 2.80E-08 | 1          | Body                |
| cg20703731 | 0.761161   | 0.78993  | 7.00E-08 | 5          | 3'UTR               |
| cg20711218 | 0.199268   | 0.163156 | 4.55E-07 | 20         | Intergenic          |
| cg20719132 | 0.036141   | 0.026019 | 5.00E-09 | 19         | Body                |
| cg20720553 | 0.106827   | 0.085627 | 4.07E-07 | 15         | Promoter-associated |
| cg20728514 | 0.271557   | 0.201826 | 2.63E-07 | 22         | Body                |
| cg20732478 | 0.049199   | 0.034409 | 0.00E+00 | 2          | Body                |
| cg20742906 | 0.060031   | 0.04624  | 2.40E-08 | 10         | Promoter-associated |
| cg20758982 | 0.061655   | 0.049473 | 6.70E-08 | 6          | Promoter-associated |
| cg20769334 | 0.289085   | 0.20439  | 1.00E-09 | 22         | 5'UTR               |

| IlluminaID | Maltreated | Control  | p-value  | Chromosome | CpG site location   |
|------------|------------|----------|----------|------------|---------------------|
| cg20785796 | 0.194505   | 0.160769 | 4.62E-07 | 2          | Body                |
| cg20787693 | 0.213562   | 0.239829 | 4.80E-08 | 1          | 5'UTR               |
| cg20807000 | 0.120986   | 0.138282 | 2.47E-07 | 1          | Promoter-associated |
| cg20809690 | 0.475363   | 0.351907 | 0.00E+00 | 4          | Promoter-associated |
| cg20809997 | 0.057501   | 0.046367 | 1.45E-07 | 1          | Body                |
| cg20810288 | 0.061902   | 0.043899 | 5.20E-08 | 1          | 5'UTR               |
| cg20815701 | 0.138589   | 0.104469 | 3.40E-08 | 1          | Body                |
| cg20841377 | 0.123593   | 0.150539 | 2.43E-07 | 4          | Promoter-associated |
| cg20848987 | 0.121141   | 0.136155 | 6.10E-08 | 17         | Promoter-associated |
| cg20849549 | 0.137596   | 0.15983  | 1.68E-07 | 10         | Body                |
| cg20862669 | 0.124025   | 0.144083 | 1.35E-07 | 2          | Body                |
| cg20863947 | 0.102352   | 0.117639 | 1.16E-07 | 2          | Body                |
| cg20881074 | 0.193085   | 0.165866 | 3.00E-08 | 2          | Body                |
| cg20891060 | 0.633567   | 0.572623 | 2.12E-07 | 11         | Intergenic          |
| cg20905746 | 0.197363   | 0.226445 | 2.20E-08 | 15         | Promoter-associated |
| cg20926035 | 0.040729   | 0.029874 | 2.80E-08 | 2          | Body                |
| cg20956366 | 0.282577   | 0.33678  | 8.10E-08 | 7          | Promoter-associated |
| cg20956633 | 0.095499   | 0.073474 | 4.90E-08 | 20         | Body                |
| cg20962117 | 0.117829   | 0.092549 | 1.06E-07 | 9          | Intergenic          |
| cg20999932 | 0.382907   | 0.318473 | 3.44E-07 | 14         | Body                |
| cg21002651 | 0.111597   | 0.143682 | 6.80E-08 | 11         | Body                |
| cg21005948 | 0.064162   | 0.039469 | 3.29E-07 | 18         | Body                |
| cg21011652 | 0.21278    | 0.241069 | 4.70E-08 | 1          | Promoter-associated |
| cg21051989 | 0.052034   | 0.040407 | 1.00E-08 | 6          | 5'UTR               |
| cg21052608 | 0.169932   | 0.219585 | 1.81E-07 | 5          | Intergenic          |
| cg21053644 | 0.563129   | 0.494863 | 6.20E-08 | 12         | Intergenic          |
| cg21056706 | 0.057305   | 0.045633 | 1.70E-08 | 7          | Intergenic          |
| cg21076935 | 0.072811   | 0.055127 | 1.40E-07 | 2          | Body                |
| cg21126453 | 0.838743   | 0.877511 | 9.50E-08 | 7          | Body                |
| cg21144340 | 0.915114   | 0.929385 | 0.00E+00 | 6          | Intergenic          |
| cg21150049 | 0.070801   | 0.052601 | 1.32E-07 | 12         | Promoter-associated |
| cg21166047 | 0.863224   | 0.891101 | 1.00E-09 | 9          | Intergenic          |
| cg21167453 | 0.773341   | 0.802572 | 9.30E-08 | 1          | Body                |
| cg21188454 | 0.086184   | 0.059014 | 2.00E-09 | 9          | Promoter-associated |
| cg21197232 | 0.771396   | 0.800566 | 5.00E-09 | 6          | Promoter-associated |
| cg21215323 | 0.100494   | 0.114418 | 9.00E-09 | 15         | Body                |
| cg21216600 | 0.139182   | 0.194101 | 4.24E-07 | 7          | Body                |
| cg21220731 | 0.102866   | 0.074588 | 0.00E+00 | 4          | Promoter-associated |
| cg21240523 | 0.061366   | 0.045932 | 3.13E-07 | 9          | Body                |
| cg21242584 | 0.146198   | 0.11557  | 3.49E-07 | 8          | Body                |
| cg21245981 | 0.142022   | 0.17113  | 2.76E-07 | 5          | Body                |
| cg21255732 | 0.153045   | 0.177011 | 4.46E-07 | 3          | Promoter-associated |
| cg21271767 | 0.098614   | 0.077709 | 1.14E-07 | 15         | Promoter-associated |
| cg21276379 | 0.100855   | 0.115682 | 1.12E-07 | 2          | Body                |
| cg21284376 | 0.174666   | 0.142186 | 4.20E-08 | 1          | Promoter-associated |
| cg21295476 | 0.051529   | 0.038443 | 1.11E-07 | 2          | Intergenic          |
| cg21308919 | 0.848305   | 0.873792 | 3.60E-08 | 4          | Body                |
| cg21354621 | 0.103346   | 0.118051 | 2.65E-07 | 12         | Promoter-associated |
| cg21396553 | 0.437463   | 0.361232 | 5.00E-09 | 2          | Body                |
| cg21412928 | 0.118816   | 0.09936  | 8.00E-09 | 6          | Promoter-associated |
| cg21441716 | 0.89615    | 0.859365 | 3.87E-07 | 1          | Intergenic          |
| cg21462914 | 0.936763   | 0.858796 | 4.96E-07 | 8          | Intergenic          |
| cg21470824 | 0.110037   | 0.124716 | 2.15E-07 | 5          | Promoter-associated |

| lluminalID | Maltreated | Control  | p-value  | Chromosome | CpG site location   |
|------------|------------|----------|----------|------------|---------------------|
| cg21487894 | 0.217865   | 0.17155  | 9.00E-09 | 17         | Promoter-associated |
| cg21494445 | 0.248614   | 0.294678 | 2.15E-07 | 7          | Body                |
| cg21497641 | 0.254339   | 0.312565 | 6.10E-08 | 17         | Intergenic          |
| cg21497990 | 0.088332   | 0.062404 | 2.80E-08 | 7          | Body                |
| cg21499459 | 0.502757   | 0.557103 | 1.30E-08 | 4          | Body                |
| cg21500166 | 0.261939   | 0.191049 | 4.00E-09 | 12         | Body                |
| cg21501525 | 0.056495   | 0.03734  | 1.14E-07 | 19         | Intergenic          |
| cg21511365 | 0.048945   | 0.03936  | 6.60E-08 | 8          | Intergenic          |
| cg21547982 | 0.165236   | 0.20822  | 2.18E-07 | 3          | Body                |
| cg21567625 | 0.148806   | 0.180925 | 2.70E-08 | 5          | Promoter-associated |
| cg21578640 | 0.091965   | 0.070993 | 1.18E-07 | 19         | Body                |
| cg21639114 | 0.057407   | 0.043024 | 5.00E-09 | 6          | Intergenic          |
| cg21648376 | 0.683226   | 0.559501 | 4.38E-07 | 1          | 5'UTR               |
| cg21649051 | 0.053389   | 0.043411 | 4.64E-07 | 1          | Body                |
| cg21653878 | 0.18245    | 0.140691 | 3.24E-07 | 19         | Promoter-associated |
| cg21666675 | 0.119744   | 0.137579 | 1.50E-08 | 3          | Body                |
| cg21670451 | 0.121697   | 0.140683 | 2.38E-07 | 5          | Body                |
| cg21692450 | 0.269453   | 0.212973 | 2.70E-08 | 1          | Intergenic          |
| cg21708130 | 0.226735   | 0.286003 | 3.21E-07 | 2          | Promoter-associated |
| cg21712322 | 0.081398   | 0.065814 | 2.00E-09 | 2          | Intergenic          |
| cg21717959 | 0.039858   | 0.032441 | 9.30E-08 | 6          | Body                |
| cg21741689 | 0.041648   | 0.030571 | 2.12E-07 | 3          | Intergenic          |
| cg21743569 | 0.110128   | 0.130189 | 5.70E-08 | 19         | Promoter-associated |
| cg21751983 | 0.142608   | 0.114899 | 9.50E-08 | 3          | Body                |
| cg21752471 | 0.027517   | 0.019195 | 4.00E-09 | 5          | Body                |
| cg21767135 | 0.149027   | 0.119541 | 1.00E-08 | 3          | Promoter-associated |
| cg21774736 | 0.14227    | 0.124021 | 5.00E-09 | 1          | 5'UTR               |
| cg21786233 | 0.300908   | 0.2402   | 3.78E-07 | X          | Body                |
| cg21811853 | 0.903376   | 0.916574 | 3.02E-07 | 1          | Intergenic          |
| cg21820517 | 0.155806   | 0.177321 | 2.71E-07 | 1          | Promoter-associated |
| cg21851672 | 0.300184   | 0.221911 | 2.60E-08 | 1          | Body                |
| cg21856256 | 0.126509   | 0.098459 | 5.00E-09 | 2          | Intergenic          |
| cg21863110 | 0.366287   | 0.306524 | 1.40E-08 | 1          | 3'UTR               |
| cg21865150 | 0.106662   | 0.079229 | 1.70E-08 | 17         | Body                |
| cg21866596 | 0.054963   | 0.039156 | 3.60E-07 | 11         | Promoter-associated |
| cg21875437 | 0.137884   | 0.190092 | 1.82E-07 | X          | 5'UTR               |
| cg21886612 | 0.093556   | 0.068484 | 2.18E-07 | 19         | 5'UTR               |
| cg21890848 | 0.184096   | 0.133997 | 0.00E+00 | 21         | Body                |
| cg21900616 | 0.135629   | 0.156712 | 6.70E-08 | 22         | Intergenic          |
| cg21917676 | 0.089854   | 0.105988 | 3.15E-07 | 1          | Body                |
| cg21930229 | 0.118768   | 0.134826 | 1.72E-07 | 1          | Promoter-associated |
| cg21932255 | 0.132221   | 0.149189 | 3.34E-07 | 17         | Body                |
| cg21947094 | 0.085112   | 0.07125  | 6.20E-08 | 15         | Body                |
| cg21950287 | 0.138233   | 0.108004 | 2.50E-08 | 19         | Body                |
| cg21980338 | 0.336804   | 0.300447 | 7.00E-08 | 4          | Body                |
| cg21984310 | 0.112847   | 0.131138 | 4.30E-08 | 9          | 5'UTR               |
| cg21986422 | 0.055184   | 0.036328 | 2.47E-07 | 20         | Body                |
| cg21995377 | 0.82904    | 0.85809  | 5.90E-08 | 11         | Body                |
| cg22012333 | 0.300103   | 0.242047 | 2.22E-07 | 11         | Body                |
| cg22017996 | 0.058046   | 0.04948  | 1.10E-08 | 22         | Promoter-associated |
| cg22020399 | 0.748175   | 0.595791 | 3.13E-07 | 19         | Intergenic          |
| cg22023770 | 0.129266   | 0.151212 | 2.00E-09 | 6          | Body                |
| cg22030890 | 0.130273   | 0.147928 | 1.71E-07 | 6          | Body                |

| lluminaID  | Maltreated | Control  | p-value  | Chromosome | CpG site location   |
|------------|------------|----------|----------|------------|---------------------|
| cg22041033 | 0.122389   | 0.140539 | 2.50E-08 | 17         | Body                |
| cg22044582 | 0.550422   | 0.508254 | 9.60E-08 | 19         | Intergenic          |
| cg22062239 | 0.090559   | 0.106183 | 6.00E-09 | 16         | Promoter-associated |
| cg22066186 | 0.133374   | 0.156978 | 2.48E-07 | 2          | 5'UTR               |
| cg22068764 | 0.063603   | 0.073619 | 2.21E-07 | 1          | Body                |
| cg22072935 | 0.156519   | 0.176371 | 3.18E-07 | 14         | Intergenic          |
| cg22081084 | 0.154161   | 0.178854 | 2.01E-07 | 1          | Promoter-associated |
| cg22100652 | 0.447934   | 0.398273 | 4.00E-08 | 6          | Intergenic          |
| cg22114309 | 0.46201    | 0.418337 | 0.00E+00 | 1          | Body                |
| cg22131547 | 0.494933   | 0.40945  | 3.00E-09 | 17         | Intergenic          |
| cg22136351 | 0.243459   | 0.207914 | 4.46E-07 | 5          | Body                |
| cg22161299 | 0.762662   | 0.804903 | 0.00E+00 | 19         | 5'UTR               |
| cg22168369 | 0.048676   | 0.038572 | 1.00E-08 | 1          | Body                |
| cg22191617 | 0.135849   | 0.15678  | 2.00E-09 | 2          | Body                |
| cg22192412 | 0.826342   | 0.851622 | 2.27E-07 | 2          | Intergenic          |
| cg22221067 | 0.910174   | 0.921891 | 4.13E-07 | 19         | Body                |
| cg22225685 | 0.103728   | 0.052615 | 1.83E-07 | 22         | Body                |
| cg22291265 | 0.078971   | 0.055923 | 2.30E-08 | 19         | Body                |
| cg22303084 | 0.091982   | 0.105873 | 4.87E-07 | 18         | Body                |
| cg22304507 | 0.049135   | 0.035088 | 4.00E-09 | 3          | 5'UTR               |
| cg22332076 | 0.831508   | 0.857793 | 1.79E-07 | 8          | Intergenic          |
| cg22332910 | 0.123797   | 0.141362 | 1.80E-08 | 11         | Body                |
| cg22333016 | 0.117519   | 0.103378 | 9.70E-08 | 4          | Body                |
| cg22349126 | 0.157566   | 0.111795 | 1.00E-09 | 12         | 5'UTR               |
| cg22350305 | 0.181356   | 0.206131 | 4.00E-09 | 3          | Intergenic          |
| cg22369009 | 0.767223   | 0.803838 | 1.56E-07 | 19         | Intergenic          |
| cg22380472 | 0.073205   | 0.048382 | 2.20E-08 | 19         | Promoter-associated |
| cg22385669 | 0.498086   | 0.411168 | 2.80E-08 | 15         | Body                |
| cg22390433 | 0.098208   | 0.080335 | 1.23E-07 | 1          | Promoter-associated |
| cg22392276 | 0.050876   | 0.033956 | 5.10E-08 | 14         | Body                |
| cg22415591 | 0.441507   | 0.385473 | 1.00E-09 | 7          | Body                |
| cg22417789 | 0.172802   | 0.196525 | 2.67E-07 | 13         | Promoter-associated |
| cg22455660 | 0.118462   | 0.134078 | 1.08E-07 | 9          | Body                |
| cg22460590 | 0.766849   | 0.724427 | 3.60E-08 | 7          | Intergenic          |
| cg22466217 | 0.092528   | 0.105079 | 4.23E-07 | 16         | Body                |
| cg22475576 | 0.224932   | 0.183134 | 6.50E-08 | 19         | Promoter-associated |
| cg22476897 | 0.129613   | 0.1465   | 3.52E-07 | 7          | Promoter-associated |
| cg22489759 | 0.921138   | 0.933542 | 1.20E-08 | 19         | Body                |
| cg22491629 | 0.268645   | 0.204855 | 1.00E-09 | 6          | Promoter-associated |
| cg22492020 | 0.164138   | 0.186695 | 8.80E-08 | 15         | Promoter-associated |
| cg22498057 | 0.123044   | 0.078092 | 4.62E-07 | 5          | Body                |
| cg22519672 | 0.71121    | 0.678546 | 1.93E-07 | 1          | Body                |
| cg22525688 | 0.242049   | 0.294683 | 1.01E-07 | 7          | Body                |
| cg22534627 | 0.176405   | 0.201357 | 4.00E-09 | 12         | Promoter-associated |
| cg22540129 | 0.292937   | 0.270893 | 4.45E-07 | 7          | Body                |
| cg22544688 | 0.143929   | 0.160733 | 4.27E-07 | 14         | Body                |
| cg22600043 | 0.076057   | 0.059143 | 8.90E-08 | 8          | Body                |
| cg22601215 | 0.303069   | 0.267793 | 3.84E-07 | X          | Promoter-associated |
| cg22605919 | 0.211238   | 0.164547 | 3.40E-08 | 17         | Body                |
| cg22611633 | 0.148231   | 0.166004 | 4.10E-08 | 1          | Body                |
| cg22625903 | 0.141895   | 0.163141 | 6.00E-09 | 11         | Promoter-associated |
| cg22641501 | 0.710966   | 0.761193 | 0.00E+00 | 2          | Body                |
| cg22646324 | 0.04985    | 0.039427 | 3.50E-07 | 4          | Body                |

| lluminalID | Maltreated | Control  | p-value  | Chromosome | CpG site location   |
|------------|------------|----------|----------|------------|---------------------|
| cg22654626 | 0.154238   | 0.12826  | 8.00E-08 | 19         | Promoter-associated |
| cg22691505 | 0.120176   | 0.092185 | 7.00E-09 | 7          | Promoter-associated |
| cg22694818 | 0.088536   | 0.066109 | 9.80E-08 | 1          | 5'UTR               |
| cg22708233 | 0.327141   | 0.284397 | 4.84E-07 | 11         | Body                |
| cg22711792 | 0.161009   | 0.114029 | 3.67E-07 | 1          | 3'UTR               |
| cg22720041 | 0.060999   | 0.045611 | 3.90E-08 | 19         | Body                |
| cg22776125 | 0.170808   | 0.197356 | 3.00E-09 | 6          | Body                |
| cg22781400 | 0.666386   | 0.558432 | 3.85E-07 | 19         | Body                |
| cg22793065 | 0.277504   | 0.211243 | 1.89E-07 | 5          | Body                |
| cg22798821 | 0.152162   | 0.174621 | 8.00E-09 | 11         | Promoter-associated |
| cg22812178 | 0.167978   | 0.207152 | 3.21E-07 | 14         | Promoter-associated |
| cg22843395 | 0.32595    | 0.267282 | 1.50E-08 | 14         | Promoter-associated |
| cg22851691 | 0.128027   | 0.108704 | 2.78E-07 | 17         | Intergenic          |
| cg22856324 | 0.175486   | 0.116781 | 1.17E-07 | 2          | Body                |
| cg22860534 | 0.814888   | 0.842856 | 1.00E-09 | 11         | Intergenic          |
| cg22870994 | 0.68255    | 0.729784 | 4.00E-09 | 11         | Intergenic          |
| cg22876092 | 0.223878   | 0.180967 | 3.25E-07 | 10         | Body                |
| cg22881325 | 0.709054   | 0.732858 | 7.00E-09 | 4          | Intergenic          |
| cg22897130 | 0.055988   | 0.034509 | 1.90E-08 | 10         | 5'UTR               |
| cg22902083 | 0.091244   | 0.070245 | 1.66E-07 | 19         | 5'UTR               |
| cg22904577 | 0.24385    | 0.318096 | 1.16E-07 | 4          | Promoter-associated |
| cg22908342 | 0.8991     | 0.916409 | 4.70E-08 | 6          | Intergenic          |
| cg22937649 | 0.03713    | 0.023543 | 2.59E-07 | 17         | Body                |
| cg22960135 | 0.267822   | 0.309224 | 3.53E-07 | 19         | Promoter-associated |
| cg22979783 | 0.125959   | 0.077246 | 1.14E-07 | 2          | Body                |
| cg22980722 | 0.052563   | 0.037327 | 3.14E-07 | 21         | Body                |
| cg22993358 | 0.851783   | 0.870883 | 1.71E-07 | 4          | Body                |
| cg23001456 | 0.052185   | 0.04094  | 2.95E-07 | 17         | Promoter-associated |
| cg23013392 | 0.127642   | 0.154575 | 4.00E-08 | 3          | Body                |
| cg23018092 | 0.020133   | 0.015315 | 1.42E-07 | 5          | Body                |
| cg23018400 | 0.100873   | 0.114629 | 1.10E-07 | 1          | Promoter-associated |
| cg23019286 | 0.837174   | 0.865759 | 2.70E-08 | 1          | Intergenic          |
| cg23024136 | 0.104068   | 0.082195 | 4.42E-07 | 5          | Intergenic          |
| cg23035897 | 0.07957    | 0.093982 | 2.95E-07 | 1          | Body                |
| cg23039201 | 0.182634   | 0.133488 | 4.00E-09 | 2          | Body                |
| cg23073111 | 0.326029   | 0.252096 | 2.00E-09 | 11         | Promoter-associated |
| cg23076370 | 0.18318    | 0.134697 | 3.24E-07 | 14         | Intergenic          |
| cg23095776 | 0.056733   | 0.042697 | 4.03E-07 | 19         | Body                |
| cg23101675 | 0.903294   | 0.917598 | 3.43E-07 | 17         | Intergenic          |
| cg23104823 | 0.138814   | 0.164418 | 1.77E-07 | 14         | Promoter-associated |
| cg23109134 | 0.031953   | 0.025471 | 1.39E-07 | 10         | Body                |
| cg23116115 | 0.074425   | 0.059604 | 3.62E-07 | 4          | Body                |
| cg23127064 | 0.168961   | 0.132728 | 9.00E-09 | 11         | Body                |
| cg23134100 | 0.790289   | 0.816154 | 3.40E-08 | 6          | Body                |
| cg23138682 | 0.1184     | 0.104111 | 1.54E-07 | 14         | Promoter-associated |
| cg23144563 | 0.284969   | 0.249899 | 4.62E-07 | 6          | Body                |
| cg23151353 | 0.107305   | 0.094141 | 4.92E-07 | 4          | Body                |
| cg23151401 | 0.241529   | 0.212609 | 8.40E-08 | 7          | Promoter-associated |
| cg23160087 | 0.122      | 0.144457 | 6.00E-08 | 2          | Body                |
| cg23162396 | 0.096616   | 0.074276 | 9.20E-08 | 3          | 5'UTR               |
| cg23164993 | 0.027024   | 0.021799 | 8.10E-08 | 1          | Body                |
| cg23176806 | 0.132304   | 0.107994 | 7.00E-09 | 5          | Intergenic          |
| cg23179181 | 0.205811   | 0.167638 | 1.00E-09 | 17         | Body                |

| IlluminaID | Maltreated | Control  | p-value  | Chromosome | CpG site location   |
|------------|------------|----------|----------|------------|---------------------|
| cg23187101 | 0.0813     | 0.055657 | 1.99E-07 | 19         | Promoter-associated |
| cg23203684 | 0.043742   | 0.036804 | 1.00E-09 | 5          | Body                |
| cg23204021 | 0.162088   | 0.133707 | 2.81E-07 | 1          | Body                |
| cg23221013 | 0.698583   | 0.73893  | 7.00E-09 | 7          | Body                |
| cg23240961 | 0.155296   | 0.20703  | 7.30E-08 | 12         | Promoter-associated |
| cg23243652 | 0.074359   | 0.054618 | 1.25E-07 | 5          | Body                |
| cg23244421 | 0.051142   | 0.037835 | 2.92E-07 | 17         | Promoter-associated |
| cg23260799 | 0.208818   | 0.235692 | 9.50E-08 | 11         | Promoter-associated |
| cg23266533 | 0.101705   | 0.117118 | 2.06E-07 | 7          | Body                |
| cg23272880 | 0.39395    | 0.338598 | 6.20E-08 | 17         | Intergenic          |
| cg23273935 | 0.133764   | 0.157394 | 5.20E-08 | 6          | 5'UTR               |
| cg23279117 | 0.115407   | 0.087465 | 2.45E-07 | 1          | Intergenic          |
| cg23286629 | 0.160366   | 0.18016  | 2.05E-07 | 11         | Promoter-associated |
| cg23288099 | 0.334554   | 0.278135 | 1.00E-08 | 11         | Intergenic          |
| cg23309360 | 0.240942   | 0.305834 | 3.30E-08 | 19         | Intergenic          |
| cg23313650 | 0.056658   | 0.04301  | 1.30E-08 | 7          | Promoter-associated |
| cg23315422 | 0.114874   | 0.136219 | 5.40E-08 | 18         | Promoter-associated |
| cg23319982 | 0.117236   | 0.090813 | 4.39E-07 | 19         | Intergenic          |
| cg23324048 | 0.118885   | 0.162318 | 2.07E-07 | 14         | Intergenic          |
| cg23327221 | 0.198109   | 0.264032 | 3.24E-07 | 6          | Promoter-associated |
| cg23328335 | 0.831524   | 0.864991 | 1.22E-07 | 6          | Body                |
| cg23334365 | 0.103465   | 0.070188 | 2.10E-08 | 11         | Promoter-associated |
| cg23335460 | 0.072357   | 0.056996 | 2.71E-07 | 10         | Body                |
| cg23337289 | 0.115519   | 0.138617 | 1.70E-08 | 2          | Promoter-associated |
| cg23337620 | 0.229874   | 0.192992 | 1.52E-07 | 5          | Intergenic          |
| cg23345038 | 0.90569    | 0.918951 | 3.30E-07 | 14         | Body                |
| cg23347273 | 0.025588   | 0.019502 | 2.50E-08 | 19         | Body                |
| cg23347400 | 0.110156   | 0.129157 | 4.27E-07 | 11         | Promoter-associated |
| cg23347987 | 0.075869   | 0.060987 | 7.60E-08 | 14         | 5'UTR               |
| cg23355997 | 0.663853   | 0.59226  | 1.00E-09 | 17         | Body                |
| cg23370170 | 0.221555   | 0.254977 | 1.20E-08 | 4          | Intergenic          |
| cg23375783 | 0.106804   | 0.078985 | 4.40E-08 | 17         | Promoter-associated |
| cg23381116 | 0.122261   | 0.138055 | 1.93E-07 | 14         | Promoter-associated |
| cg23429981 | 0.107471   | 0.087536 | 4.64E-07 | 6          | Promoter-associated |
| cg23455456 | 0.326972   | 0.392959 | 9.00E-09 | 11         | Intergenic          |
| cg23460847 | 0.480814   | 0.412935 | 3.00E-09 | 2          | Intergenic          |
| cg23464698 | 0.137699   | 0.164594 | 1.92E-07 | 14         | Body                |
| cg23468878 | 0.205006   | 0.251821 | 2.42E-07 | 3          | Body                |
| cg23469230 | 0.795901   | 0.832297 | 8.10E-08 | 3          | Body                |
| cg23475963 | 0.128467   | 0.148247 | 8.00E-09 | 7          | Promoter-associated |
| cg23492413 | 0.268909   | 0.210405 | 0.00E+00 | 10         | Body                |
| cg23495556 | 0.043727   | 0.033392 | 1.39E-07 | 7          | Promoter-associated |
| cg23506313 | 0.435768   | 0.371703 | 2.00E-09 | 5          | Intergenic          |
| cg23513567 | 0.10165    | 0.077718 | 2.00E-09 | 17         | Body                |
| cg23515556 | 0.779381   | 0.808919 | 4.10E-08 | 10         | Body                |
| cg23516463 | 0.039642   | 0.023808 | 3.00E-09 | 10         | Intergenic          |
| cg23517279 | 0.28949    | 0.226056 | 4.00E-09 | 6          | Promoter-associated |
| cg23528168 | 0.046281   | 0.039463 | 1.64E-07 | 5          | Body                |
| cg23540748 | 0.07133    | 0.056398 | 4.96E-07 | 19         | Promoter-associated |
| cg23548487 | 0.126439   | 0.147109 | 2.31E-07 | 19         | Promoter-associated |
| cg23571812 | 0.061795   | 0.041763 | 6.00E-09 | 14         | Body                |
| cg23572459 | 0.087916   | 0.100857 | 1.15E-07 | 4          | Body                |
| cg23586394 | 0.117546   | 0.085112 | 4.20E-08 | 17         | Promoter-associated |



| lluminaID  | Maltreated | Control  | p-value  | Chromosome | CpG site location   |
|------------|------------|----------|----------|------------|---------------------|
| cg23594951 | 0.089743   | 0.065391 | 5.00E-08 | 11         | Body                |
| cg23601614 | 0.06879    | 0.054328 | 2.19E-07 | 2          | Promoter-associated |
| cg23642587 | 0.060724   | 0.051417 | 3.86E-07 | 17         | Promoter-associated |
| cg23646337 | 0.168683   | 0.142821 | 4.68E-07 | 19         | Body                |
| cg23653389 | 0.067894   | 0.053793 | 4.59E-07 | 10         | Body                |
| cg23654431 | 0.111875   | 0.133709 | 1.67E-07 | 12         | Promoter-associated |
| cg23657834 | 0.847347   | 0.872822 | 1.00E-08 | 3          | Intergenic          |
| cg23665973 | 0.06843    | 0.053602 | 4.70E-08 | 2          | Body                |
| cg23680255 | 0.131238   | 0.148969 | 4.40E-07 | 2          | Promoter-associated |
| cg23713156 | 0.207266   | 0.123586 | 5.00E-09 | 17         | Promoter-associated |
| cg23715700 | 0.119337   | 0.139675 | 1.20E-08 | 19         | Promoter-associated |
| cg23733029 | 0.871959   | 0.840628 | 2.10E-08 | 15         | Body                |
| cg23738353 | 0.39671    | 0.293596 | 1.00E-09 | 7          | Body                |
| cg23743606 | 0.657313   | 0.612589 | 4.10E-08 | 11         | Body                |
| cg23797839 | 0.162601   | 0.137589 | 4.46E-07 | 10         | Promoter-associated |
| cg23817347 | 0.077491   | 0.058799 | 1.62E-07 | 20         | Body                |
| cg23817779 | 0.031425   | 0.023536 | 2.60E-08 | 6          | Body                |
| cg23836594 | 0.194434   | 0.163577 | 1.02E-07 | 17         | Body                |
| cg23837253 | 0.113662   | 0.088708 | 2.31E-07 | 19         | Promoter-associated |
| cg23847381 | 0.038775   | 0.032557 | 1.48E-07 | 18         | Body                |
| cg23850899 | 0.069076   | 0.054527 | 6.30E-08 | 11         | 5'UTR               |
| cg23870762 | 0.093643   | 0.107676 | 3.00E-08 | 7          | Intergenic          |
| cg23888375 | 0.283706   | 0.220289 | 4.83E-07 | 2          | Body                |
| cg23890506 | 0.052643   | 0.041484 | 1.80E-07 | 1          | Body                |
| cg23914146 | 0.160458   | 0.183648 | 4.63E-07 | 18         | Body                |
| cg23925199 | 0.699394   | 0.738157 | 7.00E-09 | 1          | Body                |
| cg23937816 | 0.157523   | 0.175753 | 4.19E-07 | 8          | Intergenic          |
| cg23954724 | 0.78335    | 0.809318 | 5.60E-08 | 6          | Body                |
| cg23959187 | 0.173867   | 0.199479 | 2.44E-07 | 17         | Intergenic          |
| cg23965061 | 0.028243   | 0.019886 | 0.00E+00 | 8          | 5'UTR               |
| cg23967544 | 0.107584   | 0.079676 | 4.85E-07 | 5          | Intergenic          |
| cg23978504 | 0.051102   | 0.040837 | 9.10E-08 | 3          | Body                |
| cg24022402 | 0.102921   | 0.118897 | 1.93E-07 | 3          | Body                |
| cg24023618 | 0.123715   | 0.145792 | 1.10E-08 | 6          | Promoter-associated |
| cg24024056 | 0.044728   | 0.035802 | 2.83E-07 | 10         | Intergenic          |
| cg24025893 | 0.214256   | 0.175457 | 3.70E-08 | 10         | Body                |
| cg24026549 | 0.042987   | 0.036219 | 5.50E-08 | 4          | Promoter-associated |
| cg24031277 | 0.04611    | 0.032318 | 1.20E-07 | 7          | Body                |
| cg24032568 | 0.710417   | 0.579281 | 3.10E-08 | 10         | Body                |
| cg24034412 | 0.093249   | 0.065491 | 3.95E-07 | 19         | Promoter-associated |
| cg24039631 | 0.147415   | 0.116028 | 1.76E-07 | 19         | Promoter-associated |
| cg24051456 | 0.16202    | 0.11254  | 8.20E-08 | 10         | Promoter-associated |
| cg24053610 | 0.099541   | 0.114316 | 2.62E-07 | 10         | Promoter-associated |
| cg24053721 | 0.161652   | 0.190823 | 4.00E-09 | 4          | Body                |
| cg24054272 | 0.245994   | 0.195451 | 5.00E-09 | 1          | Promoter-associated |
| cg24062536 | 0.76271    | 0.800215 | 0.00E+00 | 5          | 3'UTR               |
| cg24073122 | 0.088428   | 0.064677 | 2.20E-08 | 1          | Body                |
| cg24076399 | 0.027168   | 0.018865 | 1.50E-08 | 20         | Body                |
| cg24105797 | 0.096283   | 0.112499 | 1.50E-08 | 17         | Promoter-associated |
| cg24111516 | 0.140298   | 0.161616 | 3.00E-09 | 14         | 5'UTR               |
| cg24124977 | 0.135438   | 0.163886 | 4.00E-09 | 17         | Body                |
| cg24134935 | 0.078854   | 0.055449 | 3.60E-08 | 11         | Body                |
| cg24151027 | 0.041874   | 0.033355 | 2.00E-09 | 5          | Promoter-associated |

| lluminalID | Maltreated | Control  | p-value  | Chromosome | CpG site location   |
|------------|------------|----------|----------|------------|---------------------|
| cg24158452 | 0.040174   | 0.031478 | 2.00E-09 | 17         | Promoter-associated |
| cg24168641 | 0.083414   | 0.05937  | 3.19E-07 | 15         | Body                |
| cg24185443 | 0.172755   | 0.189773 | 4.83E-07 | 19         | Body                |
| cg24200083 | 0.230899   | 0.154673 | 1.00E-09 | 22         | Promoter-associated |
| cg24209723 | 0.653703   | 0.714066 | 0.00E+00 | 18         | Intergenic          |
| cg24212420 | 0.141336   | 0.16633  | 6.30E-08 | 19         | Promoter-associated |
| cg24218109 | 0.072675   | 0.053261 | 9.90E-08 | 6          | Body                |
| cg24220279 | 0.061233   | 0.050117 | 1.67E-07 | 10         | Intergenic          |
| cg24229963 | 0.079312   | 0.095283 | 2.40E-08 | 8          | Body                |
| cg24231854 | 0.157817   | 0.128133 | 1.04E-07 | 2          | Intergenic          |
| cg24243429 | 0.114143   | 0.129403 | 1.02E-07 | 4          | Body                |
| cg24253367 | 0.65558    | 0.691182 | 2.10E-08 | 17         | Body                |
| cg24262715 | 0.437146   | 0.378083 | 4.30E-08 | 15         | Promoter-associated |
| cg24269276 | 0.093971   | 0.10796  | 5.00E-08 | 17         | Body                |
| cg24272309 | 0.296924   | 0.368948 | 1.33E-07 | 10         | Promoter-associated |
| cg24277128 | 0.183286   | 0.205065 | 3.61E-07 | 6          | Body                |
| cg24280607 | 0.249403   | 0.20513  | 2.20E-08 | 15         | Promoter-associated |
| cg24291203 | 0.102775   | 0.12914  | 1.34E-07 | 8          | Body                |
| cg24293614 | 0.219234   | 0.180424 | 3.80E-08 | 22         | Body                |
| cg24301620 | 0.150392   | 0.119441 | 1.27E-07 | 6          | Body                |
| cg24326830 | 0.06919    | 0.056215 | 3.10E-07 | 15         | Intergenic          |
| cg24337310 | 0.734603   | 0.776112 | 1.00E-09 | 10         | Intergenic          |
| cg24363298 | 0.10308    | 0.082262 | 1.50E-08 | 3          | Body                |
| cg24377340 | 0.699606   | 0.738138 | 5.90E-08 | 3          | Intergenic          |
| cg24440302 | 0.055527   | 0.036581 | 3.26E-07 | 11         | Body                |
| cg24451074 | 0.090365   | 0.106316 | 3.40E-08 | 3          | Promoter-associated |
| cg24451422 | 0.075923   | 0.057551 | 5.20E-08 | 1          | Body                |
| cg24480577 | 0.101708   | 0.074452 | 2.69E-07 | 20         | Body                |
| cg24482288 | 0.872885   | 0.892487 | 3.47E-07 | 19         | Body                |
| cg24483304 | 0.1081     | 0.127974 | 1.00E-08 | 1          | Body                |
| cg24498488 | 0.738262   | 0.691275 | 3.70E-08 | 1          | Intergenic          |
| cg24505778 | 0.654975   | 0.611777 | 1.20E-08 | 6          | Intergenic          |
| cg24530787 | 0.08503    | 0.060794 | 1.26E-07 | X          | 5'UTR               |
| cg24534731 | 0.69778    | 0.756069 | 0.00E+00 | 17         | Body                |
| cg24541426 | 0.090787   | 0.071489 | 1.07E-07 | 2          | 5'UTR               |
| cg24577766 | 0.108632   | 0.129781 | 3.13E-07 | 5          | Promoter-associated |
| cg24582500 | 0.167445   | 0.104773 | 0.00E+00 | 10         | Promoter-associated |
| cg24582925 | 0.811079   | 0.836897 | 1.70E-08 | 17         | Body                |
| cg24588137 | 0.860861   | 0.885127 | 7.00E-09 | 4          | Intergenic          |
| cg24617363 | 0.030483   | 0.024041 | 2.38E-07 | 6          | Body                |
| cg24620463 | 0.438313   | 0.40022  | 6.40E-08 | 7          | Body                |
| cg24624624 | 0.238498   | 0.170426 | 1.00E-09 | 11         | Promoter-associated |
| cg24625240 | 0.169068   | 0.195043 | 5.00E-08 | 11         | Body                |
| cg24630419 | 0.090863   | 0.072094 | 6.00E-09 | 1          | Body                |
| cg24652842 | 0.395049   | 0.353875 | 1.55E-07 | 15         | Intergenic          |
| cg24695828 | 0.155744   | 0.177487 | 1.98E-07 | 19         | 5'UTR               |
| cg24695972 | 0.155066   | 0.13048  | 1.26E-07 | 1          | Body                |
| cg24698536 | 0.260029   | 0.327341 | 1.93E-07 | 12         | Promoter-associated |
| cg24703941 | 0.070004   | 0.059466 | 5.10E-08 | 19         | Body                |
| cg24704123 | 0.170982   | 0.150512 | 1.00E-09 | 18         | Body                |
| cg24704562 | 0.025096   | 0.019751 | 1.29E-07 | 21         | Promoter-associated |
| cg24708831 | 0.058022   | 0.049181 | 2.87E-07 | 14         | Promoter-associated |
| cg24710480 | 0.182036   | 0.250035 | 3.73E-07 | 6          | Promoter-associated |

| lluminalID | Maltreated | Control  | p-value  | Chromosome | CpG site location   |
|------------|------------|----------|----------|------------|---------------------|
| cg24715473 | 0.198478   | 0.220643 | 1.37E-07 | 16         | Promoter-associated |
| cg24720672 | 0.038895   | 0.032116 | 4.70E-08 | 15         | Promoter-associated |
| cg24728468 | 0.159845   | 0.09854  | 0.00E+00 | 8          | Promoter-associated |
| cg24759101 | 0.404232   | 0.360207 | 8.00E-08 | 19         | Intergenic          |
| cg24773676 | 0.04171    | 0.033171 | 4.41E-07 | 11         | Body                |
| cg24794206 | 0.131319   | 0.150559 | 4.61E-07 | 6          | Intergenic          |
| cg24799710 | 0.275473   | 0.216033 | 1.00E-09 | 5          | 5'UTR               |
| cg24800130 | 0.424665   | 0.331203 | 0.00E+00 | 19         | 5'UTR               |
| cg24808674 | 0.121212   | 0.139827 | 1.49E-07 | 1          | Body                |
| cg24822001 | 0.030079   | 0.022289 | 1.00E-08 | 3          | Promoter-associated |
| cg24829313 | 0.278448   | 0.231618 | 1.42E-07 | 11         | Body                |
| cg24839718 | 0.236237   | 0.276087 | 2.60E-08 | 19         | Promoter-associated |
| cg24845578 | 0.282591   | 0.205835 | 3.75E-07 | 5          | Intergenic          |
| cg24862627 | 0.144127   | 0.166018 | 3.14E-07 | 7          | Body                |
| cg24866538 | 0.031873   | 0.025075 | 1.70E-08 | 6          | Promoter-associated |
| cg24871371 | 0.778834   | 0.732806 | 1.28E-07 | 6          | Intergenic          |
| cg24877792 | 0.203601   | 0.165168 | 8.70E-08 | 5          | Promoter-associated |
| cg24883413 | 0.817677   | 0.852452 | 3.35E-07 | 12         | 3'UTR               |
| cg24901609 | 0.725032   | 0.778271 | 0.00E+00 | 1          | Intergenic          |
| cg24924731 | 0.606415   | 0.582632 | 8.50E-08 | 20         | Body                |
| cg24938881 | 0.418647   | 0.371966 | 2.90E-08 | 2          | Intergenic          |
| cg24962573 | 0.055765   | 0.044135 | 1.12E-07 | 22         | Body                |
| cg24963443 | 0.191686   | 0.156135 | 1.18E-07 | 5          | Intergenic          |
| cg24974737 | 0.255374   | 0.193938 | 5.50E-08 | 17         | Intergenic          |
| cg24975666 | 0.036884   | 0.026074 | 3.29E-07 | 17         | Body                |
| cg25038060 | 0.056082   | 0.044107 | 4.18E-07 | 17         | Promoter-associated |
| cg25042586 | 0.805308   | 0.831901 | 3.00E-09 | 7          | Body                |
| cg25048357 | 0.054365   | 0.043369 | 1.76E-07 | 11         | Promoter-associated |
| cg25083781 | 0.131394   | 0.149464 | 3.89E-07 | 20         | Body                |
| cg25089685 | 0.877871   | 0.906716 | 0.00E+00 | 6          | Body                |
| cg25091074 | 0.144548   | 0.169902 | 6.70E-08 | 4          | Intergenic          |
| cg25094927 | 0.091357   | 0.108398 | 1.90E-08 | 22         | Promoter-associated |
| cg25103766 | 0.126115   | 0.090085 | 3.01E-07 | 1          | Body                |
| cg25136955 | 0.821972   | 0.854176 | 0.00E+00 | 12         | Intergenic          |
| cg25141417 | 0.165209   | 0.196546 | 3.40E-08 | 1          | Intergenic          |
| cg25183282 | 0.138071   | 0.156707 | 1.29E-07 | 2          | Intergenic          |
| cg25215340 | 0.130361   | 0.149599 | 6.60E-08 | 11         | Body                |
| cg25223263 | 0.145423   | 0.109117 | 4.30E-08 | 11         | Body                |
| cg25223716 | 0.731328   | 0.584385 | 2.80E-07 | 10         | Body                |
| cg25231972 | 0.149988   | 0.119796 | 2.32E-07 | 10         | Body                |
| cg25237692 | 0.076647   | 0.056448 | 7.80E-08 | 15         | Intergenic          |
| cg25241102 | 0.331646   | 0.397823 | 9.00E-09 | 2          | Body                |
| cg25262396 | 0.039856   | 0.03146  | 3.11E-07 | 11         | Promoter-associated |
| cg25263898 | 0.795155   | 0.824281 | 3.50E-08 | 1          | Body                |
| cg25270498 | 0.271076   | 0.210339 | 1.80E-07 | 17         | Promoter-associated |
| cg25280040 | 0.74866    | 0.774088 | 4.70E-08 | 11         | Intergenic          |
| cg25296343 | 0.192018   | 0.226705 | 1.86E-07 | 19         | 5'UTR               |
| cg25299750 | 0.119312   | 0.067703 | 3.00E-09 | 6          | 5'UTR               |
| cg25313172 | 0.097866   | 0.071077 | 1.32E-07 | 12         | Body                |
| cg25325192 | 0.570277   | 0.513655 | 4.56E-07 | 4          | Body                |
| cg25364049 | 0.382411   | 0.325222 | 2.00E-09 | X          | 5'UTR               |
| cg25365934 | 0.095592   | 0.067046 | 1.66E-07 | 10         | Intergenic          |
| cg25388447 | 0.24575    | 0.305821 | 4.00E-09 | 19         | Intergenic          |

| IlluminaID | Maltreated | Control  | p-value  | Chromosome | CpG site location   |
|------------|------------|----------|----------|------------|---------------------|
| cg25403152 | 0.101238   | 0.075355 | 8.30E-08 | 8          | Body                |
| cg25424194 | 0.704999   | 0.754795 | 5.20E-08 | 19         | 5'UTR               |
| cg25428293 | 0.106984   | 0.121864 | 3.50E-07 | 5          | Body                |
| cg25431220 | 0.055394   | 0.045067 | 2.95E-07 | 17         | Body                |
| cg25439496 | 0.106627   | 0.089569 | 2.35E-07 | 6          | Intergenic          |
| cg25441200 | 0.109985   | 0.124699 | 8.00E-09 | 7          | Promoter-associated |
| cg25446197 | 0.036896   | 0.025402 | 4.50E-08 | 4          | Promoter-associated |
| cg25454755 | 0.07187    | 0.082901 | 2.67E-07 | 9          | 5'UTR               |
| cg25515776 | 0.726862   | 0.759056 | 0.00E+00 | 8          | Body                |
| cg25526061 | 0.096714   | 0.068902 | 3.50E-08 | 10         | Body                |
| cg25538450 | 0.20751    | 0.147074 | 0.00E+00 | 19         | Body                |
| cg25542337 | 0.281641   | 0.220163 | 0.00E+00 | 7          | Body                |
| cg25568066 | 0.107263   | 0.082226 | 1.40E-08 | 5          | Intergenic          |
| cg25593560 | 0.080073   | 0.042229 | 3.28E-07 | 19         | Body                |
| cg25605045 | 0.138009   | 0.16486  | 3.90E-08 | 2          | Promoter-associated |
| cg25668236 | 0.054521   | 0.042131 | 3.71E-07 | 5          | Body                |
| cg25694979 | 0.104703   | 0.079741 | 3.50E-08 | 15         | Body                |
| cg25731347 | 0.472811   | 0.4136   | 0.00E+00 | 7          | Body                |
| cg25754755 | 0.245548   | 0.311863 | 1.48E-07 | 2          | 5'UTR               |
| cg25759457 | 0.1028     | 0.119173 | 9.00E-09 | 1          | 5'UTR               |
| cg25767345 | 0.224124   | 0.18904  | 1.22E-07 | 18         | Intergenic          |
| cg25783173 | 0.052704   | 0.042964 | 6.00E-09 | 3          | 5'UTR               |
| cg25783315 | 0.879213   | 0.893402 | 4.00E-09 | 19         | 5'UTR               |
| cg25802430 | 0.106609   | 0.085987 | 3.89E-07 | 2          | Promoter-associated |
| cg25804018 | 0.061571   | 0.049717 | 3.30E-08 | 8          | Body                |
| cg25820703 | 0.41325    | 0.342123 | 2.06E-07 | 19         | Body                |
| cg25820971 | 0.17448    | 0.144796 | 2.08E-07 | 14         | Promoter-associated |
| cg25823578 | 0.125472   | 0.141307 | 2.40E-07 | 14         | Body                |
| cg25824760 | 0.306287   | 0.240484 | 2.00E-09 | 18         | Body                |
| cg25839687 | 0.075088   | 0.064689 | 4.41E-07 | 1          | 5'UTR               |
| cg25840850 | 0.145498   | 0.160001 | 3.57E-07 | 2          | Body                |
| cg25894440 | 0.437966   | 0.410612 | 5.90E-08 | 7          | Intergenic          |
| cg25922125 | 0.13589    | 0.164048 | 1.63E-07 | 7          | Promoter-associated |
| cg25923018 | 0.097109   | 0.111483 | 1.65E-07 | 1          | Body                |
| cg25926515 | 0.328307   | 0.260563 | 1.57E-07 | 10         | 5'UTR               |
| cg25935897 | 0.788443   | 0.812761 | 2.30E-08 | 4          | Intergenic          |
| cg25946722 | 0.357765   | 0.293575 | 2.03E-07 | 6          | Promoter-associated |
| cg25954627 | 0.10657    | 0.081419 | 3.77E-07 | 10         | Intergenic          |
| cg25956062 | 0.789094   | 0.830042 | 5.00E-09 | 11         | Intergenic          |
| cg25964040 | 0.276717   | 0.238796 | 6.50E-08 | 3          | Promoter-associated |
| cg25974586 | 0.16132    | 0.186285 | 1.90E-08 | 20         | Body                |
| cg25989075 | 0.333517   | 0.39392  | 1.97E-07 | 6          | Body                |
| cg25995724 | 0.240008   | 0.146586 | 3.00E-09 | 8          | Promoter-associated |
| cg26022015 | 0.091963   | 0.069103 | 4.70E-07 | 13         | Body                |
| cg26029736 | 0.069286   | 0.055338 | 4.33E-07 | 2          | Intergenic          |
| cg26035323 | 0.086484   | 0.062192 | 1.60E-08 | 1          | 5'UTR               |
| cg26055950 | 0.395792   | 0.320981 | 2.64E-07 | 1          | Body                |
| cg26061548 | 0.078362   | 0.055506 | 3.01E-07 | 3          | Body                |
| cg26090660 | 0.853677   | 0.872749 | 2.90E-08 | 4          | Body                |
| cg26111184 | 0.101123   | 0.081005 | 1.10E-08 | 2          | Promoter-associated |
| cg26111900 | 0.398725   | 0.380894 | 2.60E-07 | 10         | Intergenic          |
| cg26129545 | 0.090137   | 0.057106 | 4.07E-07 | 5          | Body                |
| cg26131754 | 0.045611   | 0.0347   | 3.20E-08 | 3          | Promoter-associated |

| lluminalID | Maltreated | Control  | p-value  | Chromosome | CpG site location   |
|------------|------------|----------|----------|------------|---------------------|
| cg26161329 | 0.073116   | 0.0561   | 2.38E-07 | 17         | Body                |
| cg26167861 | 0.346151   | 0.296256 | 3.54E-07 | 12         | Promoter-associated |
| cg26221423 | 0.1308     | 0.154514 | 2.75E-07 | 11         | Intergenic          |
| cg26223654 | 0.223282   | 0.171116 | 3.48E-07 | 19         | 5'UTR               |
| cg26224915 | 0.099923   | 0.071364 | 8.00E-08 | 11         | Body                |
| cg26251429 | 0.128154   | 0.088659 | 2.79E-07 | 2          | Body                |
| cg26258330 | 0.115408   | 0.133403 | 3.64E-07 | 8          | Body                |
| cg26260386 | 0.084276   | 0.09751  | 7.00E-09 | 4          | Body                |
| cg26270411 | 0.171816   | 0.153363 | 3.90E-08 | 20         | Promoter-associated |
| cg26276650 | 0.199875   | 0.160971 | 1.65E-07 | 2          | Body                |
| cg26291818 | 0.089374   | 0.0646   | 0.00E+00 | 8          | Promoter-associated |
| cg26298281 | 0.152659   | 0.17224  | 2.07E-07 | 4          | Body                |
| cg26301389 | 0.049577   | 0.037405 | 0.00E+00 | 5          | 5'UTR               |
| cg26306256 | 0.146354   | 0.169245 | 4.00E-09 | 19         | Promoter-associated |
| cg26307926 | 0.081791   | 0.060691 | 1.00E-09 | 2          | Intergenic          |
| cg26333591 | 0.123963   | 0.147169 | 8.00E-08 | 2          | Promoter-associated |
| cg26339180 | 0.476081   | 0.405639 | 2.70E-08 | 20         | Promoter-associated |
| cg26342985 | 0.726678   | 0.777516 | 2.39E-07 | 2          | Intergenic          |
| cg26346636 | 0.176713   | 0.139519 | 3.48E-07 | X          | Intergenic          |
| cg26366304 | 0.047866   | 0.030074 | 2.10E-08 | 1          | Promoter-associated |
| cg26371787 | 0.04665    | 0.035225 | 3.80E-08 | 6          | Body                |
| cg26376157 | 0.094512   | 0.077556 | 1.27E-07 | 2          | Promoter-associated |
| cg26383454 | 0.750601   | 0.784776 | 2.12E-07 | 6          | Body                |
| cg26383468 | 0.891214   | 0.909718 | 0.00E+00 | 10         | Body                |
| cg26399035 | 0.748318   | 0.799839 | 0.00E+00 | 16         | Body                |
| cg26399201 | 0.119424   | 0.104953 | 1.00E-09 | 5          | Body                |
| cg26422674 | 0.162439   | 0.116862 | 1.70E-08 | 12         | Body                |
| cg26425045 | 0.299725   | 0.249804 | 1.82E-07 | 10         | Intergenic          |
| cg26425305 | 0.294121   | 0.237437 | 1.59E-07 | 5          | Intergenic          |
| cg26434548 | 0.089165   | 0.063772 | 2.60E-07 | 7          | Promoter-associated |
| cg26438672 | 0.795217   | 0.763248 | 4.24E-07 | 8          | Body                |
| cg26465331 | 0.928037   | 0.942602 | 2.77E-07 | 17         | Body                |
| cg26475369 | 0.713601   | 0.639137 | 7.00E-09 | 6          | Body                |
| cg26478249 | 0.089941   | 0.103049 | 1.98E-07 | 17         | 5'UTR               |
| cg26488985 | 0.864968   | 0.891395 | 3.00E-09 | 16         | Body                |
| cg26492712 | 0.17841    | 0.14996  | 1.84E-07 | 21         | Body                |
| cg26496372 | 0.098129   | 0.114232 | 1.90E-08 | 5          | Promoter-associated |
| cg26500801 | 0.027904   | 0.02162  | 3.00E-09 | 19         | Promoter-associated |
| cg26503153 | 0.131499   | 0.10389  | 2.00E-08 | 13         | Body                |
| cg26505663 | 0.197337   | 0.155292 | 8.50E-08 | 15         | Body                |
| cg26514337 | 0.109416   | 0.078943 | 2.00E-08 | 18         | Promoter-associated |
| cg26516882 | 0.422734   | 0.367961 | 1.48E-07 | X          | Intergenic          |
| cg26529833 | 0.08342    | 0.06081  | 1.40E-08 | 12         | Promoter-associated |
| cg26534993 | 0.746008   | 0.777009 | 2.00E-09 | 2          | Body                |
| cg26541649 | 0.378052   | 0.291762 | 2.25E-07 | 1          | Intergenic          |
| cg26542412 | 0.230488   | 0.299625 | 1.71E-07 | 1          | 5'UTR               |
| cg26560732 | 0.70192    | 0.656933 | 2.60E-08 | 12         | Body                |
| cg26590079 | 0.909842   | 0.886255 | 2.10E-07 | 6          | Intergenic          |
| cg26618056 | 0.073341   | 0.051347 | 3.31E-07 | 16         | Intergenic          |
| cg26620710 | 0.114138   | 0.084568 | 1.00E-09 | 5          | Intergenic          |
| cg26628795 | 0.120572   | 0.090895 | 2.10E-08 | 2          | Promoter-associated |
| cg26631144 | 0.139921   | 0.092302 | 3.00E-08 | 8          | 5'UTR               |
| cg26639561 | 0.066041   | 0.053175 | 4.80E-07 | 12         | Body                |

| lluminalID | Maltreated | Control  | p-value  | Chromosome | CpG site location   |
|------------|------------|----------|----------|------------|---------------------|
| cg26639666 | 0.336792   | 0.276655 | 9.00E-09 | 16         | Body                |
| cg26670485 | 0.04147    | 0.03436  | 1.70E-08 | 1          | Promoter-associated |
| cg26675410 | 0.574305   | 0.551924 | 8.40E-08 | 5          | Body                |
| cg26700716 | 0.207891   | 0.153511 | 8.60E-08 | 2          | Body                |
| cg26705930 | 0.215651   | 0.146473 | 3.30E-08 | 15         | Promoter-associated |
| cg26706201 | 0.055083   | 0.044898 | 0.00E+00 | 11         | Promoter-associated |
| cg26714410 | 0.135885   | 0.153748 | 2.00E-09 | 13         | Body                |
| cg26726589 | 0.209581   | 0.169797 | 1.00E-09 | 20         | Promoter-associated |
| cg26732930 | 0.182306   | 0.206921 | 4.32E-07 | 15         | Intergenic          |
| cg26735846 | 0.120396   | 0.090079 | 1.00E-09 | 10         | Body                |
| cg26742995 | 0.1071     | 0.086702 | 4.50E-08 | 17         | Body                |
| cg26743569 | 0.099355   | 0.117037 | 1.60E-08 | 2          | Promoter-associated |
| cg26747885 | 0.068026   | 0.05185  | 3.28E-07 | 17         | 5'UTR               |
| cg26758863 | 0.102455   | 0.118656 | 8.40E-08 | 19         | 5'UTR               |
| cg26816438 | 0.153645   | 0.116863 | 4.40E-08 | 1          | Promoter-associated |
| cg26816907 | 0.253045   | 0.202729 | 4.35E-07 | 1          | Body                |
| cg26823989 | 0.137372   | 0.109721 | 3.40E-08 | 1          | Body                |
| cg26826004 | 0.336372   | 0.386122 | 8.20E-08 | 5          | Body                |
| cg26827373 | 0.072913   | 0.05451  | 3.07E-07 | 19         | Promoter-associated |
| cg26833273 | 0.780047   | 0.751069 | 2.19E-07 | 5          | Intergenic          |
| cg26852971 | 0.047742   | 0.039389 | 4.33E-07 | 16         | Intergenic          |
| cg26853048 | 0.056406   | 0.037335 | 0.00E+00 | 5          | Promoter-associated |
| cg26864130 | 0.092782   | 0.067315 | 2.32E-07 | 11         | Body                |
| cg26869604 | 0.155577   | 0.171461 | 7.00E-08 | 10         | Body                |
| cg26871885 | 0.092658   | 0.060294 | 2.06E-07 | 11         | Body                |
| cg26894523 | 0.033069   | 0.026285 | 1.42E-07 | 4          | Body                |
| cg26912688 | 0.122709   | 0.139992 | 1.00E-09 | 1          | Promoter-associated |
| cg26918957 | 0.17724    | 0.13731  | 0.00E+00 | 8          | Body                |
| cg26923014 | 0.717831   | 0.778204 | 2.15E-07 | 16         | Intergenic          |
| cg26929161 | 0.796306   | 0.847132 | 3.47E-07 | 20         | Body                |
| cg26942392 | 0.263541   | 0.191137 | 5.80E-08 | 20         | Promoter-associated |
| cg26946803 | 0.777171   | 0.811473 | 1.89E-07 | 6          | Intergenic          |
| cg26952796 | 0.168027   | 0.133928 | 4.45E-07 | 19         | Intergenic          |
| cg26957370 | 0.103258   | 0.119708 | 7.90E-08 | 1          | Promoter-associated |
| cg26983991 | 0.868533   | 0.887284 | 2.37E-07 | 17         | Intergenic          |
| cg26987697 | 0.20354    | 0.165547 | 3.10E-08 | 4          | Promoter-associated |
| cg26989898 | 0.844056   | 0.881317 | 0.00E+00 | 7          | Body                |
| cg27010645 | 0.154673   | 0.172127 | 4.80E-08 | 5          | Body                |
| cg27015499 | 0.906839   | 0.889814 | 5.10E-08 | 3          | Intergenic          |
| cg27035087 | 0.371637   | 0.321375 | 3.08E-07 | 6          | Intergenic          |
| cg27056436 | 0.211542   | 0.188663 | 7.00E-09 | 7          | Promoter-associated |
| cg27079446 | 0.064802   | 0.04076  | 4.90E-08 | 18         | 5'UTR               |
| cg27090062 | 0.090807   | 0.066779 | 2.46E-07 | 5          | Intergenic          |
| cg27105890 | 0.508037   | 0.47843  | 5.00E-09 | 16         | Body                |
| cg27123691 | 0.13193    | 0.110848 | 1.01E-07 | 15         | Body                |
| cg27138951 | 0.376655   | 0.285224 | 0.00E+00 | 20         | Body                |
| cg27139064 | 0.881411   | 0.897467 | 1.11E-07 | 7          | Intergenic          |
| cg27149388 | 0.082868   | 0.059882 | 7.00E-09 | 12         | Body                |
| cg27167642 | 0.123335   | 0.143842 | 1.90E-08 | 13         | Intergenic          |
| cg27172057 | 0.092486   | 0.106331 | 1.75E-07 | 12         | Promoter-associated |
| cg27172150 | 0.309482   | 0.254731 | 4.24E-07 | 16         | 5'UTR               |
| cg27182764 | 0.105633   | 0.120916 | 2.77E-07 | 1          | Promoter-associated |
| cg27192892 | 0.68772    | 0.707045 | 4.38E-07 | 7          | Intergenic          |

| IlluminaID | Maltreated | Control  | p-value  | Chromosome | CpG site location   |
|------------|------------|----------|----------|------------|---------------------|
| cg27204544 | 0.247364   | 0.188438 | 6.00E-09 | 7          | Promoter-associated |
| cg27205941 | 0.245765   | 0.183282 | 1.00E-09 | 6          | Promoter-associated |
| cg27226861 | 0.065689   | 0.049637 | 9.20E-08 | 4          | Body                |
| cg27235725 | 0.815765   | 0.755973 | 2.72E-07 | 11         | Intergenic          |
| cg27237272 | 0.800606   | 0.820493 | 2.36E-07 | 11         | Intergenic          |
| cg27250180 | 0.885529   | 0.828257 | 1.32E-07 | 21         | Intergenic          |
| cg27271242 | 0.53746    | 0.503111 | 4.70E-08 | 6          | Promoter-associated |
| cg27280366 | 0.164792   | 0.189479 | 1.00E-09 | 12         | Intergenic          |
| cg27286863 | 0.402765   | 0.347377 | 6.60E-08 | X          | Body                |
| cg27289306 | 0.752269   | 0.709728 | 4.00E-09 | 7          | Intergenic          |
| cg27290624 | 0.122228   | 0.079002 | 1.13E-07 | 3          | Intergenic          |
| cg27299616 | 0.577523   | 0.633106 | 7.40E-08 | 14         | Promoter-associated |
| cg27308707 | 0.069491   | 0.04673  | 6.40E-08 | 10         | Promoter-associated |
| cg27308967 | 0.673797   | 0.641674 | 0.00E+00 | 6          | Body                |
| cg27326469 | 0.076319   | 0.066573 | 2.56E-07 | 22         | Body                |
| cg27337803 | 0.212058   | 0.184219 | 3.06E-07 | 16         | Promoter-associated |
| cg27343303 | 0.15538    | 0.174506 | 1.10E-08 | 11         | Intergenic          |
| cg27347434 | 0.21198    | 0.258683 | 2.00E-09 | 3          | Promoter-associated |
| cg27350602 | 0.301946   | 0.256065 | 3.20E-08 | X          | Intergenic          |
| cg27352639 | 0.063073   | 0.052147 | 3.84E-07 | 5          | Body                |
| cg27361716 | 0.128261   | 0.151917 | 7.40E-08 | 2          | Body                |
| cg27375561 | 0.744523   | 0.782205 | 2.00E-09 | 7          | Body                |
| cg27380788 | 0.048417   | 0.040504 | 3.50E-08 | 16         | Body                |
| cg27383216 | 0.831126   | 0.861752 | 2.45E-07 | 10         | Intergenic          |
| cg27407707 | 0.167111   | 0.194531 | 1.00E-09 | 16         | Promoter-associated |
| cg27442140 | 0.397086   | 0.366483 | 8.60E-08 | 1          | Promoter-associated |
| cg27474649 | 0.191378   | 0.23936  | 4.25E-07 | 7          | Body                |
| cg27478603 | 0.127548   | 0.085086 | 4.70E-08 | 17         | 3'UTR               |
| cg27486922 | 0.029102   | 0.02501  | 2.96E-07 | 16         | Promoter-associated |
| cg27493928 | 0.087455   | 0.074756 | 2.93E-07 | 7          | Body                |
| cg27495444 | 0.234758   | 0.177195 | 1.30E-07 | 19         | Promoter-associated |
| cg27496793 | 0.256648   | 0.210355 | 5.00E-09 | 2          | Body                |
| cg27510503 | 0.206275   | 0.150313 | 8.90E-08 | 22         | Intergenic          |
| cg27515255 | 0.145486   | 0.090812 | 1.00E-09 | 22         | Body                |
| cg27516940 | 0.030113   | 0.024161 | 4.94E-07 | 1          | Body                |
| cg27524515 | 0.059727   | 0.046877 | 1.75E-07 | 8          | 5'UTR               |
| cg27544219 | 0.093482   | 0.061054 | 8.50E-08 | 19         | Promoter-associated |
| cg27583038 | 0.155759   | 0.121551 | 1.56E-07 | 1          | Intergenic          |
| cg27583383 | 0.898544   | 0.917861 | 8.00E-09 | 20         | Body                |
| cg27589731 | 0.389695   | 0.467697 | 1.40E-08 | 1          | Body                |
| cg27595860 | 0.089578   | 0.071227 | 3.30E-07 | 8          | Body                |
| cg27598621 | 0.099639   | 0.112073 | 4.03E-07 | 11         | Body                |
| cg27618379 | 0.835121   | 0.852776 | 4.40E-08 | 4          | Body                |
| cg27642328 | 0.65432    | 0.70362  | 3.04E-07 | 11         | Body                |
| cg27642470 | 0.199192   | 0.132831 | 9.00E-09 | 6          | Body                |
| cg27650198 | 0.783814   | 0.80868  | 1.30E-07 | 12         | Intergenic          |
| cg27652249 | 0.783473   | 0.826341 | 7.00E-09 | 19         | Intergenic          |
| cg27654529 | 0.147275   | 0.194129 | 3.61E-07 | 19         | 5'UTR               |
| cg27657439 | 0.560687   | 0.479923 | 4.23E-07 | 13         | Intergenic          |
| cg27657525 | 0.10487    | 0.068979 | 3.10E-08 | 19         | Promoter-associated |
| cg27660038 | 0.182367   | 0.203952 | 2.50E-08 | 22         | Intergenic          |
| cg27665769 | 0.5331     | 0.452739 | 1.00E-09 | 4          | Promoter-associated |
| ch.1.17321 | 0.21684    | 0.280554 | 2.24E-07 | 1          | Intergenic          |

| lluminaID  | Maltreated | Control  | p-value  | Chromosome | CpG site location   |
|------------|------------|----------|----------|------------|---------------------|
| ch.11.3155 | 0.220123   | 0.312992 | 2.61E-07 | 11         | Intergenic          |
| ch.12.1962 | 0.231101   | 0.254377 | 4.37E-07 | 12         | Intergenic          |
| ch.15.1220 | 0.138269   | 0.22351  | 7.40E-08 | 15         | 5'UTR               |
| ch.19.2999 | 0.243237   | 0.325808 | 4.03E-07 | 19         | Body                |
| ch.2.21344 | 0.138279   | 0.189786 | 1.32E-07 | 2          | Promoter-associated |
| ch.22.1478 | 0.178141   | 0.24864  | 5.00E-08 | 22         | Body                |
| ch.3.33714 | 0.136537   | 0.193502 | 3.60E-07 | 3          | Body                |
| ch.6.29585 | 0.23496    | 0.293307 | 7.00E-09 | 6          | Body                |
| ch.7.12421 | 0.13493    | 0.193883 | 1.48E-07 | 7          | Intergenic          |
| ch.7.20867 | 0.217466   | 0.287538 | 1.15E-07 | 7          | Body                |
| ch.7.74733 | 0.121789   | 0.175456 | 2.20E-08 | 7          | Intergenic          |



## Appendix C

### Alphabetic listing of genes

| UCSC_RefGene_Name | # of noteworthy CpG sites |
|-------------------|---------------------------|
| AARSD1            | 1                         |
| AASDHPPT          | 1                         |
| ABCA2             | 1                         |
| ABCC3             | 1                         |
| ABCF1             | 1                         |
| ABCG4             | 1                         |
| ABHD10            | 1                         |
| ABHD11            | 1                         |
| ABHD13            | 1                         |
| ABHD5             | 1                         |
| ABL2              | 1                         |
| ABR               | 1                         |
| ACAD9             | 1                         |
| ACADSB            | 1                         |
| ACBD6             | 1                         |
| ACCN1             | 1                         |
| ACCN4             | 1                         |
| ACE               | 1                         |
| ACO2              | 1                         |
| ACOT9             | 1                         |
| ACRBP             | 1                         |
| ACTB              | 1                         |
| ACTR3             | 1                         |
| ACVR2A            | 1                         |
| ADAM1             | 1                         |
| ADAM12            | 1                         |
| ADAM15            | 1                         |
| ADAM2             | 1                         |
| ADAM22            | 1                         |
| ADAM8             | 1                         |
| ADAM9             | 1                         |
| ADAMTSL1          | 1                         |
| ADAMTSL4          | 1                         |
| ADARB2            | 2                         |
| ADAT2             | 1                         |
| ADCK2             | 1                         |
| ADCK5             | 1                         |
| ADRA1B            | 1                         |
| ADRA1D            | 1                         |
| ADRA2C            | 1                         |
| ADSS              | 1                         |
| ADSSL1            | 1                         |
| AEBP1             | 1                         |
| AES               | 1                         |
| AFARP1            | 1                         |
| AFMID             | 1                         |
| AGAP1             | 1                         |

| UCSC_RefGene_Name | # of noteworthy CpG sites |
|-------------------|---------------------------|
| AGAP6             | 1                         |
| AGGF1             | 1                         |
| AHCTF1            | 1                         |
| AHNAK             | 1                         |
| AIDA              | 1                         |
| AJAP1             | 1                         |
| AK3L1             | 1                         |
| AKAP1             | 1                         |
| AKAP13            | 1                         |
| AKAP13            | 1                         |
| AKD1              | 1                         |
| AKR1E2            | 2                         |
| AKR7A2            | 1                         |
| AKTIP             | 2                         |
| ALAS1             | 1                         |
| ALDH              | 1                         |
| ALDH1L1           | 1                         |
| ALDH3A2           | 1                         |
| ALDH9A1           | 1                         |
| ALDOA             | 2                         |
| ALDOC             | 1                         |
| ALG2              | 1                         |
| ALOX12B           | 1                         |
| ALS2CR4           | 1                         |
| ALS2CR8           | 1                         |
| ALX4              | 3                         |
| AMIGO2            | 2                         |
| AMOTL1            | 1                         |
| AMPD2             | 1                         |
| AMPD3             | 1                         |
| ANAPC1            | 1                         |
| ANGPTL2           | 1                         |
| ANKDD1A           | 1                         |
| ANKFY1            | 1                         |
| ANKHD1            | 1                         |
| ANKLE2            | 1                         |
| ANKRD11           | 1                         |
| ANKRD12           | 1                         |
| ANKRD13B          | 1                         |
| ANKRD17           | 1                         |
| ANKRD30B          | 1                         |
| ANKRD32           | 2                         |
| ANKRD33B          | 1                         |
| ANKRD39           | 1                         |
| ANKRD43           | 1                         |
| ANKRD53           | 1                         |
| ANKRD57           | 1                         |
| ANKS1A            | 1                         |
| ANO7              | 1                         |
| ANP32A            | 1                         |
| ANUBL1            | 1                         |
| ANXA7             | 1                         |

| UCSC_RefGene_Name | # of noteworthy CpG sites |
|-------------------|---------------------------|
| AP                | 1                         |
| AP1M2             | 1                         |
| AP2A2             | 1                         |
| AP2B1             | 1                         |
| AP2S1             | 1                         |
| AP3B1             | 1                         |
| AP4S1             | 1                         |
| APCDD1            | 1                         |
| APEX1             | 1                         |
| APH1B             | 1                         |
| APLN              | 1                         |
| APOL1             | 1                         |
| APOO              | 1                         |
| APTJ              | 1                         |
| AQR               | 1                         |
| ARF1              | 1                         |
| ARFGAP2           | 1                         |
| ARFGEF1           | 1                         |
| ARFGEF2           | 2                         |
| ARHGAP10          | 1                         |
| ARHGAP22          | 1                         |
| ARHGDIA           | 1                         |
| ARHGEF1           | 1                         |
| ARID3B            | 2                         |
| ARL2BP            | 1                         |
| ARL4A             | 2                         |
| ARL6              | 1                         |
| ARL6IP1           | 2                         |
| ARL8A             | 1                         |
| ARPC1B            | 1                         |
| ARPC4             | 1                         |
| ARPM1             | 1                         |
| ARRDC2            | 2                         |
| ARSG              | 1                         |
| ARSI              | 1                         |
| ART3              | 1                         |
| ASB6              | 1                         |
| ATAD5             | 1                         |
| ATF5              | 1                         |
| ATG10             | 1                         |
| ATG4D             | 2                         |
| ATG7              | 1                         |
| ATOX1             | 1                         |
| ATP1A3            | 2                         |
| ATP1B1            | 1                         |
| ATP5C1            | 1                         |
| ATP5E             | 1                         |
| ATP5J             | 2                         |
| ATP6V1B2          | 1                         |
| ATP6V1C2          | 2                         |
| ATP8B2            | 1                         |
| ATP8B3            | 1                         |

| UCSC_RefGene_Name | # of noteworthy CpG sites |
|-------------------|---------------------------|
| ATXN1             | 2                         |
| ATXN1L            | 1                         |
| ATXN2             | 1                         |
| ATXN7L1           | 1                         |
| B3GNT2            | 1                         |
| B4GALNT1          | 1                         |
| BACH2             | 1                         |
| BAD               | 1                         |
| BAG4              | 1                         |
| BAGE              | 1                         |
| BAGE2             | 1                         |
| BAGE3             | 1                         |
| BAGE4             | 1                         |
| BAGE5             | 2                         |
| BAHCC1            | 1                         |
| BANF1             | 1                         |
| BANP              | 1                         |
| BAT1              | 1                         |
| BAT1              | 1                         |
| BAT4              | 3                         |
| BBS4              | 1                         |
| BCL11B            | 1                         |
| BCL2L1            | 1                         |
| BCLAF             | 1                         |
| BCLAF1            | 1                         |
| BCS1L             | 1                         |
| BEST4             | 1                         |
| BET1              | 1                         |
| BIRC3             | 1                         |
| BIRC6             | 1                         |
| BLVRA             | 1                         |
| BMF               | 1                         |
| BMP8B             | 1                         |
| BNC1              | 1                         |
| BNIP2             | 1                         |
| BRE               | 1                         |
| BRF1              | 1                         |
| BRP44             | 1                         |
| BRP44L            | 2                         |
| BRUNOL5           | 1                         |
| BSDC1             | 1                         |
| BTBD10            | 1                         |
| BTBD6             | 1                         |
| BTC               | 1                         |
| BTG1              | 1                         |
| BUB1              | 2                         |
| BUD31             | 1                         |
| C10orf11          | 1                         |
| C10orf111         | 1                         |
| C10orf118         | 1                         |
| C10orf54          | 1                         |
| C10orf93          | 1                         |

| UCSC_RefGene_Name | # of noteworthy CpG sites |
|-------------------|---------------------------|
| C11orf2           | 1                         |
| C11orf54          | 1                         |
| C11orf63          | 1                         |
| C11orf88          | 1                         |
| C12               | 1                         |
| C12orf23          | 1                         |
| C12orf42          | 1                         |
| C12orf48          | 1                         |
| C12orf56          | 1                         |
| C12orf56          | 1                         |
| C12orf57          | 1                         |
| C12orf66          | 1                         |
| C14orf126         | 1                         |
| C14orf138         | 1                         |
| C14orf143         | 1                         |
| C14orf43          | 1                         |
| C15orf33          | 1                         |
| C15orf34          | 2                         |
| C15orf37          | 1                         |
| C15orf58          | 1                         |
| C16orf46          | 1                         |
| C16orf57          | 1                         |
| C16orf59          | 2                         |
| C16orf7           | 2                         |
| C16orf73          | 1                         |
| C16orf87          | 2                         |
| C16orf88          | 2                         |
| C17orf104         | 1                         |
| C17orf46          | 1                         |
| C17orf75          | 1                         |
| C17orf81          | 2                         |
| C17orf90          | 1                         |
| C18orf10          | 1                         |
| C18orf54          | 1                         |
| C19orf10          | 1                         |
| C19orf2           | 1                         |
| C19orf28          | 1                         |
| C19orf60          | 1                         |
| C1GALT1C1         | 1                         |
| C1o               | 1                         |
| C1orf113          | 1                         |
| C1orf131          | 1                         |
| C1orf163          | 1                         |
| C1orf182          | 1                         |
| C1orf183          | 1                         |
| C1orf198          | 1                         |
| C1orf203          | 1                         |
| C1orf220          | 1                         |
| C1orf227          | 1                         |
| C1orf228          | 2                         |
| C1orf58           | 1                         |
| C1orf84           | 1                         |

| UCSC_RefGene_Name | # of noteworthy CpG sites |
|-------------------|---------------------------|
| C1orf9            | 1                         |
| C1orf96           | 1                         |
| C1QL1             | 1                         |
| C2orf             | 1                         |
| C2orf112          | 1                         |
| C2orf43           | 2                         |
| C21orf58          | 1                         |
| C22orf24          | 1                         |
| C22orf32          | 1                         |
| C2or              | 1                         |
| C2orf15           | 2                         |
| C2orf27A          | 1                         |
| C2orf27B          | 1                         |
| C2orf34           | 1                         |
| C2orf51           | 1                         |
| C2orf67           | 1                         |
| C2orf76           | 1                         |
| C2orf88           | 1                         |
| C3orf37           | 1                         |
| C3orf47           | 1                         |
| C3orf52           | 1                         |
| C3orf70           | 1                         |
| C4orf10           | 1                         |
| C4orf14           | 1                         |
| C4orf19           | 1                         |
| C4orf34           | 1                         |
| C4orf36           | 1                         |
| C5orf             | 1                         |
| C5orf13           | 1                         |
| C5orf36           | 2                         |
| C5orf41           | 1                         |
| C5orf51           | 1                         |
| C6orf114          | 1                         |
| C6orf129          | 1                         |
| C6orf130          | 1                         |
| C6orf150          | 1                         |
| C6orf167          | 1                         |
| C6orf182          | 1                         |
| C6orf203          | 1                         |
| C6orf223          | 1                         |
| C6orf35           | 1                         |
| C6orf41           | 1                         |
| C7or              | 2                         |
| C7orf25           | 1                         |
| C7orf42           | 1                         |
| C7orf46           | 2                         |
| C7orf49           | 2                         |
| C7orf50           | 2                         |
| C7orf55           | 1                         |
| C7orf60           | 1                         |
| C7orf70           | 1                         |
| C8orf33           | 1                         |

| UCSC_RefGene_Name | # of noteworthy CpG sites |
|-------------------|---------------------------|
| C9orf122          | 1                         |
| C9orf128          | 1                         |
| C9orf139          | 1                         |
| C9orf25           | 1                         |
| C9orf69           | 1                         |
| C9orf93           | 1                         |
| CA14              | 1                         |
| CA7               | 1                         |
| CA9               | 1                         |
| CABIN1            | 1                         |
| CABLES2           | 1                         |
| CACNG8            | 2                         |
| CAD               | 1                         |
| CALU              | 1                         |
| CALY              | 1                         |
| CAMK1             | 1                         |
| CAMK1D            | 1                         |
| CAMK2B            | 1                         |
| CAMK2N1           | 1                         |
| CAMKK             | 1                         |
| CAMKK2            | 1                         |
| CAMTA1            | 2                         |
| CAND1             | 1                         |
| CAPZA1            | 2                         |
| CARS              | 1                         |
| CARS2             | 1                         |
| CASC1             | 2                         |
| CASP1             | 1                         |
| CASQ2             | 1                         |
| CAST              | 1                         |
| CATSPER2P         | 3                         |
| CBFA2T2           | 1                         |
| CBLL1             | 1                         |
| CBS               | 1                         |
| CBX3              | 1                         |
| CCBE1             | 1                         |
| CCDC107           | 1                         |
| CCDC121           | 1                         |
| CCDC134           | 1                         |
| CCDC137           | 1                         |
| CCDC151           | 1                         |
| CCDC163P          | 1                         |
| CCDC40            | 1                         |
| CCDC45            | 1                         |
| CCDC47            | 1                         |
| CCDC64            | 1                         |
| CCDC68            | 1                         |
| CCDC85C           | 4                         |
| CCDC86            | 1                         |

| UCSC_RefGene_Name | # of noteworthy CpG sites |
|-------------------|---------------------------|
| CCDC9             | 1                         |
| CCNB1             | 1                         |
| CCND2             | 1                         |
| CCRN4L            | 1                         |
| CCT3              | 1                         |
| CCT6A             | 1                         |
| CCT6B             | 1                         |
| CD247             | 1                         |
| CD300A            | 2                         |
| CD44              | 3                         |
| CD58              | 1                         |
| CD63              | 1                         |
| CD74              | 1                         |
| CD99L2            | 1                         |
| CDC42BPA          | 1                         |
| CDC5L             | 1                         |
| CDC73             | 1                         |
| CDGAP             | 1                         |
| CDH23             | 1                         |
| CDH3              | 2                         |
| CDH6              | 1                         |
| CDK19             | 1                         |
| CDK4              | 1                         |
| CDK6              | 1                         |
| CDKL1             | 1                         |
| CDKN1B            | 1                         |
| CDKN1C            | 1                         |
| CDKN2A            | 1                         |
| CDKN2BAS          | 1                         |
| CEACAM5           | 1                         |
| CEBPA             | 1                         |
| CEBPB             | 1                         |
| CELSR1            | 1                         |
| CENPJ             | 1                         |
| CEP350            | 1                         |
| CERK              | 1                         |
| CFC1              | 1                         |
| CFC1B             | 1                         |
| CFDP1             | 2                         |
| CFLAR             | 1                         |
| CGB2              | 1                         |
| CGB5              | 1                         |
| CGREF             | 1                         |
| CGREF1            | 1                         |
| CHCHD3            | 1                         |
| CHCHD4            | 1                         |
| CHD2              | 1                         |
| CHD7              | 1                         |
| CHEK2             | 1                         |
| CHID1             | 1                         |
| CHMP2B            | 1                         |
| CHPT1             | 1                         |



| UCSC_RefGene_Name | # of noteworthy CpG sites |
|-------------------|---------------------------|
| CHRD1             | 1                         |
| CHST13            | 1                         |
| CHST14            | 1                         |
| CHST6             | 2                         |
| CHSY1             | 1                         |
| CIB1              | 1                         |
| CILP2             | 2                         |
| CISD1             | 1                         |
| CISD3             | 1                         |
| CIZ1              | 1                         |
| CKAP5             | 2                         |
| CKAP5             | 2                         |
| CKB               | 1                         |
| CKS2              | 1                         |
| CLASP1            | 1                         |
| CLCA4             | 1                         |
| CLDN6             | 1                         |
| CLEC16A           | 1                         |
| CLEC4GP1          | 1                         |
| CLK2              | 2                         |
| CLSTN1            | 1                         |
| CLTCL1            | 3                         |
| CMPK2             | 1                         |
| CMTM4             | 1                         |
| CNKSR3            | 2                         |
| CNN2              | 1                         |
| CNOT10            | 1                         |
| CNOT4             | 1                         |
| CNOT6L            | 1                         |
| CNOT7             | 1                         |
| CNPY4             | 1                         |
| CNST              | 1                         |
| CNTN5             | 1                         |
| CNTNAP2           | 1                         |
| CNTNAP5           | 1                         |
| COBL              | 1                         |
| COCH              | 1                         |
| COIL              | 1                         |
| COL18A1           | 2                         |
| COL19A1           | 1                         |
| COL2A1            | 1                         |
| COL4A2            | 1                         |
| COL9A2            | 2                         |
| COPB1             | 1                         |
| COPS8             | 1                         |
| CORO6             | 1                         |
| COTL1             | 1                         |
| COX4I1            | 1                         |
| COX4NB            | 1                         |
| COX7A2L           | 3                         |
| CPEB1             | 1                         |
| CPEB2             | 1                         |

| UCSC_RefGene_Name | # of noteworthy CpG sites |
|-------------------|---------------------------|
| CPNE2             | 1                         |
| CPSF2             | 1                         |
| CPSF4             | 1                         |
| CRAMP1L           | 1                         |
| CRBN              | 1                         |
| CREB3L4           | 1                         |
| CREM              | 1                         |
| CRIP3             | 1                         |
| CRLS1             | 1                         |
| CRTAC1            | 1                         |
| CRYM              | 1                         |
| CSF1              | 1                         |
| CSNK2A1           | 1                         |
| CSNK2B            | 1                         |
| CSPG4             | 1                         |
| CST3              | 1                         |
| CTBP2             | 1                         |
| CTDSP2            | 1                         |
| CTNNA3            | 1                         |
| CTNNAL1           | 1                         |
| CTNND2            | 1                         |
| CTSA              | 1                         |
| CTSD              | 2                         |
| CTXN1             | 1                         |
| CUBN              | 1                         |
| CUL3              | 1                         |
| CUL4A             | 1                         |
| CUTA              | 1                         |
| CUX2              | 1                         |
| CXorf56           | 1                         |
| CXorf58           | 1                         |
| CXXC5             | 1                         |
| CYB561D2          | 2                         |
| CYB5R2            | 1                         |
| CYB5RL            | 1                         |
| CYP26B1           | 3                         |
| CYP2A             | 2                         |
| CYP2A7            | 2                         |
| CYP2S1            | 1                         |
| CYTH3             | 1                         |
| D2HGDH            | 1                         |
| DAGLB             | 1                         |
| DAP3              | 1                         |
| DBF4              | 1                         |
| DBI               | 1                         |
| DBP               | 1                         |
| DCAF5             | 1                         |
| DCAF6             | 1                         |
| DCBLD1            | 1                         |
| DCST1             | 1                         |
| DCTN2             | 1                         |
| DCTN5             | 2                         |

| UCSC_RefGene_Name | # of noteworthy CpG sites |
|-------------------|---------------------------|
| DCUN1D4           | 1                         |
| DDAH2             | 1                         |
| DDHD2             | 1                         |
| DDIT3             | 1                         |
| DDRGK1            | 2                         |
| DDX11             | 1                         |
| DDX17             | 1                         |
| DDX20             | 1                         |
| DDX23             | 1                         |
| DDX24             | 1                         |
| DDX41             | 1                         |
| DDX42             | 1                         |
| DDX59             | 1                         |
| DDX6              | 1                         |
| DEF               | 1                         |
| DEFB107A          | 1                         |
| DENND1B           | 1                         |
| DENND3            | 1                         |
| DES               | 1                         |
| DGAT2L6           | 1                         |
| DGCR6             | 1                         |
| DGKE              | 1                         |
| DGKI              | 2                         |
| DGKQ              | 1                         |
| DHDDS             | 2                         |
| DHH               | 1                         |
| DHRS13            | 1                         |
| DHX16             | 3                         |
| DHX30             | 1                         |
| DHX34             | 1                         |
| DHX38             | 1                         |
| DIAPH3            | 1                         |
| DICER1            | 1                         |
| DIDO1             | 1                         |
| DKFZP686I         | 1                         |
| DKFZp761E         | 1                         |
| DLC1              | 1                         |
| DLK1              | 1                         |
| DLL1              | 1                         |
| DLL4              | 1                         |
| DLX1              | 1                         |
| DLX4              | 1                         |
| DMRT3             | 1                         |
| DMRTA2            | 3                         |
| DNA2              | 1                         |
| DNAI1             | 1                         |
| DNAJB1            | 1                         |
| DNAJB12           | 1                         |
| DNAJB14           | 1                         |
| DNAJB9            | 1                         |
| DNAJC10           | 1                         |
| DNAJC27           | 1                         |

| UCSC_RefGene_Name | # of noteworthy CpG sites |
|-------------------|---------------------------|
| DNAJC3            | 2                         |
| DNAJC8            | 1                         |
| DNAL1             | 1                         |
| DNM1              | 2                         |
| DOC2B             | 1                         |
| DOCK5             | 1                         |
| DOK7              | 1                         |
| DP                | 1                         |
| DPH1              | 1                         |
| DPH2              | 1                         |
| DPP6              | 1                         |
| DPYSL4            | 1                         |
| DRAM1             | 1                         |
| DRG2              | 1                         |
| DSC2              | 1                         |
| DSCAML1           | 1                         |
| DST               | 1                         |
| DTWD1             | 1                         |
| DTWD2             | 1                         |
| DTYMK             | 1                         |
| DULLARD           | 2                         |
| DUPD1             | 1                         |
| DUSP1             | 1                         |
| DUSP5P            | 1                         |
| DYNC1H1           | 1                         |
| DYNC1LI1          | 1                         |
| DYNC1LI2          | 1                         |
| DYNLL2            | 1                         |
| DYNLT1            | 1                         |
| EARS2             | 1                         |
| EBF1              | 1                         |
| EBF4              | 1                         |
| ECD               | 1                         |
| ECE1              | 2                         |
| EDNRB             | 1                         |
| EFCAB4B           | 1                         |
| EFCAB6            | 1                         |
| EFNA3             | 1                         |
| EFNB2             | 1                         |
| EHD4              | 2                         |
| EHMT2             | 2                         |
| EIF1AD            | 1                         |
| EIF2C             | 1                         |
| EIF2C2            | 1                         |
| EIF3L             | 1                         |
| EIF4A1            | 1                         |
| EIF4B             | 1                         |
| EIF4E2            | 1                         |
| EIF4EBP2          | 1                         |
| EIF4G             | 1                         |
| EIF4G1            | 1                         |
| EIF5              | 1                         |

| UCSC_RefGene_Name | # of noteworthy CpG sites |
|-------------------|---------------------------|
| EIF5A2            | 1                         |
| ELK1              | 1                         |
| ELL               | 1                         |
| EMID2             | 1                         |
| EMILIN2           | 2                         |
| EMILIN3           | 1                         |
| EMX1              | 1                         |
| EMX20S            | 1                         |
| EN1               | 1                         |
| EN2               | 1                         |
| ENDOD1            | 1                         |
| ENOX2             | 1                         |
| ENPP1             | 1                         |
| ENPP6             | 1                         |
| ENPP7             | 1                         |
| ENSA              | 2                         |
| ENTPD6            | 1                         |
| EPAS1             | 3                         |
| EPB41L3           | 1                         |
| EPC1              | 1                         |
| EPHA4             | 1                         |
| EPHA5             | 1                         |
| EPHA8             | 1                         |
| EPHB4             | 1                         |
| EPS8L2            | 1                         |
| ERAP1             | 1                         |
| ESR2              | 1                         |
| ESRP2             | 1                         |
| ESRRA             | 2                         |
| ESRRG             | 2                         |
| ETAA1             | 1                         |
| ETV4              | 1                         |
| EVX1              | 1                         |
| EYA3              | 2                         |
| FABP5             | 3                         |
| FABP5L3           | 1                         |
| FADS1             | 1                         |
| FAF2              | 1                         |
| FAHD1             | 1                         |
| FAHD2B            | 1                         |
| FAM100A           | 1                         |
| FAM105B           | 1                         |
| FAM108A1          | 1                         |
| FAM111B           | 1                         |
| FAM113A           | 1                         |
| FAM118B           | 1                         |
| FAM119A           | 2                         |
| FAM12             | 1                         |
| FAM120A           | 1                         |
| FAM120AOS         | 1                         |
| FAM128B           | 1                         |
| FAM129C           | 1                         |

| UCSC_RefGene_Name | # of noteworthy CpG sites |
|-------------------|---------------------------|
| FAM134C           | 1                         |
| FAM149B1          | 1                         |
| FAM160B1          | 1                         |
| FAM162B           | 1                         |
| FAM175A           | 1                         |
| FAM189A1          | 1                         |
| FAM190A           | 2                         |
| FAM193B           | 1                         |
| FAM35A            | 1                         |
| FAM40B            | 1                         |
| FAM41C            | 2                         |
| FAM45A            | 1                         |
| FAM45B            | 1                         |
| FAM47C            | 1                         |
| FAM54B            | 2                         |
| FAM59A            | 3                         |
| FAM60A            | 1                         |
| FAM65B            | 1                         |
| FAM72B            | 1                         |
| FAM8              | 1                         |
| FAM82A1           | 1                         |
| FAM83B            | 1                         |
| FAM86B1           | 1                         |
| FAM86B2           | 1                         |
| FAM98C            | 1                         |
| FANCI             | 1                         |
| FANCM             | 1                         |
| FANK1             | 4                         |
| FARS2             | 1                         |
| FASN              | 1                         |
| FASTKD2           | 1                         |
| FASTKD5           | 1                         |
| FAT1              | 1                         |
| FAT4              | 2                         |
| FBRSL1            | 3                         |
| FBXL19            | 1                         |
| FBXO33            | 1                         |
| FBXW7             | 1                         |
| FEM1A             | 1                         |
| FGF3              | 1                         |
| FGFR2             | 1                         |
| FGFRL1            | 1                         |
| FHL2              | 1                         |
| FIBCD1            | 1                         |
| FIG4              | 1                         |
| FIP1L1            | 2                         |
| FIZ1              | 1                         |
| FJX1              | 1                         |
| FKBP9             | 1                         |
| FKBPL             | 2                         |
| FKRP              | 1                         |
| FLCN              | 1                         |

| UCSC_RefGene_Name | # of noteworthy CpG sites |
|-------------------|---------------------------|
| FLJ12825          | 1                         |
| FLJ13197          | 2                         |
| FLJ25006          | 1                         |
| FLJ35220          | 1                         |
| FLJ37453          | 1                         |
| FLJ40330          | 1                         |
| FLJ40504          | 1                         |
| FLJ40852          | 1                         |
| FLJ45244          | 1                         |
| FLJ45983          | 1                         |
| FLOT2             | 1                         |
| FLYWCH2           | 1                         |
| FMNL2             | 1                         |
| FN1               | 1                         |
| FNDC4             | 1                         |
| FNDC5             | 1                         |
| FOLR1             | 1                         |
| FOS               | 1                         |
| FOSL2             | 1                         |
| FOXC1             | 2                         |
| FOXD2             | 1                         |
| FOXG1             | 1                         |
| FOXP1             | 1                         |
| FOXP4             | 1                         |
| FRAS1             | 1                         |
| FREM2             | 1                         |
| FRG1              | 4                         |
| FRG1B             | 1                         |
| FRG2C             | 1                         |
| FRMD4A            | 3                         |
| FRMD6             | 1                         |
| FRZB              | 1                         |
| FTSJ2             | 1                         |
| FUBP3             | 2                         |
| FUT8              | 1                         |
| FXR1              | 1                         |
| FXR2              | 1                         |
| FXYD6             | 1                         |
| FYN               | 1                         |
| FZD10             | 1                         |
| FZD8              | 1                         |
| GAB2              | 1                         |
| GABARAPL2         | 1                         |
| GABPA             | 1                         |
| GABRB3            | 1                         |
| GABRE             | 1                         |
| GADD45A           | 1                         |
| GAK               | 2                         |
| GALNT13           | 1                         |
| GALNTL4           | 1                         |
| GALR1             | 1                         |
| GARS              | 1                         |

| UCSC_RefGene_Name | # of noteworthy CpG sites |
|-------------------|---------------------------|
| GATA2             | 1                         |
| GATA3             | 1                         |
| GATS              | 1                         |
| GBAS              | 1                         |
| GBP5              | 1                         |
| GBX1              | 1                         |
| GCAT              | 1                         |
| GCC1              | 1                         |
| GCDH              | 1                         |
| GCNT7             | 1                         |
| GCOM1             | 1                         |
| GDAP1L1           | 1                         |
| GDEP              | 2                         |
| GDF6              | 1                         |
| GF11              | 1                         |
| GFM2              | 1                         |
| GFOD1             | 1                         |
| GFOD2             | 1                         |
| GFRA1             | 1                         |
| GGCX              | 1                         |
| GGN               | 2                         |
| GGTLC1            | 1                         |
| GHR               | 1                         |
| GINS2             | 2                         |
| GIPR              | 1                         |
| GJB3              | 1                         |
| GJD4              | 1                         |
| GL                | 1                         |
| GLB1L3            | 1                         |
| GLE1              | 1                         |
| GLG1              | 1                         |
| GLIPR1            | 1                         |
| GLOD4             | 1                         |
| GLRA3             | 1                         |
| GLRX3             | 1                         |
| GLTSCR1           | 1                         |
| GLUD1             | 1                         |
| GMCL1             | 1                         |
| GMDS              | 1                         |
| GNA14             | 1                         |
| GNAS              | 1                         |
| GNB4              | 1                         |
| GNG7              | 1                         |
| GNL1              | 1                         |
| GNPAT             | 1                         |
| GOLGA3            | 1                         |
| GOLGA9P           | 1                         |
| GORAB             | 1                         |
| GORASP2           | 1                         |
| GPBP1L1           | 1                         |
| GPD1L             | 1                         |
| GPHN              | 1                         |



| UCSC_RefGene_Name | # of noteworthy CpG sites |
|-------------------|---------------------------|
| GPI               | 1                         |
| GPLD1             | 1                         |
| GPN1              | 1                         |
| GPR113            | 1                         |
| GPR124            | 1                         |
| GPR13             | 1                         |
| GPR137            | 1                         |
| GPR137C           | 2                         |
| GPR158            | 1                         |
| GPRIN1            | 1                         |
| GPS2              | 1                         |
| GPSM3             | 1                         |
| GPX4              | 1                         |
| GRB2              | 1                         |
| GRB7              | 1                         |
| GRID1             | 2                         |
| GRID2IP           | 2                         |
| GRIK2             | 1                         |
| GRINL1A           | 1                         |
| GRK5              | 1                         |
| GRM1              | 1                         |
| GRSF1             | 2                         |
| GSK3A             | 1                         |
| GSPT2             | 1                         |
| GSTK1             | 1                         |
| GSTP1             | 1                         |
| GTDC1             | 1                         |
| GTF               | 1                         |
| GTF2IRD1          | 1                         |
| GTF2IRD1          | 1                         |
| GTF3C6            | 1                         |
| GTPBP1            | 1                         |
| GTPBP2            | 1                         |
| GUSB              | 3                         |
| GUSBL2            | 1                         |
| GYG1              | 1                         |
| H1FX              | 1                         |
| HACE1             | 3                         |
| HADHA             | 1                         |
| HADHB             | 1                         |
| HAGH              | 1                         |
| HBP1              | 1                         |
| HCCA2             | 1                         |
| HCCA2             | 2                         |
| HCFC1             | 1                         |
| HCG11             | 1                         |
| HCG18             | 1                         |
| HCG27             | 1                         |
| HCG4              | 1                         |
| HCN2              | 1                         |
| HDAC1             | 1                         |
| HDAC2             | 2                         |

| UCSC_RefGene_Name | # of noteworthy CpG sites |
|-------------------|---------------------------|
| HDDC3             | 1                         |
| HELLS             | 1                         |
| HERC3             | 2                         |
| HERV-FRD          | 1                         |
| HES2              | 1                         |
| HES5              | 1                         |
| HES6              | 1                         |
| HEXA              | 2                         |
| HIAT1             | 1                         |
| HIC1              | 1                         |
| HIGD1A            | 1                         |
| HIGD2B            | 1                         |
| HIP1              | 2                         |
| HIST1H2AK         | 1                         |
| HIST1H2AL         | 1                         |
| HIST1H2BN         | 1                         |
| HIST1H4J          | 1                         |
| HIVEP2            | 2                         |
| HLA-A             | 1                         |
| HLA-DMA           | 1                         |
| HLA-E             | 1                         |
| HLA-J             | 1                         |
| HLCS              | 1                         |
| HM13              | 1                         |
| HMBS              | 1                         |
| HMCN1             | 1                         |
| HMG20B            | 1                         |
| HMGB2             | 1                         |
| HMGN1             | 2                         |
| HMGXB3            | 1                         |
| HMOX2             | 1                         |
| HMX3              | 1                         |
| HNF1B             | 1                         |
| HNMT              | 1                         |
| HNRNPA1           | 1                         |
| HNRNPA2B1         | 2                         |
| HNRNPF            | 1                         |
| HNRNPH3           | 1                         |
| HNRNPK            | 1                         |
| HNRPA1L-2         | 1                         |
| HOXA10            | 1                         |
| HOXB13            | 1                         |
| HOXB9             | 1                         |
| HOXD12            | 1                         |
| HOXD3             | 1                         |
| HOXD8             | 1                         |
| HP1BP3            | 1                         |
| HRK               | 1                         |
| HRNBP3            | 1                         |
| HS2ST1            | 1                         |
| HS3ST1            | 1                         |
| HS3ST3B1          | 1                         |

| UCSC_RefGene_Name | # of noteworthy CpG sites |
|-------------------|---------------------------|
| HS3ST4            | 1                         |
| HSD17B11          | 1                         |
| HSDL2             | 1                         |
| HSF2              | 1                         |
| HSP90B1           | 1                         |
| HSPA1A            | 1                         |
| HSPA1L            | 1                         |
| HSPA4             | 1                         |
| HSPA4L            | 1                         |
| HSPC157           | 1                         |
| HTR1A             | 1                         |
| HYAL2             | 1                         |
| IARS              | 1                         |
| ICA1              | 3                         |
| ID2               | 2                         |
| IDH1              | 1                         |
| IDH3G             | 1                         |
| IER3              | 2                         |
| IFFO2             | 1                         |
| IFI27L1           | 1                         |
| IFITM4P           | 1                         |
| IFNAR1            | 1                         |
| IFNAR2            | 1                         |
| IFNGR1            | 1                         |
| IFRD1             | 1                         |
| IFT12             | 1                         |
| IFT122            | 1                         |
| IGF2BP2           | 1                         |
| IGFBP1            | 1                         |
| IGFBP5            | 1                         |
| IGFBP6            | 1                         |
| IGSF3             | 1                         |
| IHH               | 1                         |
| IKZF1             | 1                         |
| IL12B             | 1                         |
| IL1RA             | 1                         |
| IL1RAP            | 1                         |
| IL31RA            | 1                         |
| IL4I1             | 1                         |
| IL6ST             | 1                         |
| IMPAD1            | 1                         |
| IMPDH1            | 1                         |
| INCA1             | 1                         |
| INPP4A            | 1                         |
| INPP5A            | 2                         |
| INSM2             | 1                         |
| INTS3             | 1                         |
| IPMK              | 1                         |
| IPO13             | 1                         |
| IQCD              | 1                         |
| IQCE              | 2                         |
| IQCG              | 1                         |

| UCSC_RefGene_Name | # of noteworthy CpG sites |
|-------------------|---------------------------|
| IQCK              | 2                         |
| IQSEC1            | 1                         |
| IQSEC3            | 1                         |
| IRAK1BP1          | 1                         |
| IRF1              | 1                         |
| IRF2              | 2                         |
| IRF2BP1           | 1                         |
| IRX4              | 1                         |
| IRX5              | 1                         |
| ISG20             | 1                         |
| ITFG3             | 1                         |
| ITM2C             | 1                         |
| ITPR3             | 2                         |
| JAG1              | 1                         |
| JMJD4             | 1                         |
| JMJD5             | 1                         |
| JMY               | 1                         |
| JSRP1             | 1                         |
| JUN               | 1                         |
| JUNB              | 1                         |
| KARS              | 1                         |
| KATNAL2           | 1                         |
| KBTBD3            | 1                         |
| KCNC2             | 1                         |
| KCNH2             | 1                         |
| KCNIP3            | 1                         |
| KCNK5             | 1                         |
| KCNK9             | 2                         |
| KCNMA1            | 1                         |
| KCNN1             | 1                         |
| KCNQ2             | 1                         |
| KCNQ4             | 1                         |
| KCTD13            | 1                         |
| KCTD5             | 1                         |
| KDM1B             | 1                         |
| KDM6B             | 1                         |
| KEAP1             | 1                         |
| KHDC1             | 1                         |
| KHDRBS1           | 1                         |
| KHDRBS2           | 1                         |
| KIA               | 1                         |
| KIAA0             | 1                         |
| KIAA0040          | 1                         |
| KIAA0100          | 1                         |
| KIAA0141          | 1                         |
| KIAA0182          | 1                         |
| KIAA0319          | 1                         |
| KIAA0427          | 1                         |
| KIAA0556          | 1                         |
| KIAA0564          | 1                         |
| KIAA0664          | 1                         |
| KIAA0895L         | 1                         |

| UCSC_RefGene_Name | # of noteworthy CpG sites |
|-------------------|---------------------------|
| KIAA1143          | 1                         |
| KIAA1147          | 1                         |
| KIAA1244          | 1                         |
| KIAA1328          | 1                         |
| KIAA1370          | 1                         |
| KIAA1430          | 1                         |
| KIAA1539          | 1                         |
| KIAA1671          | 1                         |
| KIAA1908          | 1                         |
| KIAA2013          | 1                         |
| KIF15             | 1                         |
| KIF18A            | 1                         |
| KIF1C             | 1                         |
| KIF20B            | 1                         |
| KIF4A             | 1                         |
| KILLIN            | 1                         |
| KIN               | 1                         |
| KISS1             | 1                         |
| KL                | 1                         |
| KLC4              | 1                         |
| KLF11             | 1                         |
| KLF14             | 2                         |
| KLF2              | 2                         |
| KLF3              | 2                         |
| KLF5              | 1                         |
| KLHDC1            | 1                         |
| KLHDC2            | 1                         |
| KLHL10            | 1                         |
| KLHL11            | 2                         |
| KLHL17            | 2                         |
| KLHL2             | 1                         |
| KLHL24            | 1                         |
| CLK6              | 1                         |
| KNTC1             | 2                         |
| KRCC1             | 2                         |
| KRT7              | 2                         |
| LAMB2             | 1                         |
| LARP1             | 1                         |
| LARP4             | 1                         |
| LASP1             | 1                         |
| LASS2             | 1                         |
| LASS4             | 1                         |
| LBX2              | 1                         |
| LDHB              | 1                         |
| LENG8             | 1                         |
| LEO1              | 1                         |
| LGMN              | 1                         |
| LGR6              | 1                         |
| LHX6              | 1                         |
| LHX8              | 2                         |
| LHX9              | 1                         |
| LIG3              | 1                         |

| UCSC_RefGene_Name | # of noteworthy CpG sites |
|-------------------|---------------------------|
| LIG4              | 1                         |
| LIMA1             | 1                         |
| LIN9              | 1                         |
| LIPE              | 1                         |
| LIPT2             | 1                         |
| LLGL1             | 1                         |
| LMAN1             | 1                         |
| LMBRD1            | 1                         |
| LMBRD2            | 1                         |
| LMF1              | 2                         |
| LMF2              | 1                         |
| LMO7              | 1                         |
| LMX1B             | 1                         |
| LNX2              | 1                         |
| LO                | 2                         |
| LOC               | 1                         |
| LOC100128         | 2                         |
| LOC100129         | 1                         |
| LOC100131691      | 1                         |
| LOC100133         | 1                         |
| LOC100133315      | 1                         |
| LOC100192         | 1                         |
| LOC100240726      | 1                         |
| LOC100270         | 1                         |
| LOC100271         | 1                         |
| LOC100272         | 2                         |
| LOC100294         | 1                         |
| LOC100294362      | 1                         |
| LOC10030          | 1                         |
| LOC150786         | 1                         |
| LOC151534         | 1                         |
| LOC152217         | 1                         |
| LOC22093          | 1                         |
| LOC220930         | 1                         |
| LOC221710         | 1                         |
| LOC253724         | 1                         |
| LOC283663         | 1                         |
| LOC285359         | 1                         |
| LOC285548         | 1                         |
| LOC285830         | 1                         |
| LOC285830         | 2                         |
| LOC348926         | 1                         |
| LOC387647         | 2                         |
| LOC400927         | 1                         |
| LOC401052         | 1                         |
| LOC440910         | 1                         |
| LOC442421         | 1                         |
| LOC642826         | 1                         |
| LOC642852         | 1                         |
| LOC643837         | 1                         |
| LOC645323         | 2                         |
| LOC64543          | 1                         |

| UCSC_RefGene_Name | # of noteworthy CpG sites |
|-------------------|---------------------------|
| LOC64647          | 2                         |
| LOC647979         | 1                         |
| LOC654342         | 3                         |
| LOC728411         | 1                         |
| LOC728643         | 1                         |
| LOC80054          | 1                         |
| LOC92659          | 1                         |
| LONP1             | 1                         |
| LONP2             | 1                         |
| LOXL1             | 1                         |
| LPP               | 1                         |
| LPPR2             | 1                         |
| LRBA              | 2                         |
| LRPAP1            | 1                         |
| LRRC16A           | 1                         |
| LRRC2;LRRC2       | 1                         |
| LRRC20            | 1                         |
| LRRC3             | 1                         |
| LRRC4B            | 1                         |
| LRRC4C            | 1                         |
| LRRC56            | 1                         |
| LRRC59            | 1                         |
| LRRC8B            | 1                         |
| LRRC8D            | 1                         |
| LRRFIP1           | 1                         |
| LSM1              | 1                         |
| LSM2              | 1                         |
| LSM3              | 1                         |
| LTBP3             | 1                         |
| LTF               | 1                         |
| LY6G6E            | 1                         |
| LYL1              | 2                         |
| LYN               | 1                         |
| LYRM4             | 2                         |
| LYRM5             | 2                         |
| LYRM7             | 1                         |
| LYSMD2            | 2                         |
| MACROD1           | 1                         |
| MAD1L             | 2                         |
| MAD1L1            | 2                         |
| MAD2L1BP          | 1                         |
| MADD              | 2                         |
| MAEA              | 1                         |
| MAF1              | 1                         |
| MAFB              | 1                         |
| MAFG              | 1                         |
| MAGI1             | 1                         |
| MAGOHB            | 1                         |
| MANEA             | 1                         |
| MANF              | 1                         |
| MANSC1            | 1                         |
| MAP2K1            | 1                         |

| UCSC_RefGene_Name | # of noteworthy CpG sites |
|-------------------|---------------------------|
| MAP3K13           | 1                         |
| MAP7D2            | 1                         |
| MAPK14            | 1                         |
| MARCH6            | 1                         |
| MARCKS            | 1                         |
| MARS2             | 1                         |
| MAST1             | 1                         |
| MAST2             | 1                         |
| MAST4             | 1                         |
| MBD4              | 1                         |
| MBLAC2            | 2                         |
| MBTPS1            | 1                         |
| MCAM              | 2                         |
| MCF2L2            | 1                         |
| MCM10             | 1                         |
| MCM4              | 1                         |
| MCOLN2            | 1                         |
| MCOLN3            | 1                         |
| MCOLN3            | 1                         |
| MDFIC             | 1                         |
| MDGA2             | 1                         |
| MDH1B             | 1                         |
| MDH2              | 1                         |
| MDP1              | 1                         |
| ME3               | 3                         |
| MED13L            | 1                         |
| MED8              | 1                         |
| MEF2A             | 1                         |
| MEF2C             | 1                         |
| MEGF10            | 1                         |
| MEGF11            | 1                         |
| MEIG1             | 1                         |
| MESDC1            | 1                         |
| MESP2             | 1                         |
| METAP1            | 1                         |
| METRNL            | 2                         |
| METRNL            | 2                         |
| METT5D1           | 1                         |
| METTL13           | 1                         |
| MFGE8             | 1                         |
| MFSD10            | 1                         |
| MFSD4             | 1                         |
| MGAT1             | 1                         |
| MGC16275          | 1                         |
| MGC2752           | 1                         |
| MGST2             | 1                         |
| MIB1              | 1                         |
| MIDN              | 1                         |
| MIF               | 2                         |
| MINK1             | 1                         |
| MIR1              | 1                         |
| MIR1204           | 1                         |



| UCSC_RefGene_Name | # of noteworthy CpG sites |
|-------------------|---------------------------|
| MIR1231           | 2                         |
| MIR1253           | 1                         |
| MIR148A           | 1                         |
| MIR1538           | 1                         |
| MIR181C           | 1                         |
| MIR181D           | 1                         |
| MIR1908           | 1                         |
| MIR220            | 1                         |
| MIR220B           | 1                         |
| MIR2276           | 1                         |
| MIR372            | 1                         |
| MIR548H3          | 1                         |
| MIR548N           | 1                         |
| MIR573            | 1                         |
| MIR663            | 2                         |
| MIR663B           | 1                         |
| MIR760            | 1                         |
| MIXL1             | 1                         |
| MKRN1             | 1                         |
| MLL3              | 1                         |
| MLX               | 1                         |
| MMACHC            | 1                         |
| MNAT1             | 1                         |
| MNT               | 1                         |
| MOBK              | 1                         |
| MOBKL2C           | 1                         |
| MOCOS             | 1                         |
| MORC3             | 1                         |
| MORF4L1           | 1                         |
| MORG1             | 2                         |
| MPPE1             | 1                         |
| MPPED1            | 1                         |
| MPPED2            | 1                         |
| MPZL1             | 1                         |
| MR1               | 1                         |
| MRP63             | 1                         |
| MRPL14            | 1                         |
| MRPL2             | 1                         |
| MRPL23            | 1                         |
| MRPL34            | 1                         |
| MRPL37            | 1                         |
| MRPS17            | 1                         |
| MRPS28            | 1                         |
| MRPS30            | 1                         |
| MRPS9             | 1                         |
| MSH6              | 1                         |
| MSI1              | 1                         |
| MSN               | 1                         |
| MSX1              | 1                         |
| MSX2              | 1                         |
| MT1H              | 1                         |
| MT3               | 1                         |

| UCSC_RefGene_Name | # of noteworthy CpG sites |
|-------------------|---------------------------|
| MTCH2             | 1                         |
| MTHFD2L           | 2                         |
| MTIF3             | 1                         |
| MTMR15            | 1                         |
| MTMR3             | 2                         |
| MTTP              | 1                         |
| MTX1              | 1                         |
| MUC1              | 1                         |
| MUTYH             | 1                         |
| MXI1              | 1                         |
| MYBL1             | 1                         |
| MYBL2             | 1                         |
| MYCBPAP           | 1                         |
| MYH13             | 1                         |
| MYO3A             | 1                         |
| MYOCD;MYOCD;      | 1                         |
| NAA16             | 1                         |
| NAA20             | 1                         |
| NAA30             | 1                         |
| NAGS              | 1                         |
| NAP1L4            | 1                         |
| NARF              | 1                         |
| NAT15             | 1                         |
| NAT8L             | 1                         |
| NAV1              | 1                         |
| NBN               | 1                         |
| NCAM1             | 1                         |
| NCAPD3            | 1                         |
| NCAPH2            | 2                         |
| NCBP2             | 2                         |
| NCK1              | 2                         |
| NCL               | 1                         |
| NCRNA0            | 2                         |
| NCRNA00087        | 1                         |
| NCRNA0009         | 1                         |
| NCRNA0011         | 1                         |
| NCRNA00164        | 1                         |
| NCRNA0017         | 2                         |
| NCRNA00171        | 1                         |
| NDFIP1            | 1                         |
| NDFIP2            | 1                         |
| NDRG3             | 1                         |
| NDUFA3            | 1                         |
| NDUFA4            | 1                         |
| NDUFA4L2          | 1                         |
| NDUFA5            | 2                         |
| NDUFAF4           | 3                         |
| NDUFB1            | 1                         |
| NDUFC1            | 1                         |
| NEFM              | 1                         |
| NEGR1             | 1                         |
| NEK10             | 1                         |

| UCSC_RefGene_Name | # of noteworthy CpG sites |
|-------------------|---------------------------|
| NELL1             | 1                         |
| NEO1              | 1                         |
| NEURL1B           | 1                         |
| NEURL2            | 1                         |
| NEUROD1           | 1                         |
| NEUROG1           | 1                         |
| NFAT5             | 1                         |
| NFATC2IP          | 1                         |
| NFE2L2            | 1                         |
| NFKBIL2           | 1                         |
| NFXL1             | 1                         |
| NFYA              | 1                         |
| NHLH2             | 1                         |
| NHSL1             | 1                         |
| NIPA1             | 1                         |
| NIPA1             | 1                         |
| NIPSNAP3B         | 1                         |
| NIT1              | 1                         |
| NKAIN3            | 1                         |
| NKX2-2            | 1                         |
| NKX2-8            | 2                         |
| NLGN1             | 1                         |
| NLGN4X            | 1                         |
| NLN               | 1                         |
| NLRP6             | 1                         |
| NMB               | 1                         |
| NME2P1            | 1                         |
| NMI               | 1                         |
| NMNAT1            | 1                         |
| NOB1              | 1                         |
| NOC2L             | 1                         |
| NOD1              | 1                         |
| NOL               | 1                         |
| NOL11             | 1                         |
| NOL12             | 1                         |
| NOL6              | 1                         |
| NOM1              | 1                         |
| NOP10             | 1                         |
| NOP56             | 1                         |
| NOSIP             | 1                         |
| NOTCH2NL          | 1                         |
| NOTCH4            | 2                         |
| NPDC1             | 1                         |
| NPHP3             | 1                         |
| NPHS2             | 1                         |
| NPLOC4            | 1                         |
| NPR1              | 1                         |
| NR1H2             | 1                         |
| NR3C1             | 1                         |
| NR4A3             | 1                         |
| NR5A2             | 1                         |
| NRD1              | 1                         |

| UCSC_RefGene_Name | # of noteworthy CpG sites |
|-------------------|---------------------------|
| NSA2              | 2                         |
| NT5C3             | 1                         |
| NT5C3L            | 1                         |
| NTF4              | 1                         |
| NTM               | 1                         |
| NTN1              | 1                         |
| NUDT1             | 1                         |
| NUDT11            | 1                         |
| NUDT15            | 1                         |
| NUMBL             | 1                         |
| NUP62             | 1                         |
| NUS1              | 1                         |
| NXN               | 2                         |
| OC90              | 1                         |
| OCRL              | 1                         |
| ODF2              | 1                         |
| ODF3B             | 1                         |
| ODZ2              | 1                         |
| OFD1              | 1                         |
| OGDHL             | 1                         |
| OLIG2             | 1                         |
| OLIG3             | 1                         |
| ONECUT1           | 1                         |
| OR1J1             | 1                         |
| OR2H1             | 1                         |
| OR5M10            | 2                         |
| OR5M8             | 1                         |
| OR8U8             | 2                         |
| ORC3L             | 1                         |
| ORMDL1            | 2                         |
| OSBPL8            | 2                         |
| OSGEP             | 1                         |
| OSR1              | 1                         |
| OSTBETA           | 1                         |
| OSTC              | 1                         |
| OTOP1             | 1                         |
| OTUD1             | 1                         |
| OTUD3             | 1                         |
| P2RX4             | 1                         |
| P4HA1             | 1                         |
| P4HA3             | 1                         |
| PACRG             | 1                         |
| PACS2             | 1                         |
| PAFAH1B2          | 1                         |
| PAIP2             | 1                         |
| PAIP2B            | 1                         |
| PALB2             | 2                         |
| PAOX              | 1                         |
| PAPD4             | 1                         |
| PAPLN             | 1                         |
| PAPSS2            | 1                         |
| PAR4              | 1                         |

| UCSC_RefGene_Name | # of noteworthy CpG sites |
|-------------------|---------------------------|
| PARD6B            | 1                         |
| PARK2             | 1                         |
| PARL              | 1                         |
| PARP3             | 1                         |
| PARVA             | 1                         |
| PARVG             | 1                         |
| PAX4              | 1                         |
| PAX6              | 3                         |
| PAX7              | 1                         |
| PBLD              | 1                         |
| PBX2              | 2                         |
| PBX3              | 1                         |
| PBX4              | 1                         |
| PCBP2             | 1                         |
| PCDH11X           | 1                         |
| PCDHA             | 2                         |
| PCDHA1            | 2                         |
| PCDHA10           | 2                         |
| PCDHA11           | 1                         |
| PCDHA12           | 2                         |
| PCDHA2            | 2                         |
| PCDHA3            | 1                         |
| PCDHA4            | 2                         |
| PCDHA6            | 2                         |
| PCDHA7            | 2                         |
| PCDHAC2           | 1                         |
| PCDHB4            | 1                         |
| PCDHG             | 1                         |
| PCDHGA1           | 1                         |
| PCDHGA4           | 1                         |
| PCDHGA5           | 1                         |
| PCDHGA6           | 1                         |
| PCDHGA8           | 1                         |
| PCDHGA9           | 1                         |
| PCGF3             | 1                         |
| PCID2             | 1                         |
| PCMTD1            | 1                         |
| PCNT              | 2                         |
| PCSK1             | 1                         |
| PDCD5             | 1                         |
| PDE10A            | 1                         |
| PDE3B             | 1                         |
| PDE4C             | 1                         |
| PDE7A             | 1                         |
| PDE8B             | 1                         |
| PDGFRB            | 1                         |
| PDIA3             | 2                         |
| PDK1              | 2                         |
| PDP1              | 2                         |
| PDP2              | 1                         |
| PDPK1             | 1                         |
| PDX1              | 1                         |

| UCSC_RefGene_Name | # of noteworthy CpG sites |
|-------------------|---------------------------|
| PDZD11            | 1                         |
| PDZD8             | 1                         |
| PDZRN3            | 1                         |
| PEA15             | 1                         |
| PEBP1             | 1                         |
| PEBP4             | 1                         |
| PEF1              | 2                         |
| PEG10             | 1                         |
| PELI1             | 1                         |
| PENK              | 1                         |
| PER2              | 1                         |
| PET112L           | 1                         |
| PEX10             | 1                         |
| PEX3              | 1                         |
| PFDN2             | 1                         |
| PFDN4             | 1                         |
| PFKFB2            | 1                         |
| PFKL              | 2                         |
| PGAM1             | 1                         |
| PGD               | 1                         |
| PGGT1B            | 1                         |
| PGLY              | 1                         |
| PGLYRP2           | 1                         |
| PGM2              | 1                         |
| PGRMC2            | 1                         |
| PHF1              | 1                         |
| PHF10             | 1                         |
| PHF15             | 1                         |
| PHF23             | 1                         |
| PHF5A             | 1                         |
| PHIP              | 1                         |
| PHKB              | 1                         |
| PHLPP1            | 1                         |
| PHOSPHO1          | 1                         |
| PHTF1             | 1                         |
| PHTF2             | 1                         |
| PI4K2A            | 1                         |
| PI4K2B            | 2                         |
| PI4KA             | 2                         |
| PIGQ              | 1                         |
| PIK3AP1           | 1                         |
| PIK3R2            | 1                         |
| PIK3R3            | 1                         |
| PINK1             | 1                         |
| PIPSL             | 1                         |
| PITRM1            | 1                         |
| PKD1              | 1                         |
| PKNOX1            | 1                         |
| PKNOX2            | 1                         |
| PKP2              | 1                         |
| PLAC9             | 1                         |
| PLCB3             | 1                         |

| UCSC_RefGene_Name | # of noteworthy CpG sites |
|-------------------|---------------------------|
| PLCG2             | 1                         |
| PLEKHA3           | 1                         |
| PLEKHA7           | 1                         |
| PLEKHA8           | 1                         |
| PLEKHG3           | 1                         |
| PLEKHH1           | 1                         |
| PLEKHJ1           | 1                         |
| PLEKHN1           | 1                         |
| PLIN5             | 1                         |
| PLOD3             | 2                         |
| PLXDC2            | 1                         |
| PLXNA4            | 1                         |
| PM20D2            | 1                         |
| PMM2              | 1                         |
| PMS1              | 2                         |
| PMS2L3            | 1                         |
| PNMA1             | 1                         |
| PNO1              | 1                         |
| PNPO              | 1                         |
| PNRC1             | 1                         |
| PODXL             | 1                         |
| PODXL2            | 1                         |
| POFUT2            | 1                         |
| POL3S             | 1                         |
| POLB              | 1                         |
| POLDIP2           | 1                         |
| POLL              | 1                         |
| POLR1C            | 1                         |
| POLR1D            | 1                         |
| POLR2J2           | 1                         |
| POLR2J4           | 1                         |
| POLR2L            | 1                         |
| POLR3G            | 2                         |
| POU4F1            | 1                         |
| PPARA             | 1                         |
| PPARGC1B          | 1                         |
| PPFIA1            | 1                         |
| PPIA              | 1                         |
| PPIC              | 1                         |
| PPIE              | 2                         |
| PPM1B             | 1                         |
| PPM1E             | 1                         |
| PPM1F             | 1                         |
| PPM1L             | 1                         |
| PPP1CA            | 1                         |
| PPP1R             | 1                         |
| PPP1R11           | 1                         |
| PPP1R12A          | 1                         |
| PPP1R12B          | 2                         |
| PPP1R1A           | 1                         |
| PPP2CA            | 1                         |
| PPP2CB            | 1                         |

| UCSC_RefGene_Name | # of noteworthy CpG sites |
|-------------------|---------------------------|
| PPP2R2D           | 2                         |
| PPP2R3A           | 1                         |
| PPP2R5C           | 1                         |
| PPP4C             | 1                         |
| PPP4R2            | 2                         |
| PQLC2             | 1                         |
| PRDM1             | 1                         |
| PRDM15            | 1                         |
| PRDX2             | 1                         |
| PRDXDD1P          | 1                         |
| PRELP             | 1                         |
| PREPL             | 1                         |
| PRH1              | 1                         |
| PRKACA            | 1                         |
| PRKCG             | 1                         |
| PRKCH             | 1                         |
| PRKCZ             | 1                         |
| PRKG1             | 1                         |
| PRKRIR            | 2                         |
| PRPF39            | 1                         |
| PRPF40B           | 2                         |
| PRR18             | 1                         |
| PRR3              | 1                         |
| PRR4              | 1                         |
| PRR5L             | 1                         |
| PRRC1             | 1                         |
| PRRG2             | 1                         |
| PRRt              | 1                         |
| PRTG              | 1                         |
| PSMA1             | 1                         |
| PSMB3             | 1                         |
| PSMC3             | 1                         |
| PSMD11            | 1                         |
| PSMD3             | 1                         |
| PSMD8             | 1                         |
| PSMD9             | 1                         |
| PSME2             | 2                         |
| PSME4             | 1                         |
| PSMG1             | 1                         |
| PSMG3             | 1                         |
| PSPH              | 1                         |
| PTBP1             | 1                         |
| PTCD1             | 1                         |
| PTDSS2            | 1                         |
| PTEN              | 1                         |
| PTENP1            | 1                         |
| PTGER2            | 1                         |
| PTGES3            | 1                         |
| PTK6              | 1                         |
| PTPLAD1           | 1                         |
| PTPN1             | 1                         |
| PTPN1             | 1                         |



| UCSC_RefGene_Name | # of noteworthy CpG sites |
|-------------------|---------------------------|
| PTPN11            | 1                         |
| PTPN12            | 1                         |
| PTPN4             | 1                         |
| PTPRD             | 1                         |
| PTPRJ             | 2                         |
| PTPRN             | 5                         |
| PTPRN2            | 8                         |
| PTRF              | 1                         |
| PURG              | 1                         |
| PV                | 1                         |
| PVT1              | 1                         |
| QRSL1             | 2                         |
| RA                | 1                         |
| RAB11A            | 2                         |
| RAB11B            | 1                         |
| RAB11FIP3         | 1                         |
| RAB15             | 1                         |
| RAB1B             | 1                         |
| RAB27B            | 1                         |
| RAB2A             | 1                         |
| RAB32             | 1                         |
| RAB33B            | 1                         |
| RAB37             | 1                         |
| RAB7A             | 1                         |
| RAB9A             | 1                         |
| RABL5             | 1                         |
| RAC2              | 1                         |
| RAD54L            | 1                         |
| RALBP1            | 2                         |
| RALGAPA1          | 1                         |
| RALGPS1           | 1                         |
| RANBP1            | 1                         |
| RANBP3            | 1                         |
| RANBP9            | 1                         |
| RANGAP1           | 1                         |
| RARS2             | 1                         |
| RASAL1            | 1                         |
| RASG              | 1                         |
| RASGRP            | 1                         |
| RASGRP3           | 1                         |
| RASGRP4           | 1                         |
| RASL11B           | 1                         |
| RASSF3            | 1                         |
| RBBP4             | 2                         |
| RBKS              | 1                         |
| RBL1              | 1                         |
| RBM4B             | 1                         |
| RBP1              | 1                         |
| RCN1              | 1                         |
| RCOR2             | 1                         |
| RDH14             | 1                         |
| REEP2             | 1                         |

| UCSC_RefGene_Name | # of noteworthy CpG sites |
|-------------------|---------------------------|
| REEP4             | 1                         |
| REEP6             | 2                         |
| RELN              | 1                         |
| REM2              | 1                         |
| REV3L             | 1                         |
| REXO1             | 1                         |
| RFESD             | 1                         |
| RFWD2             | 1                         |
| RFX7              | 1                         |
| RFX8              | 1                         |
| RFXAP             | 1                         |
| RG9MTD2           | 1                         |
| RGL2              | 1                         |
| RGNEF             | 1                         |
| RGS12             | 1                         |
| RGS7BP            | 1                         |
| RHBDF2            | 1                         |
| RHOA              | 1                         |
| RHOB              | 1                         |
| RHOBTB1           | 1                         |
| RIC8A             | 1                         |
| RICTOR            | 1                         |
| RIMKLA            | 1                         |
| RIOK3             | 2                         |
| RIT1              | 1                         |
| RMI1              | 1                         |
| RNASEH2B          | 1                         |
| RNF11             | 2                         |
| RNF114            | 1                         |
| RNF122            | 1                         |
| RNF150            | 2                         |
| RNF160            | 1                         |
| RNF2              | 1                         |
| RNF220            | 1                         |
| RNF31             | 2                         |
| RNF41             | 1                         |
| RNF7              | 1                         |
| RNGTT             | 1                         |
| RNMTL1            | 1                         |
| RNU5D             | 1                         |
| RNU5E             | 1                         |
| ROB01             | 1                         |
| RORA              | 1                         |
| RP11-529I         | 1                         |
| RP5-1022P6.2      | 1                         |
| RPL13A            | 1                         |
| RPL13AP5          | 1                         |
| RPL17             | 1                         |
| RPL18             | 1                         |
| RPL23AP82         | 1                         |
| RPL26             | 1                         |
| RPL27             | 1                         |

| UCSC_RefGene_Name | # of noteworthy CpG sites |
|-------------------|---------------------------|
| RPL29             | 1                         |
| RPL35A            | 2                         |
| RPL37             | 2                         |
| RPL6              | 1                         |
| RPL8              | 1                         |
| RPP38             | 2                         |
| RPS12             | 1                         |
| RPS12             | 1                         |
| RPS14             | 1                         |
| RPS19             | 1                         |
| RPS25             | 1                         |
| RPS27L            | 1                         |
| RPS2P32           | 1                         |
| RPS3A             | 1                         |
| RPS6              | 1                         |
| RPS6KA2           | 3                         |
| RPS6KA4           | 1                         |
| RPS8              | 1                         |
| RPTOR             | 1                         |
| RPUSD4            | 1                         |
| RRAGD             | 1                         |
| RRP9              | 1                         |
| RSL1D1            | 1                         |
| RSP02             | 1                         |
| RSP04             | 1                         |
| RSRC2             | 2                         |
| RTBDN             | 1                         |
| RTEL1             | 1                         |
| RTF1              | 1                         |
| RTN3              | 1                         |
| RTN4              | 1                         |
| RTN4IP1           | 2                         |
| RTN4RL1           | 1                         |
| RUNX1             | 1                         |
| RWDD3             | 1                         |
| S                 | 2                         |
| S100BP            | 1                         |
| SACM1L            | 1                         |
| SAFB              | 1                         |
| SARM1             | 1                         |
| SATB1             | 1                         |
| SATB2             | 1                         |
| SBDS              | 1                         |
| SBF1              | 1                         |
| SC4MOL            | 1                         |
| SC5DL             | 1                         |
| SCAMP1            | 1                         |
| SCARA3            | 1                         |
| SCARB1            | 1                         |
| SCLY              | 1                         |
| SCN1B             | 1                         |
| SCP2              | 1                         |

| UCSC_RefGene_Name | # of noteworthy CpG sites |
|-------------------|---------------------------|
| SCPEP1            | 1                         |
| SCRT1             | 1                         |
| SCRT2             | 1                         |
| SDC2              | 1                         |
| SDHD              | 1                         |
| SDK1              | 2                         |
| SDPR              | 1                         |
| SEC1              | 1                         |
| SEC24B            | 1                         |
| SEC61B            | 1                         |
| SEC62             | 1                         |
| SELI              | 1                         |
| SELO              | 1                         |
| SEMA3G            | 1                         |
| SEP15             | 1                         |
| SEPSECS           | 1                         |
| SEPT10            | 1                         |
| SEPT9             | 1                         |
| SERPINB8          | 1                         |
| SERPINE2          | 1                         |
| SESN1             | 1                         |
| SETD7             | 2                         |
| SEZ6              | 1                         |
| SF3A2             | 1                         |
| SF3A3             | 1                         |
| SFRS1             | 1                         |
| SFRS2B            | 1                         |
| SFRS2IP           | 1                         |
| SFRS6             | 1                         |
| SGK269            | 1                         |
| SGK3              | 1                         |
| SGSM2             | 1                         |
| SH2B1             | 2                         |
| SH3BGRL2          | 1                         |
| SH3BGRL3          | 1                         |
| SHANK1            | 1                         |
| SHARPIN           | 1                         |
| SHBG              | 1                         |
| SHE               | 1                         |
| SHF               | 2                         |
| SHISA6            | 1                         |
| SHKBP1            | 1                         |
| SIGIRR            | 1                         |
| SIGMAR1           | 1                         |
| SIK3              | 1                         |
| SIN3A             | 2                         |
| SIPA1L3           | 1                         |
| SIX2              | 2                         |
| SIX3              | 1                         |
| SIX5              | 1                         |
| SKA3              | 1                         |
| SKI               | 1                         |

| UCSC_RefGene_Name | # of noteworthy CpG sites |
|-------------------|---------------------------|
| SKP2              | 1                         |
| SLC10A7           | 1                         |
| SLC12A7           | 1                         |
| SLC15A4           | 1                         |
| SLC16             | 1                         |
| SLC16A1           | 1                         |
| SLC16A6           | 1                         |
| SLC16A9           | 1                         |
| SLC1A3            | 1                         |
| SLC2              | 1                         |
| SLC20A1           | 1                         |
| SLC22A17          | 2                         |
| SLC22A18          | 2                         |
| SLC22A18AS        | 2                         |
| SLC22A4           | 1                         |
| SLC22A5           | 1                         |
| SLC25A1           | 1                         |
| SLC25A13          | 1                         |
| SLC25A30          | 1                         |
| SLC25A33          | 1                         |
| SLC25A40          | 1                         |
| SLC26A10          | 1                         |
| SLC29A4           | 5                         |
| SLC35B1           | 1                         |
| SLC35C1           | 1                         |
| SLC35C2           | 1                         |
| SLC38A3           | 1                         |
| SLC39A1           | 1                         |
| SLC43A2           | 1                         |
| SLC5A10           | 1                         |
| SLC5A5            | 1                         |
| SLC6A             | 1                         |
| SLC6A11           | 1                         |
| SLC6A2            | 1                         |
| SLC6A3            | 1                         |
| SLC6A8            | 2                         |
| SLC7A11           | 1                         |
| SLC7A5P1          | 1                         |
| SLC7A5P2          | 1                         |
| SLITRK5           | 1                         |
| SMAGP             | 1                         |
| SMARCA4           | 1                         |
| SMARCD1           | 1                         |
| SMCR7             | 1                         |
| SMG5              | 1                         |
| SMPD1             | 1                         |
| SMPD3             | 1                         |
| SMPD4             | 1                         |
| SMPDL3A           | 1                         |
| SMYD3             | 2                         |
| SNAP29            | 2                         |
| SNAP47            | 1                         |

| UCSC_RefGene_Name | # of noteworthy CpG sites |
|-------------------|---------------------------|
| SNAP91            | 1                         |
| SNHG5             | 2                         |
| SNN               | 2                         |
| SNORA3            | 1                         |
| SNORA33           | 3                         |
| SNORA38B          | 1                         |
| SNORA76           | 1                         |
| SNORA84           | 1                         |
| SNORD1            | 2                         |
| SNORD100          | 1                         |
| SNORD115          | 2                         |
| SNORD115-15       | 1                         |
| SNORD1C           | 1                         |
| SNORD46           | 1                         |
| SNORD5            | 1                         |
| SNORD50B          | 2                         |
| SNORD57           | 1                         |
| SNORD58A          | 1                         |
| SNORD66           | 1                         |
| SNORD84           | 1                         |
| SNPH              | 1                         |
| SNRNP40           | 1                         |
| SNRNP70           | 1                         |
| SNRPA             | 1                         |
| SNTA1             | 1                         |
| SNTG2             | 1                         |
| SNX32             | 1                         |
| SOCS3             | 1                         |
| SOCS5             | 1                         |
| SORD              | 1                         |
| SORL1             | 1                         |
| SOST              | 1                         |
| SOX1              | 1                         |
| SOX12             | 1                         |
| SOX17             | 1                         |
| SOX21             | 1                         |
| SOX20T            | 1                         |
| SPAG6             | 1                         |
| SPATA13           | 1                         |
| SPATA17           | 1                         |
| SPEG              | 1                         |
| SPEN              | 2                         |
| SPG21             | 1                         |
| SPG7              | 1                         |
| SPG7              | 1                         |
| SPHK2             | 1                         |
| SPPL2A            | 1                         |
| SPPL3             | 1                         |
| SPRN              | 1                         |
| SPRY2             | 1                         |
| SPTBN1            | 1                         |
| SQLE              | 1                         |

| UCSC_RefGene_Name | # of noteworthy CpG sites |
|-------------------|---------------------------|
| SR140             | 1                         |
| SRC               | 1                         |
| SRCIN1            | 1                         |
| SREBF1            | 1                         |
| SRF               | 1                         |
| SRM               | 1                         |
| SRP9              | 1                         |
| SSBP1             | 1                         |
| SSC5D             | 1                         |
| SSH1              | 1                         |
| SSR4              | 1                         |
| SSRP1             | 1                         |
| SST               | 1                         |
| ST13              | 2                         |
| ST20              | 1                         |
| ST3GAL3           | 1                         |
| ST6GAL2           | 1                         |
| ST6GALNAC         | 1                         |
| ST7L              | 2                         |
| ST8SIA2           | 1                         |
| ST8SIA4           | 1                         |
| STAC2             | 1                         |
| STAC3             | 1                         |
| STARD10           | 1                         |
| STARD4            | 1                         |
| STAT5B            | 1                         |
| STK11             | 1                         |
| STK25             | 1                         |
| STOX1             | 1                         |
| STRADA            | 1                         |
| STRADB            | 1                         |
| STRAP             | 1                         |
| STRN3             | 1                         |
| STRN4             | 1                         |
| STX11             | 1                         |
| STX18             | 1                         |
| STYXL1            | 1                         |
| SUCLG1            | 1                         |
| SUGT1P1           | 1                         |
| SUPT16H           | 1                         |
| SYCN              | 1                         |
| SYNE1             | 1                         |
| SYNGAP1           | 2                         |
| SYNM              | 1                         |
| SYT9              | 1                         |
| SYTL3             | 1                         |
| TACC2             | 2                         |
| TADA3             | 1                         |
| TAF11             | 1                         |
| TAF1D             | 1                         |
| TALDO1            | 3                         |
| TANK              | 1                         |

| UCSC_RefGene_Name | # of noteworthy CpG sites |
|-------------------|---------------------------|
| TAPBP             | 2                         |
| TASP1             | 1                         |
| TBC1D13           | 1                         |
| TBC1D16           | 2                         |
| TBCA              | 1                         |
| TBCC              | 1                         |
| TBR1              | 1                         |
| TBRG1             | 1                         |
| TBX15             | 1                         |
| TBX2              | 1                         |
| TBX3              | 1                         |
| TCEA3             | 1                         |
| TCEB              | 1                         |
| TCEB3             | 1                         |
| TCEB3C            | 1                         |
| TCEB3CL           | 1                         |
| TCF21             | 1                         |
| TCF7L             | 1                         |
| TCF7L2            | 1                         |
| TCIRG1            | 1                         |
| TCP10L            | 1                         |
| TCP11             | 1                         |
| TCTA              | 1                         |
| TCTN2             | 1                         |
| TDP1              | 1                         |
| TDRD10            | 1                         |
| TDRD3             | 1                         |
| TEAD2             | 1                         |
| TELO2             | 1                         |
| TERF2             | 1                         |
| TERF2IP           | 1                         |
| TESK2             | 1                         |
| TET1              | 1                         |
| TEX264            | 1                         |
| TFAP2A            | 1                         |
| TFAP2B            | 1                         |
| TFB2M             | 1                         |
| TFDP3             | 2                         |
| TFG               | 1                         |
| TFRC              | 1                         |
| TGDS              | 1                         |
| TGFBR3            | 1                         |
| TGIF1             | 2                         |
| THAP1             | 1                         |
| THAP4             | 1                         |
| THAP5             | 2                         |
| THBS3             | 1                         |
| THOC1             | 2                         |
| THOC4             | 1                         |
| THUMPD1           | 1                         |
| THY1              | 1                         |
| TIA1              | 1                         |



| UCSC_RefGene_Name | # of noteworthy CpG sites |
|-------------------|---------------------------|
| TIGD6             | 1                         |
| TIMM44            | 1                         |
| TIMM8B            | 1                         |
| TIPIN             | 1                         |
| TIPRL             | 1                         |
| TJP1              | 1                         |
| TK1               | 1                         |
| TLX2              | 1                         |
| TM2D2             | 1                         |
| TM7SF4            | 1                         |
| TM9SF2            | 1                         |
| TMC2              | 1                         |
| TMED10            | 1                         |
| TMED2             | 4                         |
| TMEM              | 1                         |
| TMEM11            | 1                         |
| TMEM119           | 1                         |
| TMEM123           | 1                         |
| TMEM134           | 1                         |
| TMEM136           | 1                         |
| TMEM145           | 1                         |
| TMEM146           | 1                         |
| TMEM147           | 1                         |
| TMEM150A          | 1                         |
| TMEM17            | 1                         |
| TMEM171           | 1                         |
| TMEM175           | 1                         |
| TMEM183A          | 1                         |
| TMEM183B          | 1                         |
| TMEM186           | 1                         |
| TMEM188           | 1                         |
| TMEM189           | 1                         |
| TMEM192           | 1                         |
| TMEM199           | 1                         |
| TMEM206           | 1                         |
| TMEM214           | 2                         |
| TMEM217           | 1                         |
| TMEM22            | 1                         |
| TMEM43            | 1                         |
| TMEM53            | 2                         |
| TMEM59L           | 1                         |
| TMEM60            | 1                         |
| TMEM63B           | 1                         |
| TMEM79            | 1                         |
| TMEM8B            | 1                         |
| TMEM9             | 1                         |
| TMEM90A           | 1                         |
| TMOD2             | 2                         |
| TMSL3             | 1                         |
| TNFAIP3           | 1                         |
| TNFRSF10B         | 2                         |
| TNFRSF10C         | 1                         |

| UCSC_RefGene_Name | # of noteworthy CpG sites |
|-------------------|---------------------------|
| TNFRSF12A         | 2                         |
| TNFRSF19          | 2                         |
| TNIP2             | 3                         |
| TNNT3             | 1                         |
| TNRC6A            | 1                         |
| TNRC6B            | 1                         |
| TNS1              | 1                         |
| TNXB              | 1                         |
| TOE1              | 1                         |
| TOM1L1            | 1                         |
| TOMM40            | 1                         |
| TOR1AIP1          | 1                         |
| TOR3A             | 1                         |
| TOX               | 3                         |
| TP73              | 2                         |
| TPBG              | 1                         |
| TPCN1             | 1                         |
| TPM4              | 2                         |
| TPMT              | 1                         |
| TPTE2             | 1                         |
| TRABD             | 1                         |
| TRAF4             | 1                         |
| TRAK2             | 1                         |
| TRAPPC10          | 1                         |
| TRAPPC2           | 1                         |
| TRAPPC4           | 1                         |
| TRAPPC6B          | 1                         |
| TRERF1            | 1                         |
| TRIM11            | 1                         |
| TRIM15            | 1                         |
| TRIM16            | 1                         |
| TRIM26            | 1                         |
| TRIM27            | 1                         |
| TRIM28            | 2                         |
| TRIM31            | 1                         |
| TRIM33            | 1                         |
| TRIM39            | 1                         |
| TRIM52            | 2                         |
| TRIM54            | 1                         |
| TRIM58            | 1                         |
| TRIM59            | 1                         |
| TRIM71            | 1                         |
| TRIO              | 1                         |
| TRMT1             | 1                         |
| TRMT2A            | 1                         |
| TRNAU1AP          | 1                         |
| TRNT1             | 1                         |
| TSC22D1           | 1                         |
| TSEN15            | 1                         |
| TSEN2             | 1                         |
| TSGA10            | 2                         |
| TSNARE1           | 1                         |

| UCSC_RefGene_Name | # of noteworthy CpG sites |
|-------------------|---------------------------|
| TSPAN             | 1                         |
| TSPAN4            | 1                         |
| TSP02             | 1                         |
| TSPYL3            | 1                         |
| TSR1              | 1                         |
| TSSC1             | 1                         |
| TSSC4             | 2                         |
| TSTA3             | 1                         |
| TTC1              | 1                         |
| TTC14             | 1                         |
| TTC25             | 1                         |
| TTC29             | 1                         |
| TTLL1             | 1                         |
| TTLL4             | 1                         |
| TTYH2             | 1                         |
| TUBA1A            | 1                         |
| TUBA1B            | 1                         |
| TUBB4             | 1                         |
| TUBG1             | 1                         |
| TUBGCP3           | 1                         |
| TUSC4             | 2                         |
| TXNDC15           | 1                         |
| TXNDC16           | 2                         |
| TXNDC5            | 1                         |
| TXNL4B            | 1                         |
| TXNRD             | 1                         |
| TXNRD1            | 1                         |
| TYMP              | 3                         |
| UBAP1             | 1                         |
| UBASH3B           | 2                         |
| UBB               | 2                         |
| UBC               | 2                         |
| UBE2A             | 2                         |
| UBE2D1            | 1                         |
| UBE2E3            | 2                         |
| UBE2F             | 1                         |
| UBE2J1            | 1                         |
| UBE2K             | 1                         |
| UBE2L3            | 1                         |
| UBE2M             | 1                         |
| UBE2V1            | 1                         |
| UBE2V2            | 1                         |
| UBOX5             | 1                         |
| UBTF              | 1                         |
| UCRC              | 1                         |
| UGCG              | 1                         |
| ULK1              | 1                         |
| ULK1              | 1                         |
| UNC13B            | 1                         |
| UNC45A            | 1                         |
| UQCRFS1           | 1                         |
| USP14             | 2                         |

| UCSC_RefGene_Name | # of noteworthy CpG sites |
|-------------------|---------------------------|
| USP18             | 1                         |
| USP24             | 1                         |
| USP3              | 1                         |
| USP35             | 1                         |
| USP36             | 1                         |
| USP47             | 2                         |
| USP6NL            | 1                         |
| UST               | 1                         |
| UVRAG             | 1                         |
| VAPA              | 1                         |
| VARS              | 1                         |
| VDAC2             | 1                         |
| VDAC3             | 1                         |
| VDR               | 1                         |
| VENTX             | 1                         |
| VIM               | 1                         |
| VKORC             | 1                         |
| VKORC1            | 1                         |
| VKORC1            | 1                         |
| VPS13B            | 1                         |
| VPS13C            | 1                         |
| VPS16             | 1                         |
| VPS37A            | 1                         |
| VPS52             | 1                         |
| VPS53             | 2                         |
| VRK1              | 1                         |
| VSTM2A            | 1                         |
| VTI1B             | 1                         |
| VWA2              | 1                         |
| WARS2             | 1                         |
| WASL              | 2                         |
| WBSCR26           | 1                         |
| WDR12             | 1                         |
| WDR26             | 1                         |
| WDR37             | 1                         |
| WDR45L            | 1                         |
| WDR51B            | 1                         |
| WDR59             | 1                         |
| WDR70             | 1                         |
| WDR76             | 1                         |
| WDR8              | 2                         |
| WDR82             | 1                         |
| WDR87             | 1                         |
| WDR91             | 1                         |
| WDR92             | 1                         |
| WDSUB1            | 1                         |
| WHSC1L1           | 1                         |
| WIPI2             | 1                         |
| WIPI2             | 1                         |
| WNT10A            | 1                         |
| WNT16             | 1                         |
| WNT3A             | 4                         |

| UCSC_RefGene_Name | # of noteworthy CpG sites |
|-------------------|---------------------------|
| WNT8B             | 1                         |
| WRN               | 1                         |
| XKR6              | 1                         |
| XKR7              | 1                         |
| XPC               | 1                         |
| XPNPEP3           | 2                         |
| XRCC5             | 1                         |
| XRCC6BP1          | 1                         |
| YARS              | 1                         |
| YIPF3             | 1                         |
| YTHDF2            | 2                         |
| YWHAB             | 1                         |
| YWHAH             | 1                         |
| YWHAZ             | 1                         |
| YY1               | 1                         |
| YY1AP1            | 1                         |
| ZBTB12            | 1                         |
| ZBTB16            | 1                         |
| ZBTB20            | 1                         |
| ZBTB44            | 1                         |
| ZBTB80S           | 2                         |
| ZBTB9             | 1                         |
| ZC3H14            | 1                         |
| ZC3H15            | 1                         |
| ZC3H18            | 1                         |
| ZC3H3             | 1                         |
| ZC3H6             | 1                         |
| ZC3HAV1L          | 1                         |
| ZCCHC14           | 1                         |
| ZCCHC17           | 1                         |
| ZCCHC24           | 1                         |
| ZCCHC9            | 1                         |
| ZDHHC13           | 1                         |
| ZDHHC19           | 1                         |
| ZDHHC2            | 1                         |
| ZDHHC23           | 2                         |
| ZDHHC8P           | 1                         |
| ZEB1              | 2                         |
| ZEB2              | 1                         |
| ZFAND             | 1                         |
| ZFAND1            | 2                         |
| ZFP36L2           | 1                         |
| ZFP62             | 1                         |
| ZFP64             | 1                         |
| ZFYVE26           | 1                         |
| ZIC1              | 1                         |
| ZIK1              | 1                         |
| ZMAT5             | 1                         |
| ZMIZ1             | 1                         |
| ZNF114            | 1                         |
| ZNF132            | 1                         |
| ZNF136            | 1                         |

| UCSC_RefGene_Name | # of noteworthy CpG sites |
|-------------------|---------------------------|
| ZNF14             | 1                         |
| ZNF141            | 1                         |
| ZNF142            | 1                         |
| ZNF148            | 1                         |
| ZNF184            | 1                         |
| ZNF195            | 1                         |
| ZNF215            | 1                         |
| ZNF219            | 1                         |
| ZNF229            | 1                         |
| ZNF248            | 2                         |
| ZNF257            | 1                         |
| ZNF259            | 1                         |
| ZNF276            | 1                         |
| ZNF286B           | 1                         |
| ZNF30             | 1                         |
| ZNF319            | 1                         |
| ZNF320            | 1                         |
| ZNF33B            | 1                         |
| ZNF341            | 1                         |
| ZNF343            | 1                         |
| ZNF35             | 1                         |
| ZNF354C           | 1                         |
| ZNF362            | 1                         |
| ZNF37B            | 1                         |
| ZNF391            | 1                         |
| ZNF395            | 1                         |
| ZNF420            | 1                         |
| ZNF426            | 1                         |
| ZNF432            | 1                         |
| ZNF440            | 1                         |
| ZNF441            | 1                         |
| ZNF444            | 1                         |
| ZNF460            | 1                         |
| ZNF470            | 1                         |
| ZNF480            | 1                         |
| ZNF487            | 1                         |
| ZNF488            | 1                         |
| ZNF509            | 1                         |
| ZNF513            | 1                         |
| ZNF525            | 1                         |
| ZNF543            | 1                         |
| ZNF546            | 1                         |
| ZNF554            | 2                         |
| ZNF566            | 1                         |
| ZNF57             | 1                         |
| ZNF579            | 1                         |
| ZNF595            | 1                         |
| ZNF616            | 1                         |
| ZNF621            | 1                         |
| ZNF626            | 1                         |
| ZNF665            | 1                         |
| ZNF69             | 1                         |

| UCSC_RefGene_Name | # of noteworthy CpG sites |
|-------------------|---------------------------|
| ZNF696            | 1                         |
| ZNF70             | 1                         |
| ZNF71             | 1                         |
| ZNF717            | 1                         |
| ZNF718            | 2                         |
| ZNF75A            | 1                         |
| ZNF770            | 1                         |
| ZNF773            | 1                         |
| ZNF780A           | 1                         |
| ZNF789            | 1                         |
| ZNF8              | 1                         |
| ZNF805            | 1                         |
| ZNF815            | 1                         |
| ZNF816A           | 1                         |
| ZNF821            | 1                         |
| ZNF830            | 1                         |
| ZNF831            | 1                         |
| ZNF844            | 1                         |
| ZNF845            | 1                         |
| ZNF846            | 1                         |
| ZNF93             | 1                         |
| ZNHIT1            | 2                         |
| ZNRD1             | 1                         |
| ZNRF1             | 1                         |
| ZSWIM4            | 1                         |
| ZYG11B            | 1                         |

## Appendix D

### Reliability of saliva-derived DNA methylation values/correlation with lymphocyte methylation values

To the best of our knowledge, no data have been published on the test–retest reliability/reproducibility of saliva-derived DNA methylation values, or the correlation of saliva-derived and lymphocyte-derived DNA methylation values across a wide range of CpG sites. For this reason, prior to initiating the whole epigenome analyses for the present study, a small pilot project was conducted to examine the reliability of methylation values derived from saliva-derived DNA specimens and to determine the correlation between methylation values derived from saliva and lymphocyte specimens across a number of CpG sites. The Illumina GoldenGate methylation array-based approach was used for the pilot. This is a customized array, including methylation probes for 384 CpGs in the promoter region of 82 candidate genes. These 82 candidate genes are involved in several brain neurotransmission systems (dopaminergic, opioidergic, serotonergic, GABAergic/glutamatergic, cholinergic, and cannabinoidergic); alcohol metabolism; DNA methylation; or signal transduction for alcohol reward and reinforcement. Specimens were collected from two adult subjects on a given day. As is evident from Figure 1D, the methylation levels generated using salivary DNA showed: excellent test–retest reliability ( $r = 0.99$ ) and high correlation with methylation levels obtained from blood DNA ( $r = 0.97$ ).

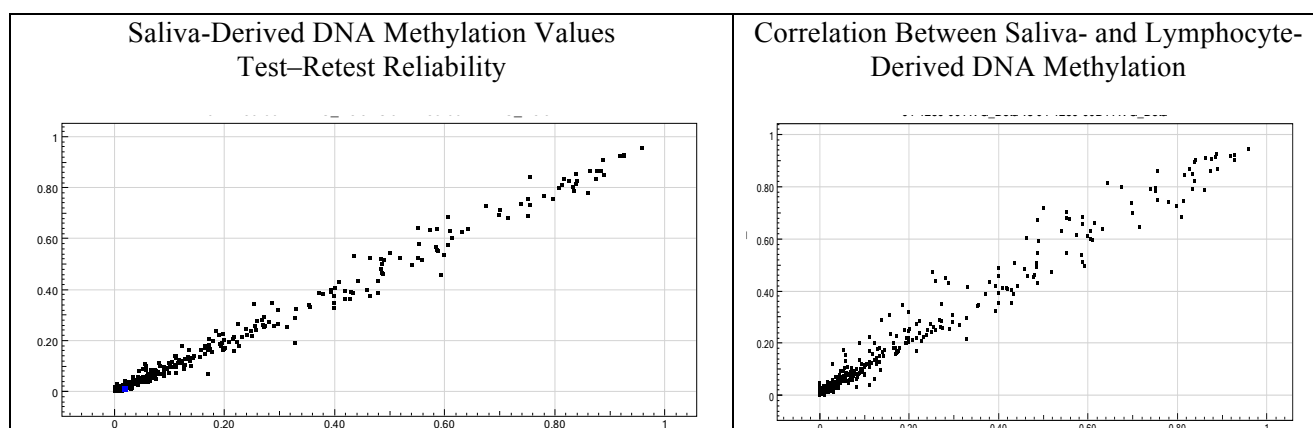

Figure 1D. Methylation values from saliva-derived DNA specimens reliable and highly correlated with methylation values from lymphocytes

Note: Methylation beta values at 384 CpG sites in 82 genes demonstrate that methylation levels generated using saliva-derived DNA show: (left panel) excellent test–retest reliability ( $r = 0.99$ ); and (right panel) high correlation with methylation levels obtained from blood DNA specimens ( $r = 0.97$ ).



## Appendix E

### Biological process networks associated with genes differentially methylated in maltreated and control children

| #  | Networks                                                                      | p-value   | Ratio |     |
|----|-------------------------------------------------------------------------------|-----------|-------|-----|
| 1  | Cell adhesion_Cadherins                                                       | 1.403E-07 | 49    | 180 |
| 2  | Cytoskeleton_Regulation of cytoskeleton rearrangement                         | 2.441E-07 | 49    | 183 |
| 3  | Signal transduction_WNT signaling                                             | 8.513E-06 | 44    | 177 |
| 4  | Cell adhesion_Cell junctions                                                  | 1.080E-05 | 41    | 162 |
| 5  | Reproduction_Progesterone signaling                                           | 2.248E-05 | 49    | 212 |
| 6  | Inflammation_IL-2 signaling                                                   | 3.100E-05 | 29    | 104 |
| 7  | Development_Neurogenesis_Axonal guidance                                      | 5.019E-05 | 51    | 230 |
| 8  | Signal transduction_NOTCH signaling                                           | 5.072E-05 | 52    | 236 |
| 9  | Signal Transduction_Cholecystokinin signaling                                 | 1.202E-04 | 28    | 106 |
| 10 | Cell adhesion_Amyloid proteins                                                | 2.197E-04 | 43    | 195 |
| 11 | Cytoskeleton_Cytoplasmic microtubules                                         | 2.208E-04 | 29    | 115 |
| 12 | Translation_Regulation of initiation                                          | 2.556E-04 | 31    | 127 |
| 13 | Cell cycle_Mitosis                                                            | 2.695E-04 | 40    | 179 |
| 14 | Cytoskeleton_Intermediate filaments                                           | 4.120E-04 | 22    | 81  |
| 15 | Cell adhesion_Synaptic contact                                                | 4.903E-04 | 40    | 184 |
| 16 | Apoptosis_Anti-Apoptosis mediated by external signals via MAPK and JAK/STAT   | 5.480E-04 | 39    | 179 |
| 17 | Development_Regulation of telomere length                                     | 7.103E-04 | 16    | 53  |
| 18 | Cell cycle_G1-S Growth factor regulation                                      | 8.540E-04 | 41    | 195 |
| 19 | Signal Transduction_TGF-beta, GDF and Activin signaling                       | 1.516E-03 | 33    | 152 |
| 20 | Translation_Translation initiation                                            | 1.686E-03 | 36    | 171 |
| 21 | Cardiac development_Wnt_beta-catenin, Notch, VEGF, IP3 and integrin signaling | 2.388E-03 | 32    | 150 |
| 22 | Cell adhesion_Attractive and repulsive receptors                              | 2.563E-03 | 36    | 175 |
| 23 | Development_Ossification and bone remodeling                                  | 2.651E-03 | 33    | 157 |
| 24 | Cell cycle_G1-S Interleukin regulation                                        | 2.979E-03 | 28    | 128 |
| 25 | Reproduction_FSH-beta signaling pathway                                       | 3.276E-03 | 33    | 159 |
| 26 | Development_Blood vessel morphogenesis                                        | 3.371E-03 | 44    | 228 |
| 27 | Signal transduction_Leptin signaling                                          | 3.605E-03 | 24    | 106 |
| 28 | Transcription_mRNA processing                                                 | 3.634E-03 | 33    | 160 |
| 29 | Development_Hemopoiesis, Erythropoietin pathway                               | 3.760E-03 | 29    | 136 |
| 30 | Inflammation_IL-6 signaling                                                   | 4.196E-03 | 26    | 119 |
| 31 | Signal transduction_ESR1-membrane pathway                                     | 4.316E-03 | 21    | 90  |
| 32 | Cytoskeleton_Actin filaments                                                  | 5.175E-03 | 35    | 176 |
| 33 | Cytoskeleton_Spindle microtubules                                             | 5.249E-03 | 24    | 109 |
| 34 | Cell adhesion_Integrin priming                                                | 5.920E-03 | 24    | 110 |
| 35 | Reproduction_Feeding and Neurohormone signaling                               | 6.356E-03 | 40    | 210 |
| 36 | Development_Neurogenesis in general                                           | 7.004E-03 | 37    | 192 |
| 37 | Cell cycle_G2-M                                                               | 7.141E-03 | 39    | 205 |
| 38 | Development_EMT_Regulation of epithelial-to-mesenchymal transition            | 7.845E-03 | 43    | 232 |
| 39 | Inflammation_MIF signaling                                                    | 1.076E-02 | 28    | 140 |
| 40 | Immune response_Phagosome in antigen presentation                             | 1.171E-02 | 44    | 244 |
| 41 | Signal transduction_CREM pathway                                              | 1.187E-02 | 21    | 98  |
| 42 | Reproduction_Gonadotropin regulation                                          | 1.242E-02 | 37    | 199 |
| 43 | Development_Neurogenesis_Synaptogenesis                                       | 1.280E-02 | 34    | 180 |
| 44 | Cell adhesion_Integrin-mediated cell-matrix adhesion                          | 1.440E-02 | 39    | 214 |
| 45 | Reproduction_GnRH signaling pathway                                           | 1.971E-02 | 31    | 166 |

|    |                                                                        |           |    |     |
|----|------------------------------------------------------------------------|-----------|----|-----|
| 46 | Muscle contraction_Nitric oxide signaling in the cardiovascular system | 2.155E-02 | 23 | 116 |
| 47 | Immune response_BCR pathway                                            | 2.568E-02 | 26 | 137 |
| 48 | Inflammation_Amphoterin signaling                                      | 2.597E-02 | 23 | 118 |
| 49 | Development_Regulation of angiogenesis                                 | 2.676E-02 | 39 | 223 |
| 50 | Signal transduction_ERBB-family signaling                              | 2.703E-02 | 16 | 75  |
